# Supplementary material for: Identifying Candidate Protein Markers of Acute Kidney Injury in Acute Decompensated Heart Failure
Source: Int J Mol Sci. 2022 Jan 17;23(2):1009. doi: 10.3390/ijms23021009 (PMC8778509; doi:10.3390/ijms23021009)
Supplement: Supplementary file 1 [file ijms-23-01009-s001.zip › Supplementary Data Protein masterfile Templeton et al.xlsx]

## Sheet: Protein masterfile
Protein Name	Uniprot ID	Gene	Median protein intensity at baseline	B-HF Absolute Fold Change	BL-HF FC Direction	BL-HF P-value	BL-HF BH Adjusted P-value	HF-R Absolute Fold Change	HF-R FC Direction	HF-R P-value	HF-R BH Adjusted P-value	B-R Absolute Fold Change	BL-R FC Direction	BL-R P-value	BL-R BH Adjusted P-value	Baseline Group Mean	HF Group Mean	Recovery Group Mean	BL-HF FC	BL-HF FC Log2	HF-R FC	HF-R FC Log2	BL-R FC	BL-R FC Log2	Species	Species Number	Statistical Test	Kidney enriched protein (Human Protein Atlas)	Secreted protein (Human Protein Atlas Secretome)	Blood	Plasma/Serum	Urine	IPA Biomarker	Potential Biomarker
20beta-hydroxysteroid dehydrogenase type 2	A0A088Q711	hsd20b2	2.03842e+06	1.45342	Down	0.038851	0.151194	1.33857	Up	0.080169	0.537161	1.0858	Down	0.500994	0.762592	1.88344e+06	1.29587e+06	1.73461e+06	0.688034	-0.539448	1.33857	0.420687	0.920978	-0.118761	Ovis aries	9940	Welch one-way test	N	N	N	N	N	N	N
Progesterone receptor membrane component 1	A0A097GTW7	PGRMC1	1.77672e+06	1.02369	Up	0.769991	0.858644	1.06263	Up	0.311889	0.729668	1.08781	Up	0.324826	0.633611	1.69602e+06	1.7362e+06	1.84495e+06	1.02369	0.0337835	1.06263	0.0876418	1.08781	0.121425	Ovis aries	9940	Welch one-way test	N	N	N	N	N	N	N
NAD(P) transhydrogenase, mitochondrial	A0A571N6A6	NNT	3.33895e+06	1.04156	Down	0.516966	0.692209	1.09793	Up	0.248933	0.700719	1.05412	Up	0.584259	0.806931	3.42791e+06	3291122	3.61342e+06	0.960096	-0.0587491	1.09793	0.134785	1.05412	0.0760356	Ovis aries	9940	Welch one-way test	N	N	Y	Y	N	Y	Y
Glyoxalase domain-containing protein 4	A0A5C2D147	GLOD4	720055	1.1285	Down	0.176967	0.376138	1.13024	Up	0.115755	0.575135	1.00154	Up	0.986074	0.992355	691568	612822	692637	0.886134	-0.174403	1.13024	0.17663	1.00154	0.00222688	Ovis aries	9940	Welch one-way test	N	N	N	N	Y	Y	Y
Beta-2-microglobulin	A4ZVY8	NA	813502	1.07784	Up	0.437648	0.632069	1.28336	Up	0.0009	0.1185	1.38326	Up	0.005554	0.131074	740207	797826	1.0239e+06	1.07784	0.108145	1.28336	0.35993	1.38326	0.468075	Ovis aries	9940	Welch one-way test	N	N	N	N	N	N	N
Vimentin (Fragment)	A4ZYA6	NA	7.33798e+06	1.47008	Up	0.004716	0.0582131	1.04636	Down	0.67148	0.890049	1.40495	Up	0.02304	0.244671	7.43387e+06	10928393	1.04442e+07	1.47008	0.555896	0.955696	-0.0653769	1.40495	0.490519	Ovis aries	9940	Welch one-way test	N	N	N	N	N	N	N
Heat shock protein alpha	A8DR93	HSPCA	1.49533e+06	1.28452	Up	0.017633	0.102427	1.09909	Down	0.27621	0.711462	1.16871	Up	0.106888	0.405179	1.56655e+06	2.01226e+06	1.83084e+06	1.28452	0.361224	0.909843	-0.13631	1.16871	0.224914	Ovis aries	9940	Welch one-way test	N	N	N	N	Y	Y	Y
Calpain II 80 kDa subunit	A8IF71	NA	233953	1.04296	Down	0.62834	0.769595	1.07621	Down	0.27738	0.711462	1.12245	Down	0.211759	0.5423	241091	231159	214790	0.958806	-0.0606898	0.929187	-0.105959	0.89091	-0.166649	Ovis aries	9940	Welch one-way test	N	N	N	N	N	N	N
Pre-mRNA splicing factor SRP20-like protein	B0FZL9	SRSF3	396955	1.13562	Up	0.138181	0.319176	1.04154	Up	0.652049	0.877545	1.1828	Up	0.197313	0.535236	417481	474101	493795	1.13562	0.183484	1.04154	0.0587175	1.1828	0.242202	Ovis aries	9940	Welch one-way test	N	N	N	N	N	N	N
Myosin light chain 6 (Fragment)	B0FZM4	NA	3.87986e+06	1.14489	Up	0.023488	0.115252	1.11256	Down	0.226308	0.692959	1.02906	Up	0.795955	0.912731	3.94074e+06	4.51171e+06	4055253	1.14489	0.195206	0.898829	-0.153881	1.02906	0.0413247	Ovis aries	9940	Welch one-way test	N	N	N	N	N	N	N
Glutathione S-transferase A1	B0LXN9	GSTA1	1.70335e+06	1.43209	Down	0.006457	0.073928	1.07324	Down	0.546023	0.8504	1.53698	Down	0.002787	0.0897756	1.59224e+06	1.11183e+06	1035953	0.698279	-0.518124	0.931758	-0.101972	0.650628	-0.620096	Ovis aries	9940	Welch one-way test	Y	N	N	N	N	N	N
Lipase	B2LSM5	NA	53342.5	1.29389	Up	0.138039	0.319176	1.35353	Down	0.029084	0.389784	1.04609	Down	0.827872	0.922453	58709.2	75963.5	56122.7	1.29389	0.37172	0.738811	-0.436722	0.955944	-0.0650022	Ovis aries	9940	Welch one-way test	N	N	N	N	N	N	N
RAS oncogene family-like 7A	B2LYK6	RAB7A	383840	1.0299	Up	0.343145	0.545499	1.01213	Down	0.695505	0.899183	1.01755	Up	0.579832	0.804809	392056	403778	398937	1.0299	0.0425015	0.988011	-0.0174014	1.01755	0.0251001	Ovis aries	9940	Welch one-way test	N	N	Y	N	Y	Y	Y
SLC25A5	B2MVW9	NA	922126	1.02323	Down	0.740366	0.840358	1.01046	Down	0.874157	0.967128	1.03393	Down	0.664296	0.853323	937854	916560	907075	0.977295	-0.0331342	0.989651	-0.0150076	0.967181	-0.0481418	Ovis aries	9940	Welch one-way test	N	N	N	N	N	N	N
SLC25A6	B2MVX0	NA	430709	1.04249	Down	0.565974	0.723459	1.13239	Up	0.05643	0.490123	1.08624	Up	0.399939	0.693696	468174	449094	508552	0.959245	-0.060028	1.13239	0.179377	1.08624	0.119349	Ovis aries	9940	Welch one-way test	N	N	N	N	N	N	N
Hydroxyacyl-coenzyme A dehydrogenase/3-ketoacyl-coenzyme A thiolase/enoyl-coenzyme A hydratase (Trifunctional protein) alpha subunit	B6UV59	HADHA	2.12751e+06	1.10809	Up	0.18288	0.386297	1.01659	Up	0.839551	0.952939	1.12647	Up	0.275647	0.598245	2.25888e+06	2.50304e+06	2544572	1.10809	0.148072	1.01659	0.0237402	1.12647	0.171812	Ovis aries	9940	Welch one-way test	N	N	Y	Y	N	Y	Y
Phosphoglycerate kinase	B7TJ13	PGK1	3.00523e+06	1.03616	Down	0.591188	0.743692	1.08803	Up	0.140764	0.601047	1.05007	Up	0.224292	0.552762	3.08111e+06	2.97359e+06	3.23537e+06	0.965105	-0.0512429	1.08803	0.121722	1.05007	0.0704787	Ovis aries	9940	Welch one-way test	N	N	Y	Y	Y	Y	Y
SLC25A3	B7U168	SLC25A3	2631697	1.10401	Down	0.406208	0.607773	1.02814	Down	0.632587	0.870393	1.13507	Down	0.305556	0.624206	3101749	2.80953e+06	2.73264e+06	0.90579	-0.142752	0.972632	-0.0400348	0.881	-0.182786	Ovis aries	9940	Welch one-way test	N	N	N	N	N	N	N
Superoxide dismutase [Cu-Zn]	B9VGZ6	SOD1	2.15571e+06	1.1136	Down	0.298354	0.507557	1.04397	Up	0.641165	0.872258	1.0667	Down	0.540319	0.783327	2.0023e+06	1.79804e+06	1877098	0.897989	-0.15523	1.04397	0.0620792	0.937473	-0.0931511	Ovis aries	9940	Welch one-way test	N	N	Y	Y	Y	Y	Y
Cytochrome b-c1 complex subunit 6	B9VH04	UQCRH	325923	1.41889	Down	0.014015	0.0907754	1.06865	Up	0.436055	0.822156	1.32774	Down	0.052373	0.312068	363742	256356	273955	0.704774	-0.504767	1.06865	0.0957886	0.753157	-0.408978	Ovis aries	9940	Welch one-way test	N	N	N	N	N	N	N
Rab GDP dissociation inhibitor	C5IJ88	NA	1.3364e+06	1.07736	Up	0.072673	0.207262	1.02529	Down	0.457351	0.843412	1.05078	Up	0.085045	0.383351	1.33004e+06	1.43293e+06	1.39758e+06	1.07736	0.107497	0.975329	-0.0360388	1.05078	0.0714581	Ovis aries	9940	Welch one-way test	N	N	N	N	N	N	N
RHOA	C5IJ99	RHOA	967141	1.07223	Down	0.424907	0.625284	1.08948	Down	0.107966	0.568621	1.16817	Down	0.124821	0.429263	980033	914010	838944	0.932632	-0.10062	0.917872	-0.123635	0.856037	-0.224255	Ovis aries	9940	Welch one-way test	N	N	Y	N	Y	Y	Y
GTP-binding nuclear protein Ran	C5IJA0	RAN	533847	1.21991	Up	0.017143	0.101067	1.08518	Down	0.171036	0.631764	1.12415	Up	0.117036	0.420316	515952	629415	580010	1.21991	0.286774	0.921506	-0.117934	1.12415	0.16884	Ovis aries	9940	Welch one-way test	N	N	Y	N	N	Y	Y
Adenylate kinase isoenzyme 1	C5IJA8	AK1	388325	1.05021	Down	0.604228	0.751192	1.08191	Up	0.469156	0.843412	1.03018	Up	0.769199	0.903242	392008	373266	403839	0.952188	-0.0706813	1.08191	0.113579	1.03018	0.0428975	Ovis aries	9940	Welch one-way test	N	N	N	N	N	N	N
Tubulin alpha chain	C5ISA2	TUBA4A	4.34499e+06	1.02897	Down	0.748247	0.843906	1.00441	Down	0.944761	0.979477	1.03351	Down	0.660631	0.851384	3966221	3.85454e+06	3.83763e+06	0.971843	-0.0412049	0.995612	-0.00634382	0.967579	-0.0475487	Ovis aries	9940	Welch one-way test	N	N	Y	N	Y	Y	Y
Chromosome 21 open reading frame 33	C5IWT4	C21orf33	1.30309e+06	1.0337	Down	0.519888	0.693769	1.13625	Up	0.064317	0.50642	1.0992	Up	0.229454	0.554338	1.32305e+06	1.27991e+06	1.4543e+06	0.967398	-0.0478183	1.13625	0.184275	1.0992	0.136457	Ovis aries	9940	Welch one-way test	N	N	N	N	N	N	N
Thioredoxin domain containing 17	C5IWT7	TXNDC17	2.0187e+06	1.22061	Up	0.002643	0.0453907	1.05854	Up	0.379134	0.773822	1.29206	Up	0.006933	0.144133	2.04653e+06	2.49801e+06	2.64425e+06	1.22061	0.2876	1.05854	0.082078	1.29206	0.369678	Ovis aries	9940	Welch one-way test	N	N	N	N	Y	Y	Y
ADP-ribosylation factor 1	C5IWU0	ARF1	150908	1.05541	Up	0.538178	0.703545	1.10493	Down	0.189694	0.669196	1.04692	Down	0.589767	0.808882	154017	162551	147115	1.05541	0.0778036	0.905036	-0.143954	0.955184	-0.06615	Ovis aries	9940	Welch one-way test	N	N	N	N	N	N	N
ADP-ribosylation factor-like 3	C5IWU4	ARL3	262750	1.03162	Down	0.630479	0.771019	1.08002	Up	0.10923	0.570271	1.04692	Up	0.463807	0.732796	262542	254494	274860	0.969346	-0.0449165	1.08002	0.111064	1.04692	0.066147	Ovis aries	9940	Welch one-way test	N	N	N	N	N	N	N
Fumarate hydratase	C5IWV1	FH	2.25265e+06	1.03055	Up	0.459355	0.647997	1.08224	Up	0.214214	0.68715	1.1153	Up	0.157902	0.479779	2.2655e+06	2.33471e+06	2.52672e+06	1.03055	0.0434131	1.08224	0.11402	1.1153	0.157433	Ovis aries	9940	Welch one-way test	N	N	N	N	N	N	N
Protein disulfide-isomerase	C6JUQ0	PDIA3	1.73389e+06	1.15379	Up	0.023968	0.115456	1.03776	Down	0.529192	0.849376	1.11181	Up	0.127764	0.432295	1.7382e+06	2.00551e+06	1932537	1.15379	0.206381	0.963612	-0.0534759	1.11181	0.152905	Ovis aries	9940	Welch one-way test	N	N	Y	N	Y	Y	Y
Peroxiredoxin	C8BKC5	PRDX2	1.93616e+06	1.03504	Up	0.567778	0.723459	1.02454	Down	0.699058	0.899183	1.01025	Up	0.885458	0.951717	1.86893e+06	1.93442e+06	1.88809e+06	1.03504	0.0496864	0.976051	-0.034972	1.01025	0.0147145	Ovis aries	9940	Welch one-way test	N	N	Y	Y	Y	Y	Y
Cathepsin D (Fragment)	C9DFF9	CTSD	2.32662e+06	1.30967	Up	0.059159	0.188649	1.18209	Up	0.231831	0.694461	1.54815	Up	0.036852	0.269566	2.33752e+06	3.06138e+06	3.61883e+06	1.30967	0.389205	1.18209	0.241338	1.54815	0.630543	Ovis aries	9940	Welch one-way test	N	Y	Y	Y	Y	Y	Y
Cytochrome b5	C9E8M7	CYB5	5.92982e+06	1.03744	Down	0.734139	0.836897	1.03382	Up	0.665418	0.889476	1.00351	Down	0.972843	0.988563	5457588	5.26062e+06	5438524	0.963909	-0.0530309	1.03382	0.0479826	0.996507	-0.00504833	Ovis aries	9940	Welch one-way test	N	N	N	N	N	N	N
Ribosomal protein L23a	D4P8H6	rpl23a	134474	1.2573	Up	0.008497	0.0764594	1.04624	Down	0.541507	0.8504	1.20173	Up	0.031608	0.253241	137219	172525	164900	1.2573	0.330327	0.955802	-0.0652158	1.20173	0.265112	Ovis aries	9940	Welch one-way test	N	N	N	N	N	N	N
40S ribosomal protein SA	D5HKJ4	RPSA	947103	1.18672	Up	0.023011	0.114535	1.07562	Down	0.210389	0.681177	1.10329	Up	0.106025	0.404636	929070	1.10255e+06	1.02503e+06	1.18672	0.246979	0.929694	-0.105173	1.10329	0.141806	Ovis aries	9940	Welch one-way test	N	N	Y	N	N	Y	Y
Glyceraldehyde-3-phosphate dehydrogenase	D7R7V6	GAPDH	2.50197e+07	1.09	Down	0.065528	0.196833	1.02571	Up	0.549646	0.8504	1.06268	Down	0.230996	0.554671	2.55104e+07	23403940	2.40057e+07	0.917427	-0.124335	1.02571	0.0366267	0.941017	-0.0877078	Ovis aries	9940	Welch one-way test	N	N	Y	Y	Y	Y	Y
Beta-actin variant 2	D7RIF5	ACTB	5.2705e+06	1.02825	Down	0.795762	0.873128	1.01076	Up	0.903482	0.967839	1.0173	Down	0.841104	0.928185	5.37234e+06	5.22475e+06	5.28098e+06	0.972528	-0.0401881	1.01076	0.0154435	0.982995	-0.0247446	Ovis aries	9940	Welch one-way test	N	N	N	N	N	N	N
Serpin peptidase inhibitor clade B ovalbumin member 1	D8X187	SERPINB1	103720	1.79593	Up	0.041923	0.159227	1.01087	Up	0.962889	0.981119	1.81545	Up	0.09569	0.388344	138215	248224	250922	1.79593	0.844729	1.01087	0.0155952	1.81545	0.860324	Ovis aries	9940	Welch one-way test	N	N	N	N	N	N	N
Cytochrome c oxidase subunit 2	E0A2H0	COX2	5.70067e+06	1.1361	Down	0.029079	0.126919	1.02231	Up	0.723688	0.90044	1.1113	Down	0.139002	0.448211	5.83009e+06	5.13168e+06	5.24619e+06	0.880205	-0.184088	1.02231	0.0318397	0.899847	-0.152249	Ovis aries musimon	9938	Welch one-way test	N	N	Y	N	N	Y	Y
UDP-glucuronosyltransferase	F1CGW0	UGT1A6	97962.4	1.17396	Up	0.343181	0.545499	1.03879	Down	0.740199	0.908008	1.13013	Up	0.353445	0.661662	100623	118128	113717	1.17396	0.231385	0.962663	-0.0548979	1.13013	0.176487	Ovis aries	9940	Welch one-way test	Y	N	N	N	N	N	N
Acetyl-Coenzyme A acyltransferase 2	G3CH53	ACAA2	5.64434e+06	1.18111	Down	0.023922	0.115456	1.06083	Up	0.256196	0.700719	1.11338	Down	0.094048	0.38764	5.73105e+06	4.85225e+06	5.14742e+06	0.846659	-0.240146	1.06083	0.085197	0.898164	-0.154949	Ovis aries	9940	Welch one-way test	N	N	N	N	N	N	N
Aldehyde dehydrogenase 1 family member L1 (Fragment)	I1U3B9	NA	1.09704e+06	1.00284	Up	0.965265	0.97514	1.07292	Up	0.116714	0.576275	1.07597	Up	0.225303	0.552762	1039487	1.04244e+06	1.11845e+06	1.00284	0.00409083	1.07292	0.101544	1.07597	0.105634	Ovis aries	9940	Welch one-way test	N	N	N	N	N	N	N
Peptidyl-prolyl cis-trans isomerase	K4P1S5	PPIA	1.20896e+07	1.11332	Down	0.00259	0.0453907	1.08058	Up	0.070431	0.510463	1.0303	Down	0.483641	0.749169	1.20585e+07	1.08311e+07	1.17039e+07	0.898214	-0.154869	1.08058	0.111807	0.970593	-0.0430621	Ovis aries	9940	Welch one-way test	N	Y	Y	N	Y	Y	Y
Ferritin	K4PF69	FTH1	463203	1.20092	Down	0.722806	0.834115	2.36903	Up	0.038964	0.41198	1.97269	Up	0.116892	0.420316	578986	482121	1.14216e+06	0.832698	-0.264134	2.36903	1.2443	1.97269	0.980161	Ovis aries	9940	Welch one-way test	N	N	Y	Y	Y	Y	Y
11 beta-hydroxysteroid dehydrogenase type 2	O19059	11 beta -HSD2	651805	1.06997	Up	0.473572	0.654288	1.1089	Up	0.303114	0.721265	1.18649	Up	0.097577	0.391784	641092	685948	760649	1.06997	0.0975696	1.1089	0.14913	1.18649	0.2467	Ovis aries	9940	Welch one-way test	N	N	N	N	N	N	N
Macrophage migration inhibitory factor (Fragment)	Q30DR4	MIF	4.18673e+06	1.08926	Up	0.215064	0.42989	1.1125	Down	0.062696	0.50642	1.02134	Down	0.804112	0.912731	4.4786e+06	4.87835e+06	4.38504e+06	1.08926	0.123347	0.898876	-0.153805	0.979109	-0.0304585	Ovis aries	9940	Welch one-way test	N	Y	Y	Y	Y	Y	Y
Galectin	Q6J275	NA	516650	1.27709	Up	0.055111	0.184628	1.15836	Down	0.333364	0.740399	1.1025	Up	0.608733	0.827709	527282	673386	581329	1.27709	0.352859	0.863293	-0.212077	1.1025	0.140781	Ovis aries	9940	Welch one-way test	N	N	N	N	N	N	N
Calponin (Fragment)	Q8HYX4	NA	71308	1.24988	Up	0.330557	0.533431	1.06881	Down	0.793087	0.943582	1.16941	Up	0.656841	0.850468	85207.1	106498	99642.3	1.24988	0.321785	0.935623	-0.0960002	1.16941	0.225785	Ovis aries	9940	Welch one-way test	N	N	N	N	N	N	N
NA	W5N5	NA	NA	1.00847	Down	0.850576	0.898336	1.02269	Down	0.470816	0.843412	1.03135	Down	0.310624	0.627603	1.02762e+06	1.01899e+06	996378	0.991601	-0.0121689	0.977814	-0.0323687	0.969601	-0.0445376	NA	NA	Welch one-way test	N	N	N	N	N	N	N
Hydroxyacid oxidase 1	W5NPE4	HAO1	946207	1.32455	Down	0.018554	0.105451	1.22505	Up	0.03733	0.41198	1.08122	Down	0.50735	0.765928	908789	686112	840524	0.754974	-0.405501	1.22505	0.292845	0.924884	-0.112656	Ovis aries	9940	Welch one-way test	N	N	N	N	N	N	N
Polyadenylate-binding protein	W5NPI6	PABPC1	447323	1.26402	Up	0.006827	0.0751817	1.06421	Down	0.294732	0.720737	1.18775	Up	0.005885	0.131074	452306	571722	537227	1.26402	0.338016	0.939665	-0.0897823	1.18775	0.248233	Ovis aries	9940	Welch one-way test	N	N	Y	Y	N	Y	Y
A2M_recep domain-containing protein	W5NPK5	NA	298781	1.44178	Up	0.008381	0.0764594	1.21903	Down	0.046766	0.440528	1.18273	Up	0.130022	0.43594	311197	448678	368063	1.44178	0.527852	0.820327	-0.28573	1.18273	0.242122	Ovis aries	9940	Welch one-way test	N	N	N	N	N	N	N
Uncharacterized protein	W5NPL9	NA	625861	1.14921	Up	0.059437	0.188649	1.05139	Down	0.370348	0.767913	1.09304	Up	0.133108	0.438086	626959	720509	685293	1.14921	0.200644	0.951123	-0.0722961	1.09304	0.128348	Ovis aries	9940	Welch one-way test	N	N	N	N	N	N	N
Heat shock protein family A (Hsp70) member 8	W5NPN4	HSPA8	1.51063e+06	1.27482	Up	0.011047	0.0834315	1.09922	Down	0.155711	0.611998	1.15975	Up	0.001026	0.0736855	1.4979e+06	1.90954e+06	1.73718e+06	1.27482	0.350288	0.909736	-0.13648	1.15975	0.213809	Ovis aries	9940	Welch one-way test	N	N	Y	Y	Y	Y	Y
Nicotinate phosphoribosyltransferase	W5NPU0	NAPRT	361896	1.08875	Down	0.333887	0.537211	1.00411	Up	0.953115	0.980007	1.08429	Down	0.313782	0.629157	375550	344938	346357	0.918488	-0.122667	1.00411	0.00592235	0.922266	-0.116744	Ovis aries	9940	Welch one-way test	N	N	N	N	N	N	N
Enoyl-CoA delta isomerase 2	W5NQ36	ECI2	1.13168e+06	1.07107	Up	0.707759	0.829569	1.05379	Up	0.702778	0.899829	1.12867	Up	0.513028	0.769041	1.00998e+06	1.08175e+06	1.13993e+06	1.07107	0.0990465	1.05379	0.0755811	1.12867	0.174628	Ovis aries	9940	Welch one-way test	N	N	N	N	N	N	N
Fibrinogen beta chain	W5NQ46	FGB	379753	1.65571	Up	0.223604	0.439421	1.50414	Down	0.239647	0.700719	1.10077	Up	0.659001	0.850671	405592	671544	446464	1.65571	0.727453	0.664832	-0.588938	1.10077	0.138516	Ovis aries	9940	Welch one-way test	N	Y	Y	Y	Y	Y	Y
Arginyl aminopeptidase	W5NQ97	RNPEP	62485.1	1.08946	Down	0.364612	0.566472	1.01277	Down	0.883202	0.967839	1.10337	Down	0.339344	0.645571	66884.5	61392.4	60618.5	0.917887	-0.123612	0.987394	-0.0183019	0.906316	-0.141914	Ovis aries	9940	Welch one-way test	N	N	N	N	N	N	N
Enoyl-CoA hydratase, short chain 1	W5NQC6	ECHS1	2.86717e+06	1.11125	Down	0.392371	0.594595	1.002	Down	0.985738	0.990754	1.11348	Down	0.302012	0.623023	3.0814e+06	2.7729e+06	2.76737e+06	0.899884	-0.15219	0.998005	-0.00288161	0.898088	-0.155071	Ovis aries	9940	Welch one-way test	N	N	N	N	N	N	N
Ribosomal protein L27a	W5NQC8	RPL27A	607794	1.24269	Up	0.007671	0.0764594	1.10832	Down	0.129012	0.590469	1.12124	Up	0.081363	0.375888	630678	783735	707138	1.24269	0.313463	0.902267	-0.148374	1.12124	0.165089	Ovis aries	9940	Welch one-way test	N	N	N	N	N	N	N
Obg-like ATPase 1	W5NQL2	OLA1	198346	1.01632	Up	0.878879	0.920841	1.07519	Down	0.194113	0.670758	1.05792	Down	0.63198	0.836288	232977	236779	220222	1.01632	0.0233579	0.930072	-0.104586	0.945252	-0.0812284	Ovis aries	9940	Welch one-way test	N	N	N	N	Y	Y	Y
Superoxide dismutase [Cu-Zn]	W5NQP5	SOD3	91741.5	1.80827	Up	0.011385	0.0840472	1.04804	Down	0.830879	0.947178	1.72538	Up	0.102634	0.40247	97959.4	177137	169017	1.80827	0.854607	0.95416	-0.0676973	1.72538	0.78691	Ovis aries	9940	Welch one-way test	N	Y	N	N	N	N	Y
Solute carrier family 22 member 8	W5NQX8	SLC22A8	1.72732e+06	1.45707	Down	0.010583	0.0832316	1.43147	Up	0.000433	0.114023	1.01788	Down	0.883651	0.951069	1.57829e+06	1.08319e+06	1550559	0.686307	-0.543074	1.43147	0.5175	0.98243	-0.0255742	Ovis aries	9940	Welch one-way test	Y	N	N	N	N	N	N
Heterogeneous nuclear ribonucleoprotein D	W5NR04	HNRNPD	560783	1.05629	Up	0.325785	0.529812	1.00306	Up	0.950287	0.980007	1.05953	Up	0.320554	0.633611	582256	615033	616916	1.05629	0.0790122	1.00306	0.00440954	1.05953	0.0834217	Ovis aries	9940	Welch one-way test	N	N	N	N	N	N	N
RB binding protein 9, serine hydrolase	W5NR38	RBBP9	410649	1.09933	Down	0.449006	0.642599	1.04324	Up	0.691833	0.899183	1.05377	Down	0.606387	0.825941	396684	360843	376444	0.909647	-0.136621	1.04324	0.0610671	0.948978	-0.0755538	Ovis aries	9940	Welch one-way test	N	N	N	N	N	N	N
Protein S100	W5NRA2	S100A2	424630	1.57835	Up	0.031516	0.132434	1.05552	Down	0.750343	0.91336	1.49533	Up	0.080045	0.375888	410369	647705	613638	1.57835	0.658416	0.947404	-0.0779484	1.49533	0.580467	Ovis aries	9940	Welch one-way test	N	N	N	N	N	N	N
Uncharacterized protein	W5NRA9	NA	520822	1.25994	Up	0.233933	0.449852	1.09751	Down	0.629027	0.870283	1.14801	Up	0.515684	0.769663	500735	630897	574846	1.25994	0.333357	0.911157	-0.134228	1.14801	0.199129	Ovis aries	9940	Welch one-way test	N	N	N	N	N	N	N
ER lipid raft associated 2	W5NRD1	ERLIN2	167766	1.02174	Up	0.696791	0.822817	1.09208	Down	0.096418	0.563589	1.06884	Down	0.249146	0.567146	167620	171265	156825	1.02174	0.0310318	0.915686	-0.127076	0.935595	-0.096044	Ovis aries	9940	Welch one-way test	N	N	N	N	N	N	N
Uncharacterized protein	W5NRE6	NA	77504.6	1.01097	Down	0.848188	0.897013	1.03668	Down	0.52105	0.846103	1.04805	Down	0.556521	0.797916	73457.7	72660.8	70090.2	0.989152	-0.0157365	0.964622	-0.0519645	0.954157	-0.067701	Ovis aries	9940	Welch one-way test	N	N	N	N	N	N	N
Uncharacterized protein	W5NRG0	PTGR2	389667	1.07126	Down	0.47095	0.654288	1.00136	Up	0.988474	0.992242	1.06981	Down	0.504067	0.764324	399309	372746	373252	0.933476	-0.0993147	1.00136	0.00195944	0.934745	-0.0973552	Ovis aries	9940	Welch one-way test	N	N	N	N	N	N	N
Hydroxysteroid 17-beta dehydrogenase 4	W5NRH5	HSD17B4	1.4811e+06	1.3914	Down	0.039934	0.153892	1.1112	Up	0.428698	0.818047	1.25216	Down	0.114395	0.416461	1.46066e+06	1.04978e+06	1.16651e+06	0.7187	-0.476539	1.1112	0.152118	0.798619	-0.324421	Ovis aries	9940	Welch one-way test	N	N	N	N	N	N	N
A2M_N_2 domain-containing protein	W5NRI1	NA	283446	1.64421	Up	0.003338	0.0502603	1.34475	Down	0.017236	0.340411	1.22269	Up	0.10291	0.40247	306114	503314	374282	1.64421	0.717391	0.743635	-0.427333	1.22269	0.290057	Ovis aries	9940	Welch one-way test	N	N	N	N	N	N	N
Glutamate dehydrogenase	W5NRK4	GLUD1	6.29639e+06	1.04916	Up	0.454642	0.646339	1.05931	Down	0.338334	0.740399	1.00967	Down	0.848159	0.933211	6.43595e+06	6.75232e+06	6.37429e+06	1.04916	0.069231	0.944015	-0.083119	0.99042	-0.013888	Ovis aries	9940	Welch one-way test	N	N	Y	N	N	Y	Y
Aldehyde dehydrogenase 6 family member A1	W5NS43	ALDH6A1	1.34452e+07	1.06875	Up	0.273437	0.486265	1.02489	Up	0.711631	0.90044	1.09535	Up	0.18791	0.529148	1.34347e+07	14358330	1.47157e+07	1.06875	0.0959188	1.02489	0.0354697	1.09535	0.131389	Ovis aries	9940	Welch one-way test	Y	N	Y	Y	N	Y	Y
Acetyl-CoA acyltransferase 1	W5NS74	ACAA1	5.94173e+06	1.02046	Down	0.793726	0.872105	1.09948	Up	0.245936	0.700719	1.07743	Up	0.484686	0.749319	6.31951e+06	6.19279e+06	6.80882e+06	0.979949	-0.0292216	1.09948	0.136816	1.07743	0.107594	Ovis aries	9940	Welch one-way test	N	N	Y	N	N	Y	Y
Alpha-2-macroglobulin	W5NSA6	A2M	623986	1.36021	Down	0.05552	0.184628	1.07701	Down	0.572793	0.858521	1.46495	Down	0.003559	0.108139	588944	432982	402023	0.735182	-0.443826	0.928499	-0.107028	0.682616	-0.550854	Ovis aries	9940	Welch one-way test	N	Y	Y	Y	Y	Y	Y
NPC intracellular cholesterol transporter 2	W5NSH8	NPC2	593295	1.16915	Up	0.277179	0.488775	1.01957	Down	0.876571	0.967166	1.14671	Up	0.237303	0.562971	622718	728054	714078	1.16915	0.225466	0.980803	-0.027964	1.14671	0.197502	Ovis aries	9940	Welch one-way test	N	Y	N	N	N	N	Y
Oxidative stress responsive kinase 1	W5NSJ5	OXSR1	94761.8	1.35254	Up	0.012502	0.0885072	1.0072	Up	0.934133	0.973233	1.36227	Up	0.005973	0.131074	93576.5	126566	127476	1.35254	0.435668	1.0072	0.0103448	1.36227	0.446013	Ovis aries	9940	Welch one-way test	N	N	N	N	N	N	N
40S ribosomal protein S8	W5NSP2	RPS8	749190	1.1695	Up	0.026278	0.121688	1.12602	Down	0.062453	0.50642	1.03861	Up	0.427762	0.706971	745104	871396	773876	1.1695	0.225888	0.888087	-0.171227	1.03861	0.0546608	Ovis aries	9940	Welch one-way test	N	N	N	N	N	N	N
LIM zinc-binding domain-containing protein	W5NT32	NA	102469	1.1992	Down	0.063828	0.193196	1.04656	Up	0.53168	0.849376	1.14585	Down	0.03579	0.26578	105811	88234.7	92342.9	0.833888	-0.262074	1.04656	0.0656549	0.872714	-0.196419	Ovis aries	9940	Welch one-way test	N	N	N	N	N	N	N
Xylulokinase	W5NT64	XYLB	329020	1.04862	Down	0.729578	0.836237	1.09786	Down	0.331901	0.740399	1.15123	Down	0.295001	0.616536	359675	343000	312426	0.953639	-0.0684853	0.910862	-0.134695	0.868633	-0.203181	Ovis aries	9940	Welch one-way test	N	N	N	N	N	N	N
Histone cluster 1 H1 family member c	W5NTA0	HIST1H1C	4.11234e+06	1.01216	Down	0.843408	0.896088	1.03061	Up	0.608651	0.867498	1.01824	Up	0.841241	0.928185	4.00094e+06	3.95289e+06	4.0739e+06	0.987988	-0.0174343	1.03061	0.0435049	1.01824	0.0260706	Ovis aries	9940	Welch one-way test	N	N	N	N	N	N	N
Tubulointerstitial nephritis antigen like 1	W5NTG6	TINAGL1	144167	1.04813	Down	0.754172	0.848712	1.08314	Down	0.551917	0.8504	1.13527	Down	0.197783	0.535236	142746	136191	125737	0.954082	-0.0678147	0.923237	-0.115226	0.880844	-0.183041	Ovis aries	9940	Welch one-way test	N	N	N	N	Y	Y	Y
Electron transfer flavoprotein subunit alpha	W5NTP6	NA	3.07697e+06	1.00125	Up	0.984341	0.984843	1.00577	Down	0.929622	0.970531	1.00451	Down	0.951488	0.981109	3.12288e+06	3.12679e+06	3.10887e+06	1.00125	0.00180852	0.994268	-0.00829351	0.995515	-0.00648499	Ovis aries	9940	Welch one-way test	N	N	N	N	N	N	N
Dihydrolipoamide S-succinyltransferase	W5NTS6	DLST	2.82265e+06	1.02215	Down	0.647808	0.783719	1.12631	Up	0.079556	0.537161	1.1019	Up	0.24281	0.567146	2.88857e+06	2.82597e+06	3.18292e+06	0.97833	-0.0316072	1.12631	0.171605	1.1019	0.139998	Ovis aries	9940	Welch one-way test	N	N	N	N	Y	Y	Y
Collagen type I alpha 2 chain	W5NTT7	COL1A2	1.12857e+06	1.02554	Down	0.926011	0.947114	1.46493	Up	0.218742	0.688867	1.42845	Up	0.399923	0.693696	1.10673e+06	1.07917e+06	1.58091e+06	0.975097	-0.0363826	1.46493	0.550831	1.42845	0.514448	Ovis aries	9940	Welch one-way test	N	N	Y	Y	Y	Y	Y
Renin binding protein	W5NTZ3	RENBP	95383.7	1.1823	Down	0.019356	0.107516	1.17109	Up	0.026735	0.377154	1.00958	Down	0.892166	0.953454	93675.7	79231.6	92787	0.845807	-0.241599	1.17109	0.227847	0.990513	-0.0137522	Ovis aries	9940	Welch one-way test	Y	N	N	N	N	N	N
FABP domain-containing protein	W5NU39	FABP3	1.90079e+06	1.17773	Down	0.158711	0.348282	1.01327	Up	0.921008	0.969632	1.16231	Down	0.288605	0.608115	1814287	1.54049e+06	1.56094e+06	0.849088	-0.236013	1.01327	0.0190235	0.860359	-0.21699	Ovis aries	9940	Welch one-way test	N	N	N	N	N	N	N
Proline and arginine rich end leucine rich repeat protein	W5NUA0	PRELP	280720	1.08476	Up	0.488106	0.664834	1.09302	Up	0.494103	0.846103	1.18567	Up	0.241998	0.567146	283377	307395	335990	1.08476	0.117374	1.09302	0.128325	1.18567	0.245699	Ovis aries	9940	Welch one-way test	N	N	N	N	N	N	N
Peroxiredoxin	W5NUE3	PRDX1	3.94495e+06	1.29437	Down	0.00135	0.0323182	1.1126	Up	0.290011	0.718209	1.16337	Down	0.213478	0.544025	3.91673e+06	3.02597e+06	3366709	0.772576	-0.372252	1.1126	0.15394	0.859571	-0.218311	Ovis aries	9940	Welch one-way test	N	N	Y	Y	Y	Y	Y
Aspartate aminotransferase	W5NUG0	GOT2	1.08444e+06	1.07023	Down	0.420029	0.622465	1.04679	Up	0.463486	0.843412	1.02238	Down	0.81474	0.918181	1.20901e+06	1.12968e+06	1.18254e+06	0.934383	-0.0979147	1.04679	0.0659769	0.978106	-0.0319378	Ovis aries	9940	Welch one-way test	N	N	N	N	Y	Y	Y
Glucosamine-6-phosphate isomerase	W5NUG3	GNPDA1	550319	1.19369	Up	0.131668	0.308394	1.08091	Up	0.332029	0.740399	1.29027	Up	0.012755	0.186601	601576	718096	776196	1.19369	0.255431	1.08091	0.112244	1.29027	0.367675	Ovis aries	9940	Welch one-way test	N	N	N	N	Y	Y	Y
N-ribosyldihydronicotinamide:quinone reductase 2	W5NUJ5	NQO2	1.41199e+06	1.0588	Up	0.426551	0.625284	1.07105	Down	0.431264	0.819255	1.01157	Down	0.899103	0.953454	1.38246e+06	1.46375e+06	1.36665e+06	1.0588	0.0824251	0.933662	-0.0990278	0.988558	-0.0166026	Ovis aries	9940	Welch one-way test	N	N	N	N	Y	Y	Y
NIMA related kinase 9	W5NUK4	NEK9	170912	1.17513	Up	0.014242	0.0907754	1.07256	Down	0.169459	0.631764	1.09563	Up	0.08589	0.383351	170908	200839	187252	1.17513	0.23282	0.932348	-0.10106	1.09563	0.131761	Ovis aries	9940	Welch one-way test	N	N	N	N	N	N	N
AFG3 like matrix AAA peptidase subunit 2	W5NUL7	AFG3L2	205157	1.05953	Up	0.283653	0.492496	1.01125	Up	0.809056	0.946015	1.07145	Up	0.07086	0.352072	201091	213061	215459	1.05953	0.0834194	1.01125	0.0161468	1.07145	0.0995662	Ovis aries	9940	Welch one-way test	N	N	N	N	N	N	N
Peroxiredoxin	W5NUN0	PRDX3	2.63657e+06	1.0027	Up	0.947347	0.960724	1.04687	Up	0.13887	0.599493	1.04969	Up	0.289106	0.608115	2.69549e+06	2.70276e+06	2.82944e+06	1.0027	0.00388291	1.04687	0.0660838	1.04969	0.0699667	Ovis aries	9940	Welch one-way test	N	N	Y	Y	Y	Y	Y
Aldo-keto reductase family 1 member A1	W5NUN8	AKR1A1	9.0263e+06	1.1001	Down	0.147527	0.33016	1.04977	Up	0.267101	0.701029	1.04795	Down	0.443529	0.71654	8.95761e+06	8.14254e+06	8.54775e+06	0.909007	-0.137636	1.04977	0.0700666	0.954244	-0.0675695	Ovis aries	9940	Welch one-way test	N	N	N	N	Y	Y	Y
Amine oxidase	W5NUP4	NA	854825	1.02803	Up	0.800517	0.877127	1.0305	Down	0.747128	0.91085	1.0024	Down	0.970923	0.988563	828843	852073	826857	1.02803	0.0398775	0.970406	-0.0433392	0.997603	-0.0034617	Ovis aries	9940	Welch one-way test	N	N	N	N	N	N	N
NTR domain-containing protein	W5NUX8	LOC101123672	216515	1.79478	Up	0.000241	0.0155179	1.53633	Down	0.001625	0.128375	1.16823	Up	0.26196	0.582953	204790	367554	239241	1.79478	0.843808	0.650901	-0.61949	1.16823	0.224318	Ovis aries	9940	Welch one-way test	N	N	N	N	N	N	N
Uncharacterized protein	W5NV97	NA	810258	1.061	Down	0.311778	0.520273	1.01841	Down	0.681332	0.895594	1.08053	Down	0.068743	0.351315	785709	740533	727148	0.942503	-0.0854313	0.981926	-0.0263142	0.925468	-0.111745	Ovis aries	9940	Welch one-way test	N	N	N	N	N	N	N
Uncharacterized protein	W5NVC9	RAC1	796020	1.07314	Up	0.059327	0.188649	1.09361	Down	0.018368	0.349143	1.01908	Down	0.617242	0.83354	823407	883632	807994	1.07314	0.101839	0.914401	-0.129101	0.981281	-0.027262	Ovis aries	9940	Welch one-way test	N	N	Y	N	Y	Y	Y
Chromosome 11 open reading frame 54	W5NVR9	C11orf54	2.50416e+06	1.10448	Down	0.330862	0.533431	1.16887	Down	0.03171	0.389784	1.29099	Down	0.080823	0.375888	2.7655e+06	2.50389e+06	2.14215e+06	0.905402	-0.14337	0.855529	-0.225112	0.774597	-0.368481	Ovis aries	9940	Welch one-way test	Y	N	N	N	Y	Y	Y
N-acetyl-alpha-glucosaminidase	W5NVW7	NAGLU	83108.9	1.43303	Up	0.053565	0.183984	1.19391	Down	0.257747	0.700719	1.20028	Up	0.358171	0.665777	92234.7	132175	110708	1.43303	0.519069	0.837585	-0.255692	1.20028	0.263377	Ovis aries	9940	Welch one-way test	N	N	N	N	N	N	N
Clathrin light chain	W5NVY3	CLTB	198444	1.03276	Down	0.656079	0.789253	1.01289	Down	0.865436	0.965238	1.04607	Down	0.516411	0.769663	196394	190164	187744	0.968278	-0.0465061	0.987278	-0.018472	0.95596	-0.0649781	Ovis aries	9940	Welch one-way test	N	N	N	N	N	N	N
TNF receptor associated protein 1	W5NW44	TRAP1	74784.9	1.09919	Up	0.349357	0.548692	1.01445	Up	0.871656	0.967128	1.11507	Up	0.100857	0.398385	74784.9	82203	83390.7	1.09919	0.136444	1.01445	0.0206955	1.11507	0.157139	Ovis aries	9940	Welch one-way test	N	N	N	N	N	N	N
Myosin_tail_1 domain-containing protein	W5NW47	NA	283602	1.18985	Up	0.063432	0.192736	1.19299	Down	0.097023	0.563589	1.00264	Down	0.980707	0.991928	284689	338739	283940	1.18985	0.250785	0.838227	-0.254588	0.997368	-0.00380217	Ovis aries	9940	Welch one-way test	N	N	N	N	N	N	N
Elongation factor Tu	W5NWF7	TUFM	1.99387e+06	1.02793	Up	0.5059	0.685525	1.02407	Up	0.567254	0.855799	1.05267	Up	0.238986	0.565266	1.97974e+06	2.03503e+06	2084012	1.02793	0.0397366	1.02407	0.034313	1.05267	0.0740496	Ovis aries	9940	Welch one-way test	N	N	Y	Y	N	Y	Y
Cadherin 16	W5NWL5	CDH16	4.86442e+06	1.22557	Down	0.061742	0.189791	1.23931	Up	0.018675	0.349143	1.01121	Up	0.863649	0.94108	4.65633e+06	3.79933e+06	4.70855e+06	0.815948	-0.29345	1.23931	0.309538	1.01121	0.0160876	Ovis aries	9940	Welch one-way test	Y	N	N	N	N	N	N
Apolipoprotein A4	W5NWM2	APOA4	288845	2.60547	Down	2.2e-05	0.013825	2.36449	Up	5e-06	0.00395	1.10192	Down	0.382367	0.678261	292550	112283	265492	0.383807	-1.38155	2.36449	1.24153	0.90751	-0.140014	Ovis aries	9940	Welch one-way test	N	Y	Y	Y	Y	Y	Y
Elongation factor G, mitochondrial	W5NWM6	GFM1	87394.8	1.0078	Up	0.924648	0.947114	1.03214	Up	0.670742	0.890049	1.0402	Up	0.439116	0.71265	88183.2	88871.1	91727.8	1.0078	0.0112105	1.03214	0.0456447	1.0402	0.0568552	Ovis aries	9940	Welch one-way test	N	N	N	N	N	N	N
DEAD-box helicase 3 X-linked	W5NWP4	DDX3X	97014	1.29226	Up	0.004541	0.0569427	1.10157	Down	0.12709	0.590469	1.17311	Up	0.002452	0.0880491	98966.4	127890	116098	1.29226	0.369896	0.907797	-0.139559	1.17311	0.230337	Ovis aries	9940	Welch one-way test	N	N	N	N	N	N	N
Erythrocyte membrane protein band 4.1	W5NX11	EPB41	91865.6	1.11295	Down	0.164317	0.357604	1.04115	Up	0.586446	0.863535	1.06896	Down	0.393741	0.688176	93522.6	84031.3	87489.1	0.898513	-0.154388	1.04115	0.0581765	0.935486	-0.0962118	Ovis aries	9940	Welch one-way test	N	N	Y	N	N	Y	Y
Apolipoprotein A1	W5NX51	APOA1	3.63151e+06	1.49575	Down	0.007537	0.0763363	1.0245	Down	0.847692	0.95805	1.5324	Down	0.002204	0.087058	3.93976e+06	2.63396e+06	2.57098e+06	0.66856	-0.580872	0.976087	-0.0349189	0.652572	-0.615791	Ovis aries	9940	Welch one-way test	N	Y	Y	Y	Y	Y	Y
Aminotran_5 domain-containing protein	W5NX82	NA	1.17744e+06	1.09246	Up	0.720838	0.834115	1.27036	Up	0.106931	0.568621	1.38782	Up	0.091477	0.386348	960377	1.04917e+06	1.33283e+06	1.09246	0.127579	1.27036	0.345242	1.38782	0.472821	Ovis aries	9940	Welch one-way test	N	N	N	N	N	N	N
Carboxylic ester hydrolase	W5NX87	CES2	976783	1.1476	Down	0.464482	0.650604	1.07515	Down	0.610249	0.867498	1.23384	Down	0.150789	0.46715	925006	806033	749695	0.871381	-0.198624	0.930104	-0.104535	0.810476	-0.303159	Ovis aries	9940	Welch one-way test	N	N	N	N	N	N	N
Ubiquitin-like domain-containing protein	W5NX91	RPS27A	1.75564e+06	1.03023	Up	0.755669	0.849187	1.01942	Up	0.801703	0.945292	1.05024	Up	0.36209	0.666743	1761934	1.81519e+06	1.85045e+06	1.03023	0.0429621	1.01942	0.0277527	1.05024	0.0707148	Ovis aries	9940	Welch one-way test	N	N	N	N	Y	Y	Y
Microtubule-associated protein	W5NXB5	MAP4	307592	1.24642	Up	0.003305	0.0502603	1.08828	Down	0.323653	0.740399	1.14531	Up	0.248765	0.567146	321737	401020	368489	1.24642	0.317794	0.918879	-0.122053	1.14531	0.195741	Ovis aries	9940	Welch one-way test	N	N	N	N	N	N	N
S4 RNA-binding domain-containing protein	W5NXM4	NA	351856	1.20697	Up	0.051023	0.179147	1.02955	Down	0.680542	0.895594	1.17233	Up	0.060964	0.345733	378345	456652	443547	1.20697	0.271393	0.971302	-0.0420078	1.17233	0.229385	Ovis aries	9940	Welch one-way test	N	N	N	N	N	N	N
FERM domain-containing protein	W5NXN2	NA	4.45168e+06	1.05046	Down	0.487684	0.664834	1.02604	Up	0.612092	0.867498	1.0238	Down	0.695455	0.870696	4.2403e+06	4.03662e+06	4141724	0.951966	-0.0710187	1.02604	0.037085	0.976753	-0.0339336	Ovis aries	9940	Welch one-way test	N	N	N	N	N	N	N
Cytochrome c oxidase subunit 5A	W5NXT8	COX5A	2.45435e+06	1.07257	Down	0.291044	0.502368	1.01668	Up	0.817627	0.946015	1.05497	Down	0.424589	0.706971	2.42653e+06	2.26235e+06	2.3001e+06	0.932341	-0.10107	1.01668	0.0238725	0.947897	-0.0771972	Ovis aries	9940	Welch one-way test	N	N	N	N	N	N	N
Immunoglobulin heavy constant mu	W5NXW9	IGHM	419886	1.68491	Up	0.043548	0.163047	1.08968	Up	0.641496	0.872258	1.83601	Up	0.009507	0.159799	429755	724100	789037	1.68491	0.752674	1.08968	0.123903	1.83601	0.876577	Ovis aries	9940	Welch one-way test	N	N	Y	Y	Y	Y	Y
Catenin beta 1	W5NY24	CTNNB1	128940	1.07321	Down	0.167713	0.362653	1.01906	Up	0.594193	0.866075	1.05314	Down	0.366745	0.669119	122183	113848	116018	0.931785	-0.101931	1.01906	0.0272397	0.949545	-0.0746914	Ovis aries	9940	Welch one-way test	N	N	Y	N	N	Y	Y
Eukaryotic translation initiation factor 3 subunit C	W5NY25	EIF3C	149874	1.16132	Up	0.032532	0.134556	1.05681	Down	0.349923	0.75324	1.0989	Up	0.107835	0.405665	144775	168131	159093	1.16132	0.215769	0.946246	-0.0797127	1.0989	0.136057	Ovis aries	9940	Welch one-way test	N	N	N	N	N	N	N
ATP synthase subunit alpha	W5NY50	ATP5F1A	3.6431e+07	1.00966	Up	0.845008	0.896088	1.07452	Up	0.206738	0.681177	1.0849	Up	0.211024	0.5423	3.55452e+07	3.58884e+07	3.8563e+07	1.00966	0.013864	1.07452	0.103697	1.0849	0.117561	Ovis aries	9940	Welch one-way test	N	N	N	N	Y	Y	Y
Uncharacterized protein	W5NYA7	LOC101114319	1.24858e+07	1.38075	Down	0.000901	0.0272696	1.08849	Up	0.297237	0.720737	1.2685	Down	0.001989	0.087058	1.25289e+07	9.07399e+06	9.87694e+06	0.724244	-0.465453	1.08849	0.122327	0.788331	-0.343126	Ovis aries	9940	Welch one-way test	N	N	N	N	N	N	N
ATP synthase inhibitory factor subunit 1	W5NYG6	ATP5IF1	57345.6	1.14848	Up	0.258642	0.472725	1.02525	Down	0.790174	0.943225	1.1202	Up	0.410264	0.701534	54789.9	62925.2	61375.5	1.14848	0.199728	0.975372	-0.035975	1.1202	0.163753	Ovis aries	9940	Welch one-way test	N	N	N	N	N	N	N
Nucleoside diphosphate kinase	W5NYH2	NME1-NME2	3.0683e+06	1.09877	Up	0.088176	0.238558	1.00713	Down	0.898188	0.967839	1.09099	Up	0.171658	0.502616	3.10314e+06	3.40964e+06	3385514	1.09877	0.135889	0.992924	-0.0102446	1.09099	0.125644	Ovis aries	9940	Welch one-way test	N	N	N	N	N	N	N
FERM, ARH/RhoGEF and pleckstrin domain protein 1	W5NYI9	FARP1	32088.3	1.02473	Down	0.803779	0.878265	1.28492	Down	0.040155	0.41198	1.3167	Down	0.03074	0.252965	33085.7	32287.1	25127.8	0.975863	-0.0352499	0.778261	-0.361673	0.759476	-0.396923	Ovis aries	9940	Welch one-way test	N	N	N	N	N	N	N
Paraoxonase 3	W5NYJ0	PON3	1.0084e+06	1.12552	Down	0.326963	0.529812	1.04104	Up	0.724911	0.90044	1.08114	Down	0.518016	0.769663	960430	853323	888346	0.888481	-0.170587	1.04104	0.0580289	0.924946	-0.112558	Ovis aries	9940	Welch one-way test	N	Y	N	N	N	N	Y
Transcription factor A, mitochondrial	W5NYJ3	TFAM	509770	1.01879	Up	0.790699	0.870106	1.00286	Down	0.965938	0.981349	1.01589	Up	0.855863	0.937766	478884	487884	486492	1.01879	0.0268623	0.997147	-0.00412239	1.01589	0.0227399	Ovis aries	9940	Welch one-way test	N	N	N	N	N	N	N
Calumenin	W5NYK9	CALU	16712	1.10733	Down	0.259101	0.472725	1.07709	Up	0.484972	0.846103	1.02807	Down	0.801413	0.912731	17523.2	15824.7	17044.7	0.903071	-0.147088	1.07709	0.107145	0.972693	-0.039943	Ovis aries	9940	Welch one-way test	N	N	N	N	N	N	N
Amine oxidase	W5NYL0	MAOA	1.22709e+06	1.08915	Down	0.306036	0.514401	1.04821	Up	0.589959	0.864689	1.03906	Down	0.644165	0.845857	1258813	1.15577e+06	1.21149e+06	0.918145	-0.123207	1.04821	0.0679297	0.96241	-0.055277	Ovis aries	9940	Welch one-way test	N	N	N	N	N	N	N
Serine and arginine rich splicing factor 6	W5NYS1	SRSF6	195779	1.18753	Up	0.222993	0.439421	1.14258	Down	0.299203	0.721265	1.03935	Up	0.783539	0.907403	203330	241461	211330	1.18753	0.247967	0.875215	-0.192291	1.03935	0.0556759	Ovis aries	9940	Welch one-way test	N	N	N	N	N	N	N
Membrane palmitoylated protein 1	W5NYU9	MPP1	233515	1.21915	Up	0.019438	0.107516	1.01278	Down	0.875231	0.967128	1.20377	Up	0.050648	0.307784	237575	289639	285985	1.21915	0.285871	0.987385	-0.0183154	1.20377	0.267555	Ovis aries	9940	Welch one-way test	N	N	Y	N	N	Y	Y
USH1 protein network component harmonin	W5NYV3	USH1C	50786.2	1.05377	Up	0.457463	0.64743	1.07871	Down	0.287763	0.718209	1.02367	Down	0.784502	0.907403	47998.2	50578.9	46888.2	1.05377	0.0755554	0.927031	-0.109311	0.976874	-0.0337554	Ovis aries	9940	Welch one-way test	Y	N	N	N	N	N	N
Uncharacterized protein	W5NYZ2	NA	205939	1.37775	Down	0.067096	0.200022	1.13582	Up	0.209928	0.681177	1.213	Down	0.188216	0.529148	212405	154168	175108	0.725822	-0.462313	1.13582	0.183738	0.824405	-0.278575	Ovis aries	9940	Welch one-way test	N	N	N	N	N	N	N
Calnexin	W5NYZ5	CANX	361389	1.06917	Up	0.567747	0.723459	1.17363	Down	0.135652	0.595362	1.09771	Down	0.184891	0.523526	375533	401507	342107	1.06917	0.0964847	0.852058	-0.230977	0.91099	-0.134492	Ovis aries	9940	Welch one-way test	N	N	Y	N	N	Y	Y
Retinol-binding protein	W5NZ47	RBP4	2.13371e+06	1.01186	Down	0.94104	0.956785	1.18802	Up	0.229557	0.694461	1.17409	Up	0.143748	0.455908	2046533	2.02254e+06	2.40282e+06	0.988278	-0.017011	1.18802	0.248557	1.17409	0.231546	Ovis aries	9940	Welch one-way test	N	Y	Y	Y	Y	Y	Y
Amine oxidase	W5NZA9	MAOB	4.87998e+06	1.07055	Down	0.403106	0.604277	1.06422	Up	0.44948	0.837475	1.00594	Down	0.930607	0.97246	5.02458e+06	4.69347e+06	4.99489e+06	0.934102	-0.0983476	1.06422	0.0897982	0.994091	-0.00854947	Ovis aries	9940	Welch one-way test	N	N	Y	N	N	Y	Y
Sulfotransferase	W5NZJ5	LOC101114075	645300	1.55909	Up	0.07625	0.214368	1.33109	Down	0.112959	0.572036	1.17129	Up	0.125358	0.429263	721022	1.12414e+06	844524	1.55909	0.640707	0.751263	-0.41261	1.17129	0.228096	Ovis aries	9940	Welch one-way test	N	N	N	N	N	N	N
Membrane metalloendopeptidase	W5NZL3	MME	3.13448e+06	1.01061	Down	0.92331	0.947114	1.02177	Down	0.818581	0.946015	1.03261	Down	0.727973	0.878013	3.22185e+06	3.18803e+06	3.12011e+06	0.989501	-0.0152265	0.978697	-0.0310665	0.968422	-0.0462929	Ovis aries	9940	Welch one-way test	Y	N	Y	N	Y	Y	Y
Uncharacterized protein	W5NZM0	NA	507172	1.0378	Down	0.742244	0.840866	1.08193	Down	0.208533	0.681177	1.12283	Down	0.335771	0.643833	537962	518366	479114	0.963574	-0.0535329	0.924277	-0.113603	0.890609	-0.167136	Ovis aries	9940	Welch one-way test	N	N	N	N	N	N	N
Leucine aminopeptidase 3	W5NZQ2	LAP3	3.92644e+06	1.10804	Down	0.051345	0.17948	1.12009	Up	0.010082	0.2594	1.01087	Up	0.78061	0.90639	3.81917e+06	3.44676e+06	3.8607e+06	0.90249	-0.148016	1.12009	0.16362	1.01087	0.0156034	Ovis aries	9940	Welch one-way test	N	N	Y	Y	Y	Y	Y
PDZK1 interacting protein 1	W5NZR4	PDZK1IP1	693853	1.23306	Down	0.016592	0.098554	1.15767	Up	0.080544	0.537161	1.06512	Down	0.432936	0.712454	731947	593602	687195	0.81099	-0.302244	1.15767	0.211224	0.938859	-0.0910194	Ovis aries	9940	Welch one-way test	Y	N	N	N	Y	Y	Y
Spectrin beta chain	W5NZX9	SPTBN1	1.11291e+06	1.01524	Down	0.676643	0.805532	1.03577	Up	0.311905	0.729668	1.02022	Up	0.529783	0.777934	1.11542e+06	1.09868e+06	1.13798e+06	0.984988	-0.0218212	1.03577	0.0507058	1.02022	0.0288846	Ovis aries	9940	Welch one-way test	N	N	Y	Y	N	Y	Y
Nidogen 1	W5P094	NID1	938895	1.16388	Up	0.121861	0.29713	1.17439	Down	0.069952	0.510463	1.00904	Down	0.900065	0.953454	922638	1.07384e+06	914376	1.16388	0.218939	0.851503	-0.231916	0.991045	-0.012977	Ovis aries	9940	Welch one-way test	N	N	Y	Y	Y	Y	Y
LDL receptor related protein 2	W5P0B2	LRP2	3.58792e+06	1.00384	Down	0.897799	0.934117	1.03835	Up	0.222927	0.691647	1.03438	Up	0.42231	0.706971	3.64635e+06	3632406	3.7717e+06	0.996177	-0.00552596	1.03835	0.0542904	1.03438	0.0487644	Ovis aries	9940	Welch one-way test	Y	N	Y	Y	Y	Y	Y
Uncharacterized protein	W5P0I2	NDUFA7	241743	1.066	Up	0.37659	0.578702	1.0105	Down	0.883392	0.967839	1.05493	Up	0.535409	0.781836	256029	272927	270091	1.066	0.0922074	0.989611	-0.0150664	1.05493	0.0771411	Ovis aries	9940	Welch one-way test	N	N	N	N	N	N	N
Uncharacterized protein	W5P0I6	NA	794700	1.11277	Up	0.127842	0.306046	1.03409	Down	0.617634	0.867498	1.07609	Up	0.335249	0.643833	807636	898716	869086	1.11277	0.15416	0.96703	-0.0483668	1.07609	0.105794	Ovis aries	9940	Welch one-way test	N	N	N	N	N	N	N
Aminopeptidase	W5P0N0	ENPEP	1.73427e+06	1.03049	Down	0.736371	0.837509	1.00539	Up	0.95452	0.980007	1.02496	Down	0.820534	0.920021	1758768	1.70673e+06	1.71594e+06	0.970413	-0.0433288	1.00539	0.00775862	0.975646	-0.0355702	Ovis aries	9940	Welch one-way test	Y	N	Y	Y	Y	Y	Y
Trimethyllysine hydroxylase, epsilon	W5P0Q7	TMLHE	468548	1.02735	Up	0.657147	0.789253	1.0067	Down	0.903593	0.967839	1.02051	Up	0.721328	0.877217	444599	456756	453718	1.02735	0.0389209	0.993347	-0.00963064	1.02051	0.0292902	Ovis aries	9940	Welch one-way test	N	N	N	N	N	N	N
Uncharacterized protein	W5P0V0	LOC101106384	2.27294e+06	1.1714	Up	0.114871	0.287177	1.16275	Down	0.137763	0.597982	1.00743	Up	0.936975	0.975244	2.2757e+06	2.66575e+06	2.29262e+06	1.1714	0.228228	0.860028	-0.217544	1.00743	0.0106834	Ovis aries	9940	Welch one-way test	N	N	N	N	N	N	N
Saccharopine dehydrogenase (putative)	W5P0V6	SCCPDH	389345	1.05397	Up	0.594374	0.745326	1.02788	Down	0.699997	0.899183	1.02539	Up	0.814115	0.918181	371606	391662	381040	1.05397	0.075835	0.97288	-0.0396667	1.02539	0.0361683	Ovis aries	9940	Welch one-way test	N	N	N	N	N	N	N
Alpha-1-B glycoprotein	W5P101	A1BG	253671	1.72252	Up	0.003629	0.0502603	1.41097	Down	0.012802	0.306472	1.22081	Up	0.09115	0.386348	241505	415998	294831	1.72252	0.78452	0.708733	-0.496686	1.22081	0.287834	Ovis aries	9940	Welch one-way test	N	Y	Y	Y	Y	Y	Y
Ribosomal protein S5	W5P114	RPS5	241510	1.01896	Up	0.812015	0.882382	1.15482	Down	0.025202	0.368696	1.13333	Down	0.119222	0.421136	251170	255932	221622	1.01896	0.0270992	0.865939	-0.207663	0.882358	-0.180564	Ovis aries	9940	Welch one-way test	N	N	N	N	N	N	N
Peptidase A1 domain-containing protein	W5P1A3	NA	3.17824e+06	1.25193	Up	0.142299	0.323035	1.19394	Up	0.262478	0.700719	1.49474	Up	0.063634	0.345733	3.40765e+06	4.26614e+06	5.09353e+06	1.25193	0.324157	1.19394	0.255733	1.49474	0.57989	Ovis aries	9940	Welch one-way test	N	N	N	N	N	N	N
60S ribosomal protein L6	W5P1D5	NA	910062	1.20717	Up	0.007402	0.0763363	1.05551	Down	0.358768	0.75952	1.14368	Up	0.063895	0.345733	909483	1.0979e+06	1.04016e+06	1.20717	0.271627	0.94741	-0.0779389	1.14368	0.193688	Ovis aries	9940	Welch one-way test	N	N	N	N	N	N	N
Heterogeneous nuclear ribonucleoprotein M	W5P1D7	HNRNPM	524752	1.21891	Up	0.069864	0.203663	1.07131	Down	0.470641	0.843412	1.13778	Up	0.247982	0.567146	546691	666366	622013	1.21891	0.28559	0.93344	-0.0993711	1.13778	0.186219	Ovis aries	9940	Welch one-way test	N	N	N	N	Y	Y	Y
Cathepsin C	W5P1H0	CTSC	233328	1.35815	Up	0.030565	0.130031	1.10786	Down	0.447866	0.83644	1.22592	Up	0.222717	0.552762	230708	313336	282830	1.35815	0.44164	0.90264	-0.147777	1.22592	0.293863	Ovis aries	9940	Welch one-way test	N	N	Y	Y	Y	Y	Y
Electron transfer flavoprotein-ubiquinone oxidoreductase	W5P1M1	ETFDH	282860	1.08576	Down	0.075479	0.212959	1.02374	Up	0.645567	0.874782	1.06058	Down	0.327674	0.636026	289172	266332	272656	0.921016	-0.118702	1.02374	0.0338513	0.942882	-0.0848506	Ovis aries	9940	Welch one-way test	N	N	N	N	N	N	N
AP complex subunit beta	W5P1Q0	AP1B1	296945	1.03849	Down	0.442937	0.638541	1.02146	Up	0.719542	0.90044	1.01667	Down	0.793093	0.912731	291435	280635	286658	0.962941	-0.0544807	1.02146	0.0306356	0.983608	-0.0238451	Ovis aries	9940	Welch one-way test	N	N	N	N	N	N	N
Dolichyl-diphosphooligosaccharide--protein glycosyltransferase subunit 1	W5P1S6	NA	382941	1.05736	Up	0.221833	0.439218	1.0258	Up	0.494369	0.846103	1.08463	Up	0.035998	0.26578	394298	416914	427669	1.05736	0.0804637	1.0258	0.0367434	1.08463	0.117207	Ovis aries	9940	Welch one-way test	N	N	N	N	N	N	N
Uncharacterized protein	W5P1W7	NA	546059	1.04942	Up	0.685398	0.814232	1.05228	Down	0.6448	0.874782	1.00273	Down	0.970186	0.988563	537249	563798	535788	1.04942	0.069588	0.95032	-0.0735145	0.997282	-0.00392647	Ovis aries	9940	Welch one-way test	N	N	N	N	N	N	N
Fructose-bisphosphate aldolase	W5P1X9	ALDOA	1.692e+06	1.07146	Down	0.241273	0.455994	1.03048	Up	0.660575	0.886	1.03976	Down	0.539155	0.783327	1.68825e+06	1.57566e+06	1.62369e+06	0.93331	-0.0995714	1.03048	0.0433194	0.961759	-0.0562521	Ovis aries	9940	Welch one-way test	N	N	Y	Y	Y	Y	Y
Transgelin	W5P214	TAGLN	1.57735e+06	1.38028	Up	0.012807	0.0885072	1.25113	Down	0.122168	0.588733	1.10323	Up	0.622215	0.833613	1.73001e+06	2.3879e+06	1908604	1.38028	0.464961	0.79928	-0.323228	1.10323	0.141734	Ovis aries	9940	Welch one-way test	N	N	N	N	Y	Y	Y
Pyruvate kinase	W5P276	PKLR	1.33405e+06	1.15451	Down	0.059249	0.188649	1.07836	Up	0.054313	0.487583	1.07061	Down	0.37606	0.674824	1.22512e+06	1.06117e+06	1.14432e+06	0.866172	-0.207275	1.07836	0.108838	0.934044	-0.0984373	Ovis aries	9940	Welch one-way test	Y	N	Y	N	Y	Y	Y
IlvB acetolactate synthase like	W5P2A5	ILVBL	565229	1.02284	Down	0.700697	0.826018	1.05529	Up	0.15496	0.611998	1.03173	Up	0.648847	0.845857	552631	540291	570166	0.977671	-0.0325796	1.05529	0.0776461	1.03173	0.0450665	Ovis aries	9940	Welch one-way test	N	N	N	N	N	N	N
Ankyrin 3	W5P2C2	ANK3	437734	1.01638	Down	0.764829	0.855828	1.07364	Up	0.171136	0.631764	1.05634	Up	0.195655	0.535236	442005	434882	466909	0.983884	-0.0234393	1.07364	0.102516	1.05634	0.0790771	Ovis aries	9940	Welch one-way test	N	N	Y	Y	N	Y	Y
Adenosylhomocysteinase like 2	W5P2N6	AHCYL2	276350	1.14823	Down	0.317849	0.522039	1.06516	Up	0.55075	0.8504	1.07799	Down	0.44346	0.71654	291625	253977	270527	0.870903	-0.199417	1.06516	0.0910765	0.927655	-0.10834	Ovis aries	9940	Welch one-way test	N	N	N	N	N	N	N
FERM domain-containing protein	W5P2V0	NA	1.08335e+06	1.1201	Up	0.247992	0.463153	1.00143	Up	0.98552	0.990754	1.1217	Up	0.30617	0.624206	1.08993e+06	1.22083e+06	1.22258e+06	1.1201	0.163628	1.00143	0.00205971	1.1217	0.165688	Ovis aries	9940	Welch one-way test	N	N	N	N	N	N	N
Propionyl-CoA carboxylase subunit alpha	W5P2V1	PCCA	816823	1.02443	Up	0.705727	0.828417	1.08367	Up	0.270733	0.708209	1.11015	Up	0.271963	0.597086	828638	848885	919913	1.02443	0.0348278	1.08367	0.115928	1.11015	0.150756	Ovis aries	9940	Welch one-way test	N	N	Y	Y	N	Y	Y
Peptidase D	W5P2V3	PEPD	908192	1.1958	Down	0.193922	0.401865	1.11145	Up	0.037638	0.41198	1.07589	Down	0.566718	0.803783	960478	803207	892727	0.836258	-0.25798	1.11145	0.152447	0.929461	-0.105533	Ovis aries	9940	Welch one-way test	Y	N	Y	Y	Y	Y	Y
Cytochrome b-c1 complex subunit Rieske, mitochondrial	W5P2X9	LOC101113001	253707	1.04808	Up	0.434484	0.628649	1.03923	Up	0.378191	0.773822	1.0892	Up	0.248845	0.567146	280124	293593	305110	1.04808	0.0677494	1.03923	0.0555143	1.0892	0.123264	Ovis aries	9940	Welch one-way test	N	N	N	N	N	N	N
14-3-3 protein beta/alpha	W5P303	YWHAB	676813	1.12139	Up	0.11689	0.289477	1.07778	Down	0.259567	0.700719	1.04046	Up	0.543181	0.784484	672726	754388	699946	1.12139	0.165289	0.927833	-0.108063	1.04046	0.0572255	Ovis aries	9940	Welch one-way test	N	N	N	N	N	N	N
Glucose-6-phosphate isomerase	W5P323	GPI	1.28772e+06	1.06343	Down	0.399122	0.600049	1.11612	Up	0.089901	0.559289	1.04955	Up	0.427037	0.706971	1.35213e+06	1.27148e+06	1.41912e+06	0.940356	-0.0887204	1.11612	0.158486	1.04955	0.0697653	Ovis aries	9940	Welch one-way test	N	Y	Y	Y	Y	Y	Y
Superoxide dismutase	W5P340	NA	1.0597e+06	1.15715	Up	0.254558	0.470818	1.0162	Down	0.841939	0.954278	1.1387	Up	0.284776	0.606157	1.07171e+06	1240125	1.22036e+06	1.15715	0.210571	0.984059	-0.023183	1.1387	0.187388	Ovis aries	9940	Welch one-way test	N	N	N	N	N	N	N
Stress induced phosphoprotein 1	W5P359	STIP1	721910	1.23647	Up	0.008218	0.0764594	1.03233	Down	0.602054	0.867498	1.19774	Up	0.029246	0.251907	737608	912027	883461	1.23647	0.306223	0.968679	-0.0459099	1.19774	0.260313	Ovis aries	9940	Welch one-way test	N	N	N	N	N	N	N
Vesicle amine transport 1	W5P363	VAT1	3.69179e+06	1.09234	Up	0.296806	0.507557	1.03247	Down	0.625916	0.867498	1.05799	Up	0.311962	0.628699	3.91511e+06	4.27664e+06	4.14214e+06	1.09234	0.127427	0.968551	-0.0461	1.05799	0.0813266	Ovis aries	9940	Welch one-way test	N	N	N	N	Y	Y	Y
T-complex protein 1 subunit alpha	W5P375	TCP1	367583	1.26124	Up	0.00152	0.0324541	1.05333	Down	0.283664	0.718209	1.19738	Up	0.010743	0.169739	375482	473574	449595	1.26124	0.334847	0.949366	-0.0749635	1.19738	0.259884	Ovis aries	9940	Welch one-way test	N	N	N	N	Y	Y	Y
Zinc binding alcohol dehydrogenase domain containing 2	W5P382	ZADH2	518309	1.15866	Down	0.118722	0.291611	1.10166	Up	0.058566	0.492204	1.05175	Down	0.57925	0.804809	556778	480534	529383	0.863062	-0.212463	1.10166	0.139674	0.950798	-0.072789	Ovis aries	9940	Welch one-way test	N	N	N	N	N	N	N
Peptidase M20 domain containing 1	W5P3H4	PM20D1	149888	1.99888	Up	0.03527	0.141438	1.85387	Down	0.019004	0.349143	1.07821	Up	0.65624	0.850468	174839	349481	188514	1.99888	0.999189	0.539411	-0.890544	1.07821	0.108645	Ovis aries	9940	Welch one-way test	N	N	N	N	N	N	N
Carnosine dipeptidase 2	W5P3I5	CNDP2	4.89332e+06	1.04774	Up	0.702638	0.826018	1.01612	Down	0.878288	0.967709	1.03112	Up	0.766712	0.903242	4.66713e+06	4.88992e+06	4.81236e+06	1.04774	0.0672744	0.984139	-0.0230656	1.03112	0.0442088	Ovis aries	9940	Welch one-way test	N	N	N	N	Y	Y	Y
Solute carrier family 22 member 2	W5P3M4	SLC22A2	1.27477e+06	1.08431	Up	0.393404	0.594595	1.06824	Up	0.384338	0.778531	1.15831	Up	0.008056	0.150467	1.2801e+06	1.38803e+06	1.48276e+06	1.08431	0.116783	1.06824	0.0952401	1.15831	0.212023	Ovis aries	9940	Welch one-way test	Y	N	N	N	N	N	N
Nipsnap homolog 1	W5P432	NIPSNAP1	144917	1.2762	Down	0.063351	0.192736	1.08881	Up	0.367066	0.765967	1.1721	Down	0.126062	0.429263	143020	112067	122020	0.783579	-0.351849	1.08881	0.122757	0.853171	-0.229092	Ovis aries	9940	Welch one-way test	N	N	N	N	N	N	N
Collagen type I alpha 1 chain	W5P481	COL1A1	685699	1.04727	Up	0.898644	0.934117	1.71316	Up	0.239488	0.700719	1.79415	Up	0.357674	0.665777	933534	977665	1674896	1.04727	0.0666375	1.71316	0.776659	1.79415	0.843297	Ovis aries	9940	Welch one-way test	N	N	N	N	N	N	N
Uncharacterized protein	W5P4A8	RNASET2	148337	2.02011	Up	0.000273	0.0155179	1.20442	Down	0.122218	0.588733	1.67724	Up	0.016613	0.215152	160638	324506	269428	2.02011	1.01443	0.830272	-0.268344	1.67724	0.746089	Ovis aries	9940	Welch one-way test	N	N	N	N	N	N	N
Ribosomal protein S13	W5P4C0	RPS13	653735	1.10676	Up	0.181158	0.383686	1.06485	Down	0.296825	0.720737	1.03936	Up	0.384559	0.679646	663403	734226	689513	1.10676	0.146338	0.939102	-0.0906461	1.03936	0.055692	Ovis aries	9940	Welch one-way test	N	N	N	N	N	N	N
Septin 7	W5P4C7	SEPTIN7	94920.2	1.14976	Up	0.019721	0.107516	1.08674	Down	0.281061	0.716252	1.058	Up	0.534835	0.781836	95864.2	110221	101424	1.14976	0.201338	0.920187	-0.120001	1.058	0.0813364	Ovis aries	9940	Welch one-way test	N	N	N	N	N	N	N
Cytochrome c oxidase subunit	W5P4E7	COX6B1	2.20935e+06	1.25203	Down	0.008887	0.0775589	1.05074	Down	0.342276	0.746956	1.31556	Down	0.009058	0.159018	2.22427e+06	1776535	1.69074e+06	0.798706	-0.324264	0.951706	-0.0714118	0.760133	-0.395676	Ovis aries	9940	Welch one-way test	N	N	N	N	N	N	N
Heterogeneous nuclear ribonucleoprotein H3	W5P4I5	HNRNPH3	150734	1.12726	Up	0.10184	0.261213	1.07657	Down	0.218868	0.688867	1.04708	Up	0.355071	0.663135	147322	166070	154258	1.12726	0.172817	0.928878	-0.106439	1.04708	0.0663781	Ovis aries	9940	Welch one-way test	N	N	N	N	N	N	N
Heterogeneous nuclear ribonucleoprotein U	W5P4I9	HNRNPU	629554	1.20981	Up	0.010481	0.0832316	1.12885	Down	0.032663	0.389784	1.07172	Up	0.200563	0.53578	661554	800352	709000	1.20981	0.274777	0.885861	-0.174849	1.07172	0.0999286	Ovis aries	9940	Welch one-way test	N	N	Y	N	N	Y	Y
Prohibitin	W5P4M1	PHB2	2.03392e+06	1.0378	Down	0.279048	0.490072	1.0204	Up	0.535006	0.8504	1.01705	Down	0.689835	0.865396	2048017	1.97342e+06	2.01369e+06	0.963578	-0.0535262	1.0204	0.0291395	0.983238	-0.0243867	Ovis aries	9940	Welch one-way test	N	N	N	N	N	N	N
Moesin	W5P4R1	MSN	821693	1.16403	Up	0.001842	0.0382942	1.01469	Down	0.805074	0.946015	1.14718	Up	0.087554	0.386348	835240	972244	958172	1.16403	0.219129	0.985526	-0.0210339	1.14718	0.198095	Ovis aries	9940	Welch one-way test	N	N	Y	N	Y	Y	Y
Ceruloplasmin	W5P4S5	CP	114743	2.54208	Up	0.003395	0.0502603	1.41489	Down	0.064009	0.50642	1.79666	Up	0.000855	0.073391	113389	288245	203722	2.54208	1.34601	0.706767	-0.500693	1.79666	0.845317	Ovis aries	9940	Welch one-way test	N	Y	N	N	N	N	Y
Proline dehydrogenase	W5P4U5	PRODH2	266196	1.31031	Up	0.150556	0.33577	1.22333	Down	0.165324	0.627913	1.0711	Up	0.624682	0.833613	287127	376225	307543	1.31031	0.38991	0.817443	-0.290811	1.0711	0.0990993	Ovis aries	9940	Welch one-way test	Y	N	N	N	N	N	N
Uncharacterized protein	W5P4X4	LOC101109899	665342	1.07069	Up	0.227311	0.444494	1.0821	Down	0.248745	0.700719	1.01065	Down	0.881795	0.950366	663940	710875	656941	1.07069	0.098543	0.92413	-0.113833	0.989458	-0.0152897	Ovis aries	9940	Welch one-way test	N	N	N	N	N	N	N
Proteasome subunit beta	W5P500	PSMB1	60948.5	1.05185	Up	0.473738	0.654288	1.04131	Down	0.549863	0.8504	1.01012	Up	0.872236	0.94652	60235.6	63358.6	60845	1.05185	0.0729241	0.960327	-0.0584017	1.01012	0.0145223	Ovis aries	9940	Welch one-way test	N	N	N	N	N	N	N
Uncharacterized protein	W5P542	LOC101107153	90596	1.12332	Down	0.44693	0.640789	1.23813	Up	0.090297	0.559289	1.10221	Up	0.436491	0.712454	95149.5	84704.1	104875	0.890221	-0.167764	1.23813	0.308167	1.10221	0.140403	Ovis aries	9940	Welch one-way test	N	N	N	N	N	N	N
Filamin A	W5P5A0	FLNA	832863	1.34637	Up	0.000261	0.0155179	1.15678	Down	0.134714	0.594548	1.16389	Up	0.25194	0.567146	851488	1.14641e+06	991036	1.34637	0.42907	0.864466	-0.210119	1.16389	0.218951	Ovis aries	9940	Welch one-way test	N	N	Y	Y	Y	Y	Y
4-aminobutyrate aminotransferase	W5P5B2	ABAT	301100	1.04794	Down	0.599361	0.749201	1.01841	Up	0.806428	0.946015	1.02899	Down	0.725092	0.877217	305373	291404	296769	0.954258	-0.0675494	1.01841	0.0263197	0.971826	-0.0412297	Ovis aries	9940	Welch one-way test	Y	N	N	N	N	N	N
Methylcrotonoyl-CoA carboxylase 2	W5P5E2	MCCC2	227242	1.22322	Down	0.084966	0.23226	1.13142	Up	0.084424	0.545922	1.08113	Down	0.508454	0.765928	262545	214635	242842	0.817516	-0.290682	1.13142	0.178136	0.924954	-0.112546	Ovis aries	9940	Welch one-way test	N	N	N	N	N	N	N
Calpain small subunit 1	W5P5G5	CAPNS1	355404	1.08748	Up	0.096931	0.25358	1.00992	Down	0.902161	0.967839	1.07679	Up	0.465375	0.732796	358781	390166	386332	1.08748	0.120987	0.990174	-0.0142465	1.07679	0.10674	Ovis aries	9940	Welch one-way test	N	N	N	N	N	N	N
Calmodulin	W5P5I7	CALM2	984466	1.10794	Up	0.219599	0.436132	1.02263	Up	0.801354	0.945292	1.133	Up	0.329652	0.636736	887938	983779	1.00604e+06	1.10794	0.147875	1.02263	0.0322776	1.133	0.180153	Ovis aries	9940	Welch one-way test	N	N	N	N	Y	Y	Y
6-phosphogluconate dehydrogenase, decarboxylating	W5P5M3	PGD	777033	1.00494	Up	0.841183	0.895599	1.09087	Up	0.007424	0.244373	1.09626	Up	0.032231	0.253241	801311	805270	878446	1.00494	0.0071112	1.09087	0.12548	1.09626	0.132591	Ovis aries	9940	Welch one-way test	N	N	Y	N	Y	Y	Y
Calcium regulated heat stable protein 1	W5P5P6	CARHSP1	919945	1.04921	Down	0.528654	0.699675	1.0214	Up	0.785467	0.942146	1.02722	Down	0.774967	0.905461	873672	832699	850518	0.953102	-0.0692977	1.0214	0.0305479	0.973498	-0.0387498	Ovis aries	9940	Welch one-way test	N	N	N	N	N	N	N
Uncharacterized protein	W5P5Q1	NA	407275	1.13738	Up	0.096637	0.25358	1.09469	Down	0.194435	0.670758	1.03899	Up	0.63561	0.838284	396037	450443	411479	1.13738	0.18571	0.913497	-0.130528	1.03899	0.0551825	Ovis aries	9940	Welch one-way test	N	N	N	N	N	N	N
NTR domain-containing protein	W5P5T4	NA	211488	1.16458	Up	0.255076	0.470818	1.19362	Down	0.158744	0.62083	1.02493	Down	0.800977	0.912731	215216	250636	209980	1.16458	0.219807	0.83779	-0.255339	0.975672	-0.0355321	Ovis aries	9940	Welch one-way test	N	N	N	N	N	N	N
40S ribosomal protein S7	W5P5T8	RPS7	314947	1.18648	Up	0.020267	0.109664	1.08153	Down	0.175598	0.645221	1.09704	Up	0.037543	0.269627	309470	367181	339502	1.18648	0.246693	0.924618	-0.11307	1.09704	0.133622	Ovis aries	9940	Welch one-way test	N	N	N	N	N	N	N
NADH:ubiquinone oxidoreductase subunit B7	W5P5V3	NDUFB7	128832	1.04665	Down	0.56891	0.723734	1.04698	Up	0.569822	0.855816	1.00031	Up	0.996866	0.998129	130599	124778	130640	0.955425	-0.0657847	1.04698	0.0662354	1.00031	0.000450636	Ovis aries	9940	Welch one-way test	N	N	N	N	N	N	N
N-myc downstream regulated 1	W5P5W6	NDRG1	3.35446e+06	1.06027	Up	0.633486	0.772305	1.16833	Down	0.084998	0.545922	1.10192	Down	0.376894	0.674824	3002580	3.18356e+06	2.72487e+06	1.06027	0.0844364	0.85592	-0.224452	0.907509	-0.140016	Ovis aries	9940	Welch one-way test	N	N	N	N	N	N	N
Triosephosphate isomerase	W5P5W9	TPI1	4.71688e+06	1.14283	Down	0.001258	0.0310569	1.04577	Up	0.23146	0.694461	1.09281	Down	0.030335	0.252259	4.77613e+06	4.17921e+06	4.3705e+06	0.875019	-0.192614	1.04577	0.0645691	0.91507	-0.128045	Ovis aries	9940	Welch one-way test	N	N	Y	Y	Y	Y	Y
Stomatin	W5P601	STOM	143275	1.10188	Up	0.194193	0.401865	1.05861	Up	0.447263	0.83644	1.16646	Up	0.152901	0.471843	151466	166898	176680	1.10188	0.13997	1.05861	0.0821714	1.16646	0.222142	Ovis aries	9940	Welch one-way test	N	N	Y	N	Y	Y	Y
Chloride intracellular channel protein	W5P610	CLIC1	340491	1.42441	Up	0.013529	0.0907754	1.11709	Down	0.326353	0.740399	1.27511	Up	0.048859	0.30563	335674	478135	428020	1.42441	0.51036	0.895187	-0.159739	1.27511	0.35062	Ovis aries	9940	Welch one-way test	N	N	N	N	N	N	N
Lamin A/C	W5P640	LMNA	624874	1.0179	Down	0.728371	0.836237	1.01999	Up	0.814281	0.946015	1.00205	Up	0.984131	0.992355	612119	601352	613374	0.98241	-0.0256027	1.01999	0.0285578	1.00205	0.0029551	Ovis aries	9940	Welch one-way test	N	N	Y	Y	Y	Y	Y
Cytochrome b-c1 complex subunit 7	W5P642	UQCRB	823929	1.11846	Down	0.033447	0.135673	1.10674	Up	0.208779	0.681177	1.01059	Down	0.904386	0.955167	808063	722477	799595	0.894085	-0.161515	1.10674	0.146317	0.989521	-0.0151983	Ovis aries	9940	Welch one-way test	N	N	N	N	N	N	N
RAB14, member RAS oncogene family	W5P645	RAB14	317619	1.1647	Up	0.010539	0.0832316	1.08026	Down	0.125691	0.590469	1.07816	Up	0.206783	0.5423	316069	368124	340772	1.1647	0.219954	0.925699	-0.111385	1.07816	0.108569	Ovis aries	9940	Welch one-way test	N	N	N	N	Y	Y	Y
Pipecolic acid and sarcosine oxidase	W5P674	PIPOX	584453	1.0659	Up	0.658377	0.789253	1.03191	Down	0.798042	0.945292	1.03294	Up	0.720785	0.877217	573677	611481	592574	1.0659	0.092069	0.96908	-0.0453121	1.03294	0.0467569	Ovis aries	9940	Welch one-way test	Y	N	N	N	N	N	N
Uncharacterized protein	W5P694	RPLP2	799973	1.14915	Up	0.02279	0.114535	1.00473	Up	0.921281	0.969632	1.15459	Up	0.007443	0.150467	789322	907053	911345	1.14915	0.200573	1.00473	0.00680998	1.15459	0.207383	Ovis aries	9940	Welch one-way test	N	N	N	N	N	N	N
Ubiquinol-cytochrome c reductase, complex III subunit X	W5P6B2	UQCR10	494319	1.1255	Down	0.285158	0.494024	1.03678	Down	0.561609	0.85424	1.16689	Down	0.211296	0.5423	571371	507659	489652	0.888493	-0.170568	0.964528	-0.052105	0.856976	-0.222673	Ovis aries	9940	Welch one-way test	N	N	N	N	N	N	N
Phytanoyl-CoA 2-hydroxylase	W5P6D9	PHYH	838026	1.00766	Up	0.935839	0.952723	1.11235	Down	0.409535	0.80175	1.10389	Down	0.456573	0.727203	816969	823229	740078	1.00766	0.011013	0.898995	-0.153616	0.905883	-0.142603	Ovis aries	9940	Welch one-way test	N	N	N	N	N	N	N
Proteasome 26S subunit, non-ATPase 5	W5P6M2	PSMD5	223916	1.04001	Up	0.613808	0.754972	1.0822	Up	0.148413	0.610658	1.1255	Up	0.060754	0.345733	230706	239937	259660	1.04001	0.0566039	1.0822	0.113965	1.1255	0.170569	Ovis aries	9940	Welch one-way test	N	N	Y	Y	N	Y	Y
Uncharacterized protein	W5P6P4	LOC101110647	528076	1.23747	Up	0.01289	0.0885072	1.0894	Down	0.230817	0.694461	1.13591	Up	0.092015	0.386348	536878	664369	609846	1.23747	0.307391	0.917933	-0.12354	1.13591	0.183851	Ovis aries	9940	Welch one-way test	N	N	N	N	N	N	N
Profilin	W5P6Q5	PFN1	959006	1.28699	Up	0.024164	0.115568	1.06372	Down	0.414332	0.80175	1.2099	Up	6.7e-05	0.0158	977017	1257411	1.18209e+06	1.28699	0.364001	0.940099	-0.0891157	1.2099	0.274885	Ovis aries	9940	Welch one-way test	N	N	N	N	N	N	N
Nicotinate-nucleotide pyrophosphorylase [carboxylating]	W5P6S5	QPRT	531967	1.01465	Up	0.868762	0.913877	1.06801	Up	0.65462	0.879506	1.08365	Up	0.672877	0.855995	531298	539080	575741	1.01465	0.0209795	1.06801	0.0949205	1.08365	0.1159	Ovis aries	9940	Welch one-way test	N	N	Y	N	Y	Y	Y
Actinin alpha 4	W5P707	ACTN4	1.14203e+06	1.15073	Up	0.015503	0.0949409	1.15862	Down	0.008105	0.246267	1.00686	Down	0.873961	0.947091	1.17344e+06	1.35031e+06	1.16545e+06	1.15073	0.202551	0.863095	-0.212408	0.993191	-0.00985687	Ovis aries	9940	Welch one-way test	N	N	Y	Y	Y	Y	Y
T-complex protein 1 subunit gamma	W5P765	CCT3	707980	1.28642	Up	0.002973	0.0489306	1.09408	Down	0.092055	0.559411	1.1758	Up	0.002841	0.0897756	728400	937025	856450	1.28642	0.363357	0.914009	-0.129719	1.1758	0.233638	Ovis aries	9940	Welch one-way test	N	N	Y	Y	N	Y	Y
Enoyl-CoA hydratase 1	W5P772	ECH1	1.01573e+06	1.11449	Up	0.310403	0.520273	1.01085	Up	0.902738	0.967839	1.12658	Up	0.306848	0.624206	996887	1.11102e+06	1.12308e+06	1.11449	0.156385	1.01085	0.0155679	1.12658	0.171953	Ovis aries	9940	Welch one-way test	N	N	N	N	N	N	N
KH-type splicing regulatory protein	W5P7A2	KHSRP	171780	1.07924	Up	0.054402	0.184628	1.07387	Down	0.200254	0.67146	1.005	Up	0.947747	0.98051	166735	179948	167569	1.07924	0.110016	0.931212	-0.102819	1.005	0.00719743	Ovis aries	9940	Welch one-way test	N	N	N	N	N	N	N
RNA helicase	W5P7B0	DDX31	405287	1.11203	Up	0.168014	0.362653	1.00265	Down	0.971541	0.98526	1.10909	Up	0.168004	0.49709	402510	447605	446422	1.11203	0.1532	0.997356	-0.003819	1.10909	0.149381	Ovis aries	9940	Welch one-way test	N	N	Y	Y	N	Y	Y
Sterol carrier protein 2	W5P7N5	SCP2	3.03796e+06	1.10533	Up	0.510408	0.688246	1.04591	Down	0.712508	0.90044	1.05681	Up	0.575127	0.804809	3.04891e+06	3.37005e+06	3.22213e+06	1.10533	0.144474	0.956108	-0.0647543	1.05681	0.0797202	Ovis aries	9940	Welch one-way test	N	N	N	N	N	N	N
Prohibitin	W5P7Q3	PHB	2.43301e+06	1.01238	Down	0.722025	0.834115	1.02449	Up	0.552222	0.8504	1.01196	Up	0.756569	0.901492	2436585	2.4068e+06	2.46574e+06	0.987774	-0.0177472	1.02449	0.0349053	1.01196	0.0171581	Ovis aries	9940	Welch one-way test	N	N	Y	N	N	Y	Y
Alpha-1-acid glycoprotein	W5P7S6	LOC101103947	47089.8	11.8758	Up	0.003759	0.0503324	2.11696	Down	0.047557	0.442	5.60982	Up	0.032697	0.253241	44599.2	529650	250193	11.8758	3.56995	0.472375	-1.082	5.60982	2.48795	Ovis aries	9940	Welch one-way test	N	N	N	N	N	N	N
Transaldolase	W5P7X3	TALDO1	47414.4	1.31347	Up	0.055001	0.184628	1.09731	Down	0.144956	0.602712	1.19699	Up	0.28478	0.606157	45087.2	59220.7	53969.1	1.31347	0.393384	0.911322	-0.133968	1.19699	0.259416	Ovis aries	9940	Welch one-way test	N	N	N	N	N	N	N
Uncharacterized protein	W5P7Z1	NA	601791	1.21161	Up	0.028398	0.126748	1.091	Down	0.221115	0.690438	1.11055	Up	0.119408	0.421136	622688	754454	691526	1.21161	0.276924	0.916591	-0.12565	1.11055	0.151274	Ovis aries	9940	Welch one-way test	N	N	N	N	N	N	N
Alpha-1-microglobulin/bikunin precursor	W5P812	AMBP	897915	1.3105	Up	0.261869	0.475513	1.33289	Up	0.150865	0.61146	1.74676	Up	0.019486	0.227799	930443	1.21935e+06	1.62526e+06	1.3105	0.390121	1.33289	0.41456	1.74676	0.804681	Ovis aries	9940	Welch one-way test	N	Y	Y	Y	Y	Y	Y
Actin-related protein 2/3 complex subunit 4	W5P824	ARPC4	176831	1.28865	Up	0.010913	0.0834315	1.09308	Down	0.170286	0.631764	1.17892	Up	0.024742	0.246322	162086	208873	191086	1.28865	0.365863	0.914845	-0.128402	1.17892	0.237462	Ovis aries	9940	Welch one-way test	N	N	N	N	N	N	N
Carnitine palmitoyltransferase 2	W5P878	CPT2	419841	1.02002	Down	0.784843	0.867169	1.06191	Up	0.272605	0.709176	1.04106	Up	0.54067	0.783327	429601	421167	447240	0.980369	-0.0286029	1.06191	0.0866568	1.04106	0.0580539	Ovis aries	9940	Welch one-way test	N	N	Y	Y	N	Y	Y
Septin 9	W5P889	SEPTIN9	91496.3	1.29104	Up	0.01149	0.0840472	1.05093	Down	0.548938	0.8504	1.22847	Up	0.057666	0.339971	93091.6	120185	114361	1.29104	0.368536	0.951536	-0.0716692	1.22847	0.296867	Ovis aries	9940	Welch one-way test	N	N	N	N	N	N	N
Delta-aminolevulinic acid dehydratase	W5P8G0	ALAD	429319	1.15247	Down	0.09389	0.248903	1.01144	Down	0.821041	0.946015	1.16565	Down	0.069934	0.351315	453158	393205	388759	0.867699	-0.204733	0.988691	-0.0164082	0.857887	-0.221141	Ovis aries	9940	Welch one-way test	N	N	Y	N	Y	Y	Y
Uncharacterized protein	W5P8I3	RIDA	1.07417e+07	1.03184	Down	0.731848	0.836237	1.0124	Down	0.872834	0.967128	1.04463	Down	0.712347	0.877217	1.02633e+07	9.94659e+06	9.82479e+06	0.969142	-0.0452195	0.987755	-0.017775	0.957275	-0.0629945	Ovis aries	9940	Welch one-way test	Y	N	N	N	Y	Y	Y
Uncharacterized protein	W5P8R0	NDUFA4	3.30611e+06	1.20706	Down	0.108165	0.27476	1.15012	Down	0.178223	0.651834	1.38827	Down	0.044697	0.296976	3.5173e+06	2.91394e+06	2.53359e+06	0.828459	-0.271499	0.869473	-0.201787	0.720322	-0.473286	Ovis aries	9940	Welch one-way test	N	N	N	N	N	N	N
Heparin binding growth factor	W5P8R3	HDGF	425679	1.05018	Up	0.541386	0.704605	1.00946	Up	0.895275	0.967839	1.06011	Up	0.467193	0.732796	440976	463105	467484	1.05018	0.0706379	1.00946	0.0135795	1.06011	0.0842174	Ovis aries	9940	Welch one-way test	N	N	N	N	N	N	N
Aldehyde dehydrogenase 1 family member L1	W5P8S8	ALDH1L1	3.20798e+06	1.1209	Down	0.31648	0.520873	1.12148	Up	0.14289	0.601047	1.00051	Up	0.994879	0.998129	3.20884e+06	2.86272e+06	3.21047e+06	0.892137	-0.164664	1.12148	0.165398	1.00051	0.00073482	Ovis aries	9940	Welch one-way test	Y	N	N	N	Y	Y	Y
Collagen type XII alpha 1 chain	W5P8W6	COL12A1	1.02433e+06	1.57909	Up	0.003533	0.0502603	1.09283	Up	0.515557	0.846103	1.72568	Up	0.022524	0.244671	1.10609e+06	1.74663e+06	1.90876e+06	1.57909	0.659097	1.09283	0.128064	1.72568	0.787162	Ovis aries	9940	Welch one-way test	N	N	N	N	Y	Y	Y
Chloride intracellular channel protein	W5P8X9	CLIC4	1.40901e+06	1.00958	Down	0.886284	0.92492	1.02706	Down	0.58676	0.863535	1.03689	Down	0.526059	0.775348	1.45851e+06	1.44468e+06	1.40662e+06	0.990513	-0.0137516	0.973656	-0.0385154	0.96442	-0.052267	Ovis aries	9940	Welch one-way test	N	N	N	N	N	N	N
Dipeptidyl peptidase 4	W5P906	DPP4	506407	1.38545	Up	0.037956	0.148442	1.26069	Down	0.080917	0.537161	1.09896	Up	0.375402	0.674824	508899	705055	559262	1.38545	0.470356	0.793217	-0.334212	1.09896	0.136144	Ovis aries	9940	Welch one-way test	N	N	Y	Y	Y	Y	Y
Signal sequence receptor subunit 4	W5P940	SSR4	119565	1.28786	Up	0.043415	0.163047	1.0391	Up	0.625849	0.867498	1.33822	Up	0.00664	0.141773	136618	175945	182825	1.28786	0.364978	1.0391	0.0553388	1.33822	0.420317	Ovis aries	9940	Welch one-way test	N	N	N	N	Y	Y	Y
Hydroxysteroid dehydrogenase like 2	W5P973	HSDL2	449737	1.05939	Down	0.491136	0.666662	1.04676	Up	0.618939	0.867498	1.01207	Down	0.880919	0.950366	448957	423786	443604	0.943936	-0.0832397	1.04676	0.0659368	0.988078	-0.017303	Ovis aries	9940	Welch one-way test	N	N	N	N	N	N	N
Collagen type IV alpha 2 chain	W5P983	COL4A2	1.07127e+06	1.15185	Up	0.426618	0.625284	1.53046	Up	0.225004	0.691647	1.76285	Up	0.237158	0.562971	1.26812e+06	1.46068e+06	2.23551e+06	1.15185	0.203951	1.53046	0.613962	1.76285	0.817913	Ovis aries	9940	Welch one-way test	N	N	N	N	N	N	N
Abhydrolase domain containing 14B	W5P985	ABHD14B	1.42414e+06	1.13777	Down	0.074587	0.211196	1.0189	Down	0.807469	0.946015	1.15927	Down	0.049906	0.307784	1.42398e+06	1.25155e+06	1.22834e+06	0.878915	-0.186205	0.981451	-0.0270117	0.862612	-0.213216	Ovis aries	9940	Welch one-way test	N	N	N	N	Y	Y	Y
Lon protease homolog, mitochondrial	W5P994	LONP1	425214	1.05727	Up	0.067396	0.200161	1.03308	Up	0.41367	0.80175	1.09225	Up	0.105822	0.404636	420264	444335	459034	1.05727	0.0803499	1.03308	0.0469539	1.09225	0.127304	Ovis aries	9940	Welch one-way test	N	N	N	N	N	N	N
PPR_long domain-containing protein	W5P995	NA	60226.3	1.00968	Down	0.904982	0.937006	1.01548	Down	0.823121	0.946015	1.02531	Down	0.765478	0.903242	60962.2	60377.8	59457.5	0.990414	-0.0138968	0.984758	-0.0221594	0.975317	-0.0360562	Ovis aries	9940	Welch one-way test	N	N	N	N	N	N	N
Succinate-semialdehyde dehydrogenase	W5P9A0	ALDH5A1	22951.5	1.19657	Down	0.46016	0.647997	1.12809	Up	0.491223	0.846103	1.06071	Down	0.788856	0.911106	25137	21007.5	23698.3	0.83572	-0.258908	1.12809	0.173879	0.942766	-0.0850289	Ovis aries	9940	Welch one-way test	N	N	N	N	N	N	N
Acetyl-coenzyme A synthetase	W5P9I9	ACSS1	478899	1.40954	Down	0.02237	0.114094	1.1684	Up	0.052766	0.47914	1.20638	Down	0.171299	0.502616	500952	355401	415250	0.709451	-0.495224	1.1684	0.224535	0.828924	-0.270689	Ovis aries	9940	Welch one-way test	N	N	N	N	N	N	N
Proteasome 26S subunit, ATPase 3	W5P9K6	PSMC3	130938	1.12245	Up	0.140195	0.319176	1.01222	Down	0.825069	0.946015	1.10889	Up	0.131922	0.436377	132942	149221	147419	1.12245	0.166648	0.987925	-0.0175271	1.10889	0.149121	Ovis aries	9940	Welch one-way test	N	N	N	N	N	N	N
MISP family member 3	W5P9M1	MISP3	446793	1.1243	Down	0.344596	0.546132	1.06296	Up	0.592187	0.866075	1.05771	Down	0.558767	0.799685	419201	372855	396330	0.889443	-0.169026	1.06296	0.0880874	0.945442	-0.0809389	Ovis aries	9940	Welch one-way test	N	N	N	N	N	N	N
Prostaglandin reductase 1	W5P9M2	PTGR1	1.98596e+06	1.09299	Down	0.552889	0.713697	1.01275	Down	0.925949	0.970159	1.10693	Down	0.382917	0.678261	1.99145e+06	1.82202e+06	1.79908e+06	0.914921	-0.128281	0.987409	-0.0182802	0.903401	-0.146562	Ovis aries	9940	Welch one-way test	N	N	Y	Y	Y	Y	Y
Tubulointerstitial nephritis antigen	W5P9S4	TINAG	2.99453e+06	1.27182	Down	0.053428	0.183984	1.03687	Up	0.7641	0.925613	1.22659	Down	0.066286	0.346873	2.85184e+06	2.24233e+06	2.32501e+06	0.786276	-0.346893	1.03687	0.0522352	0.815266	-0.294658	Ovis aries	9940	Welch one-way test	Y	N	N	N	Y	Y	Y
MICOS complex subunit	W5P9X2	CHCHD3	424014	1.07765	Down	0.374788	0.578702	1.08525	Up	0.331791	0.740399	1.00705	Up	0.942871	0.978802	440437	408700	443540	0.927942	-0.107894	1.08525	0.118023	1.00705	0.0101285	Ovis aries	9940	Welch one-way test	N	N	N	N	N	N	N
Prosaposin	W5PAJ2	PSAP	1.06297e+07	1.38263	Up	0.045674	0.167825	1.31562	Down	0.066804	0.50642	1.05093	Up	0.804128	0.912731	1.11289e+07	1.53871e+07	1.16957e+07	1.38263	0.467413	0.760099	-0.39574	1.05093	0.0716725	Ovis aries	9940	Welch one-way test	N	N	Y	Y	Y	Y	Y
Peroxiredoxin	W5PAL7	PRDX5	2.61251e+06	1.12296	Down	0.002246	0.0437776	1.14374	Up	0.007927	0.246267	1.01851	Up	0.723186	0.877217	2.62453e+06	2.33716e+06	2.67312e+06	0.890507	-0.167301	1.14374	0.193765	1.01851	0.0264635	Ovis aries	9940	Welch one-way test	N	N	Y	N	Y	Y	Y
Retinol binding protein 1	W5PAM5	RBP1	156617	1.13633	Down	0.090697	0.242883	1.17116	Up	0.107151	0.568621	1.03065	Up	0.76742	0.903242	156632	137840	161433	0.880023	-0.184387	1.17116	0.227935	1.03065	0.0435484	Ovis aries	9940	Welch one-way test	N	N	N	N	N	N	N
High mobility group nucleosomal binding domain 3	W5PAN6	HMGN3	275162	1.0251	Up	0.820968	0.884809	1.03726	Down	0.726096	0.900496	1.01186	Down	0.91933	0.965786	301022	308579	297495	1.0251	0.03577	0.96408	-0.052775	0.988282	-0.017005	Ovis aries	9940	Welch one-way test	N	N	N	N	N	N	N
3-hydroxy-3-methylglutaryl-CoA lyase	W5PAS5	HMGCL	143613	1.10572	Up	0.131084	0.308394	1.02224	Up	0.640943	0.872258	1.13031	Up	0.145162	0.455908	133478	147590	150872	1.10572	0.144986	1.02224	0.031735	1.13031	0.176721	Ovis aries	9940	Welch one-way test	N	N	Y	Y	N	Y	Y
Uncharacterized protein	W5PAT6	NA	119363	1.1887	Down	0.139882	0.319176	1.09837	Down	0.336536	0.740399	1.30564	Down	0.069502	0.351315	130856	110083	100224	0.841253	-0.249389	0.91044	-0.135364	0.76591	-0.384753	Ovis aries	9940	Welch one-way test	N	N	N	N	N	N	N
Glutamate-cysteine ligase catalytic subunit	W5PAX1	GCLC	277494	1.13486	Down	0.127658	0.306046	1.09986	Up	0.353642	0.75712	1.03182	Down	0.764317	0.903242	276284	243452	267763	0.881166	-0.182515	1.09986	0.137319	0.969158	-0.0451959	Ovis aries	9940	Welch one-way test	N	N	Y	N	N	Y	Y
NADH:ubiquinone oxidoreductase core subunit S3	W5PB27	NDUFS3	1.32767e+06	1.03646	Up	0.538791	0.703545	1.03181	Down	0.520431	0.846103	1.00451	Up	0.939813	0.976911	1.41761e+06	1.46929e+06	1.424e+06	1.03646	0.0516658	0.969174	-0.0451728	1.00451	0.00649304	Ovis aries	9940	Welch one-way test	N	N	N	N	N	N	N
Dihydrolipoyl dehydrogenase	W5PB39	DLD	1.26634e+06	1.03957	Down	0.718123	0.834115	1.07488	Up	0.505813	0.846103	1.03397	Up	0.806529	0.913281	1.2896e+06	1.24051e+06	1.33341e+06	0.961935	-0.0559881	1.07488	0.10418	1.03397	0.0481921	Ovis aries	9940	Welch one-way test	N	N	N	N	N	N	N
Serine hydroxymethyltransferase	W5PB83	SHMT2	267103	1.0087	Up	0.881557	0.922424	1.09381	Up	0.330979	0.740399	1.10333	Up	0.359169	0.666065	268592	270930	296345	1.0087	0.0125028	1.09381	0.129358	1.10333	0.141861	Ovis aries	9940	Welch one-way test	N	N	N	N	N	N	N
B-cell receptor-associated protein	W5PB89	BCAP31	423580	1.059	Up	0.510166	0.688246	1.06238	Down	0.391287	0.786557	1.00319	Down	0.96169	0.988563	407332	431366	406038	1.059	0.0827062	0.941284	-0.0872977	0.996822	-0.00459147	Ovis aries	9940	Welch one-way test	N	N	Y	N	N	Y	Y
CD74 molecule	W5PBE0	CD74	136231	1.58847	Up	0.050066	0.178163	1.06473	Up	0.697804	0.899183	1.6913	Up	0.005367	0.131074	129515	205731	219049	1.58847	0.667638	1.06473	0.0904918	1.6913	0.75813	Ovis aries	9940	Welch one-way test	N	N	N	N	N	N	N
Serine dehydratase like	W5PBH0	SDSL	1.47826e+06	1.2442	Up	0.055968	0.184999	1.04209	Up	0.650892	0.877545	1.29658	Up	0.013687	0.189697	1.40214e+06	1.74455e+06	1.81798e+06	1.2442	0.315223	1.04209	0.0594861	1.29658	0.374709	Ovis aries	9940	Welch one-way test	N	N	N	N	N	N	N
3-hydroxyanthranilate 3,4-dioxygenase	W5PBI0	HAAO	287376	1.35931	Down	0.059275	0.188649	1.27096	Up	0.054963	0.487874	1.06951	Down	0.713968	0.877217	379484	279174	354821	0.735669	-0.442871	1.27096	0.345924	0.935009	-0.0969473	Ovis aries	9940	Welch one-way test	N	N	N	N	N	N	N
Uncharacterized protein	W5PBP1	RPS14	384026	1.14138	Up	0.091628	0.243724	1.0339	Down	0.623337	0.867498	1.10395	Up	0.125658	0.429263	375040	428062	414026	1.14138	0.190774	0.967211	-0.0480971	1.10395	0.142677	Ovis aries	9940	Welch one-way test	N	N	N	N	N	N	N
Mitochondrial carrier 2	W5PBQ7	MTCH2	1.5041e+06	1.00095	Up	0.984843	0.984843	1.03178	Up	0.459725	0.843412	1.03275	Up	0.41453	0.705402	1.49997e+06	1.50139e+06	1.5491e+06	1.00095	0.00136407	1.03178	0.0451294	1.03275	0.0464935	Ovis aries	9940	Welch one-way test	N	N	N	N	N	N	N
2-oxoisovalerate dehydrogenase subunit alpha	W5PBX9	BCKDHA	243644	1.16527	Down	0.058357	0.188649	1.03131	Up	0.667474	0.890049	1.1299	Down	0.117083	0.420316	237662	203954	210340	0.858168	-0.220668	1.03131	0.044478	0.885037	-0.17619	Ovis aries	9940	Welch one-way test	N	N	N	N	N	N	N
Uncharacterized protein	W5PBY5	NA	810982	1.03057	Down	0.688328	0.816485	1.00347	Up	0.959748	0.980855	1.027	Down	0.72458	0.877217	785121	761835	764482	0.970341	-0.0434355	1.00347	0.00500359	0.973713	-0.0384319	Ovis aries	9940	Welch one-way test	N	N	N	N	N	N	N
Aldo_ket_red domain-containing protein	W5PC00	AKR1B1	290575	1.00826	Down	0.934736	0.952723	1.06326	Down	0.58015	0.861501	1.07203	Down	0.635375	0.838284	335634	332886	313082	0.991812	-0.0118611	0.940508	-0.0884881	0.932807	-0.100349	Ovis aries	9940	Welch one-way test	N	N	N	N	Y	Y	Y
Proteasome subunit alpha type	W5PC09	PSMA6	276855	1.19974	Up	0.004873	0.0583283	1.1307	Down	0.01529	0.326462	1.06106	Up	0.182198	0.521832	281558	337796	298750	1.19974	0.26272	0.884409	-0.177214	1.06106	0.0855065	Ovis aries	9940	Welch one-way test	N	N	N	N	Y	Y	Y
Uncharacterized protein	W5PC25	LOC101116273	1.94773e+06	1.11746	Down	0.193445	0.401865	1.14809	Up	0.095268	0.563589	1.02741	Up	0.628424	0.83468	1.98726e+06	1.77837e+06	2.04173e+06	0.894883	-0.160228	1.14809	0.199237	1.02741	0.0390084	Ovis aries	9940	Welch one-way test	N	N	N	N	N	N	N
Fructose-bisphosphate aldolase	W5PCA0	ALDOB	1.39092e+07	1.05652	Down	0.429354	0.628129	1.04898	Down	0.465833	0.843412	1.10826	Down	0.094264	0.38764	1.41603e+07	1.34028e+07	1.2777e+07	0.946508	-0.0793134	0.95331	-0.068983	0.902315	-0.148296	Ovis aries	9940	Welch one-way test	Y	N	Y	Y	Y	Y	Y
Acyl-CoA synthetase long chain family member 1	W5PCL4	ACSL1	942048	1.07488	Up	0.603872	0.751192	1.13813	Down	0.319504	0.740399	1.05884	Down	0.462895	0.732796	940948	1.01141e+06	888657	1.07488	0.104182	0.878632	-0.18667	0.944428	-0.0824879	Ovis aries	9940	Welch one-way test	N	N	N	N	N	N	N
Annexin	W5PCN2	ANXA7	121093	1.12257	Down	0.177118	0.376138	1.09043	Up	0.236612	0.700719	1.02948	Down	0.711416	0.877217	115806	103161	112490	0.890813	-0.166806	1.09043	0.124896	0.971368	-0.0419095	Ovis aries	9940	Welch one-way test	N	N	N	N	N	N	N
Uridine phosphorylase	W5PCQ3	UPP2	711311	1.97668	Down	0.00119	0.0303258	2.02722	Up	0.001289	0.128375	1.02557	Up	0.838833	0.928121	719050	363766	737434	0.505898	-0.983083	2.02722	1.01951	1.02557	0.0364228	Ovis aries	9940	Welch one-way test	Y	N	N	N	Y	Y	Y
Uncharacterized protein	W5PCQ8	SLC25A4	1.39498e+06	1.13326	Down	0.272329	0.485643	1.0514	Up	0.507556	0.846103	1.07786	Down	0.50061	0.762592	1.31592e+06	1.16118e+06	1.22086e+06	0.882409	-0.18048	1.0514	0.0723091	0.927763	-0.108171	Ovis aries	9940	Welch one-way test	N	N	N	N	N	N	N
Uncharacterized protein	W5PCR3	NA	392819	1.1756	Up	0.008934	0.0775589	1.03403	Down	0.547475	0.8504	1.13691	Up	0.062954	0.345733	398168	468088	452683	1.1756	0.233402	0.967089	-0.0482793	1.13691	0.185123	Ovis aries	9940	Welch one-way test	N	N	N	N	N	N	N
Argininosuccinate synthase 1	W5PCU1	ASS1	7.85598e+06	1.23427	Up	0.02875	0.126885	1.12697	Down	0.139669	0.599666	1.09521	Up	0.228684	0.554173	7.91976e+06	9.77509e+06	8.67376e+06	1.23427	0.303654	0.887333	-0.172453	1.09521	0.131201	Ovis aries	9940	Welch one-way test	Y	N	N	N	Y	Y	Y
Uncharacterized protein	W5PD03	NA	608043	1.0251	Up	0.61442	0.754972	1.01385	Up	0.790399	0.943225	1.03929	Up	0.513992	0.769041	605335	620529	629121	1.0251	0.0357653	1.01385	0.0198377	1.03929	0.055603	Ovis aries	9940	Welch one-way test	N	N	N	N	N	N	N
Aquaporin-1	W5PD28	AQP1	595688	1.50873	Down	0.052798	0.18294	1.11943	Down	0.29247	0.720105	1.68891	Down	0.028987	0.251907	753670	499540	446246	0.662811	-0.593331	0.893313	-0.162763	0.592097	-0.756094	Ovis aries	9940	Welch one-way test	Y	N	Y	N	Y	Y	Y
Caldesmon 1	W5PD77	CALD1	657891	1.20395	Up	0.027379	0.125025	1.14401	Down	0.091327	0.559289	1.0524	Up	0.575929	0.804809	628922	757193	661878	1.20395	0.26778	0.87412	-0.194096	1.0524	0.0736836	Ovis aries	9940	Welch one-way test	N	N	Y	N	N	Y	Y
AU RNA binding methylglutaconyl-CoA hydratase	W5PD90	AUH	672435	1.08318	Down	0.354481	0.554535	1.06687	Up	0.423583	0.81221	1.01529	Down	0.869301	0.944632	697212	643672	686716	0.923208	-0.115272	1.06687	0.0933868	0.984945	-0.0218851	Ovis aries	9940	Welch one-way test	N	N	N	N	N	N	N
Lymphocyte cytosolic protein 1	W5PDD0	LCP1	42659.6	1.4522	Up	0.088693	0.239138	1.02745	Down	0.856117	0.960699	1.4134	Up	0.0022	0.087058	42305.4	61435.8	59794.6	1.4522	0.538238	0.973286	-0.0390644	1.4134	0.499173	Ovis aries	9940	Welch one-way test	N	N	N	N	N	N	N
Secernin 2	W5PDD6	SCRN2	262946	1.02359	Down	0.759796	0.852612	1.1542	Up	0.289831	0.718209	1.1276	Up	0.467505	0.732796	246585	240902	278050	0.976954	-0.033638	1.1542	0.206895	1.1276	0.173257	Ovis aries	9940	Welch one-way test	N	N	Y	Y	Y	Y	Y
Glutathione peroxidase	W5PDJ6	GPX3	1.76381e+07	1.13744	Down	0.230175	0.447649	1.02538	Up	0.815783	0.946015	1.10928	Down	0.389723	0.682663	16342550	1.43679e+07	1.47325e+07	0.879171	-0.185784	1.02538	0.0361553	0.901482	-0.149629	Ovis aries	9940	Welch one-way test	Y	Y	Y	Y	Y	Y	Y
Propionyl-CoA carboxylase subunit beta	W5PDK7	PCCB	877047	1.11504	Up	0.156088	0.343481	1.06564	Up	0.41053	0.80175	1.18824	Up	0.067322	0.34761	886207	988158	1.05303e+06	1.11504	0.157098	1.06564	0.091726	1.18824	0.248824	Ovis aries	9940	Welch one-way test	N	N	N	N	N	N	N
WD repeat domain 1	W5PDL1	WDR1	909726	1.10829	Up	0.03306	0.135673	1.04346	Down	0.293511	0.720105	1.06213	Up	0.21726	0.54661	902106	999798	958158	1.10829	0.14834	0.958351	-0.0613737	1.06213	0.0869665	Ovis aries	9940	Welch one-way test	N	N	N	N	N	N	N
Uncharacterized protein	W5PDV0	SORBS2	139282	1.47861	Up	0.00891	0.0775589	1.13753	Down	0.257401	0.700719	1.29984	Up	0.019464	0.227799	138881	205351	180523	1.47861	0.564244	0.879095	-0.185909	1.29984	0.378335	Ovis aries	9940	Welch one-way test	N	N	N	N	N	N	N
Transgelin	W5PE01	TAGLN2	1.37772e+06	1.04138	Down	0.482803	0.664485	1.06228	Up	0.491195	0.846103	1.02007	Up	0.8526	0.935492	1.46449e+06	1.4063e+06	1.49388e+06	0.960269	-0.05849	1.06228	0.0871595	1.02007	0.0286695	Ovis aries	9940	Welch one-way test	N	N	Y	Y	Y	Y	Y
NADH dehydrogenase [ubiquinone] iron-sulfur protein 4, mitochondrial	W5PE07	NDUFS4	794064	1.06408	Up	0.198211	0.406719	1.00627	Up	0.909241	0.967839	1.07075	Up	0.250879	0.567146	800826	852141	857482	1.06408	0.0896037	1.00627	0.00901523	1.07075	0.098619	Ovis aries	9940	Welch one-way test	N	N	N	N	N	N	N
Cell division cycle 42	W5PE11	CDC42	525658	1.07166	Up	0.258317	0.472725	1.06939	Down	0.265209	0.700719	1.00213	Up	0.978804	0.991353	517588	554680	518688	1.07166	0.0998502	0.935113	-0.0967869	1.00213	0.00306338	Ovis aries	9940	Welch one-way test	N	N	Y	N	Y	Y	Y
S-formylglutathione hydrolase	W5PE27	ESD	496908	1.03711	Down	0.484541	0.664834	1.0347	Down	0.465601	0.843412	1.0731	Down	0.27209	0.597086	474681	457695	442344	0.964214	-0.0525742	0.966462	-0.0492152	0.931876	-0.101789	Ovis aries	9940	Welch one-way test	N	N	N	N	Y	Y	Y
Acid sphingomyelinase-like phosphodiesterase	W5PE73	SMPDL3A	132907	1.07329	Up	0.239325	0.455583	1.10621	Up	0.224413	0.691647	1.18729	Up	0.092331	0.386348	133240	143005	158194	1.07329	0.102045	1.10621	0.145623	1.18729	0.247668	Ovis aries	9940	Welch one-way test	N	Y	N	N	N	N	Y
Succinate--CoA ligase [ADP-forming] subunit beta, mitochondrial	W5PEA4	SUCLA2	614215	1.01622	Down	0.874129	0.91734	1.0117	Down	0.88448	0.967839	1.02811	Down	0.831657	0.924759	710408	699068	690982	0.984037	-0.0232159	0.988434	-0.0167841	0.972655	-0.0399999	Ovis aries	9940	Welch one-way test	N	N	N	N	N	N	N
Annexin	W5PEC3	ANXA6	395217	1.17448	Up	0.054796	0.184628	1.00258	Up	0.977074	0.987343	1.17751	Up	0.179768	0.518309	385110	452303	453471	1.17448	0.232018	1.00258	0.00372168	1.17751	0.23574	Ovis aries	9940	Welch one-way test	N	N	Y	Y	Y	Y	Y
Hydroxyacyl-CoA dehydrogenase	W5PEH2	HADH	5.91066e+06	1.10456	Down	0.06857	0.200631	1.02159	Up	0.719105	0.90044	1.08122	Down	0.262725	0.583013	6.16049e+06	5.57733e+06	5.69773e+06	0.905338	-0.143471	1.02159	0.0308141	0.924883	-0.112657	Ovis aries	9940	Welch one-way test	N	N	N	N	N	N	N
Osteoglycin	W5PEL2	OGN	218161	1.71623	Up	0.019734	0.107516	1.2837	Down	0.079508	0.537161	1.33694	Up	0.109994	0.409883	283805	487074	379429	1.71623	0.779241	0.778997	-0.360309	1.33694	0.418932	Ovis aries	9940	Welch one-way test	N	N	N	N	N	N	N
Heparan sulfate proteoglycan 2	W5PEL7	HSPG2	3.5575e+06	1.09627	Down	0.297139	0.507557	1.04547	Up	0.691482	0.899183	1.04859	Down	0.717181	0.877217	3.34992e+06	3.05574e+06	3.19469e+06	0.912182	-0.132607	1.04547	0.0641541	0.95366	-0.0684525	Ovis aries	9940	Welch one-way test	N	N	Y	Y	Y	Y	Y
Integrin subunit alpha 1	W5PEN0	ITGA1	25336.7	1.12238	Up	0.200256	0.407738	1.24044	Down	0.004595	0.225986	1.10519	Down	0.365414	0.668234	26453.8	29691.2	23936	1.12238	0.16656	0.806165	-0.310853	0.904823	-0.144293	Ovis aries	9940	Welch one-way test	N	N	N	N	N	N	N
ATP synthase subunit beta	W5PEP7	ATP5F1B	2.68007e+07	1.02764	Down	0.599225	0.749201	1.04889	Up	0.332796	0.740399	1.02068	Up	0.690126	0.865396	2.69701e+07	2.62446e+07	2.75278e+07	0.9731	-0.0393406	1.04889	0.0688654	1.02068	0.0295249	Ovis aries	9940	Welch one-way test	N	N	Y	Y	Y	Y	Y
Ribosomal protein S19	W5PEV6	RPS19	225659	1.08142	Up	0.273909	0.486265	1.06932	Down	0.312187	0.729668	1.01132	Up	0.83873	0.928121	230608	249384	233217	1.08142	0.112931	0.935172	-0.0966971	1.01132	0.0162335	Ovis aries	9940	Welch one-way test	N	N	N	N	N	N	N
Cathepsin V	W5PEY2	CTSV	448352	1.21223	Up	0.099109	0.257553	1.03915	Up	0.647397	0.87576	1.25969	Up	0.000929	0.073391	446220	540920	562098	1.21223	0.277659	1.03915	0.0554067	1.25969	0.333066	Ovis aries	9940	Welch one-way test	N	N	Y	N	N	Y	Y
Hydroxysteroid 17-beta dehydrogenase 10	W5PF12	HSD17B10	1.96352e+06	1.06758	Down	0.375594	0.578702	1.03254	Down	0.61805	0.867498	1.10231	Down	0.281225	0.606157	2.15004e+06	2.01395e+06	1.95048e+06	0.936701	-0.0943395	0.968487	-0.0461958	0.907183	-0.140535	Ovis aries	9940	Welch one-way test	N	N	N	N	N	N	N
ATP synthase subunit e, mitochondrial	W5PF18	LOC101102454	1.49707e+06	1.04824	Down	0.353877	0.554535	1.07135	Up	0.237582	0.700719	1.02205	Up	0.717765	0.877217	1.53894e+06	1.46812e+06	1.57287e+06	0.953979	-0.067971	1.07135	0.09943	1.02205	0.031459	Ovis aries	9940	Welch one-way test	N	N	N	N	N	N	N
GM2 ganglioside activator	W5PF33	GM2A	658445	2.04647	Up	0.002334	0.0439014	1.15271	Down	0.297418	0.720737	1.77536	Up	0.001238	0.0752323	681084	1.39382e+06	1.20917e+06	2.04647	1.03314	0.867523	-0.205026	1.77536	0.828114	Ovis aries	9940	Welch one-way test	N	N	N	N	Y	Y	Y
Transferrin	W5PF65	TF	1.15422e+06	1.48868	Up	0.046347	0.16951	1.41178	Down	0.039996	0.41198	1.05447	Up	0.582339	0.805688	1.15628e+06	1.72133e+06	1.21926e+06	1.48868	0.574032	0.708327	-0.497513	1.05447	0.0765191	Ovis aries	9940	Welch one-way test	N	Y	Y	Y	Y	Y	Y
Karyopherin subunit beta 1	W5PF71	KPNB1	138785	1.04102	Up	0.467894	0.654223	1.04238	Down	0.496534	0.846103	1.0013	Down	0.981883	0.991928	137382	143018	137204	1.04102	0.0580028	0.959346	-0.0598764	0.998702	-0.00187361	Ovis aries	9940	Welch one-way test	N	N	N	N	Y	Y	Y
Ribosomal_L18_c domain-containing protein	W5PF97	NA	259649	1.19263	Up	0.012898	0.0885072	1.12478	Down	0.132281	0.590469	1.06033	Up	0.499005	0.762503	260282	310420	275983	1.19263	0.254147	0.889065	-0.169639	1.06033	0.0845087	Ovis aries	9940	Welch one-way test	N	N	N	N	N	N	N
Alkaline phosphatase	W5PFB9	ALPL	83764.2	1.01996	Down	0.887835	0.925316	1.34084	Down	0.042626	0.42626	1.3676	Down	0.113286	0.414333	97322.9	95418.4	71163.1	0.980431	-0.0285118	0.745801	-0.423138	0.731206	-0.45165	Ovis aries	9940	Welch one-way test	N	N	N	N	N	N	N
Acyl-coenzyme A oxidase	W5PFE6	ACOX1	800481	1.18648	Down	0.060896	0.189005	1.33209	Up	0.006276	0.242049	1.12272	Up	0.192506	0.535236	823500	694068	924559	0.842827	-0.246691	1.33209	0.413689	1.12272	0.166997	Ovis aries	9940	Welch one-way test	N	N	N	N	N	N	N
Vinculin	W5PFI7	VCL	1.14597e+06	1.17269	Up	0.002164	0.0437776	1.04584	Down	0.405962	0.80175	1.12129	Up	0.09041	0.386348	1.14465e+06	1.34232e+06	1283480	1.17269	0.229823	0.956165	-0.0646683	1.12129	0.165155	Ovis aries	9940	Welch one-way test	N	N	Y	Y	Y	Y	Y
ETHE1 persulfide dioxygenase	W5PFR7	ETHE1	598956	1.09778	Down	0.323633	0.528244	1.00707	Up	0.918347	0.969632	1.09008	Down	0.219641	0.550846	628522	572539	576586	0.910929	-0.134589	1.00707	0.0101613	0.917368	-0.124428	Ovis aries	9940	Welch one-way test	N	N	N	N	N	N	N
Fructose-1,6-bisphosphatase 1	W5PFR8	FBP1	8.54412e+06	1.2146	Down	0.142819	0.323287	1.07962	Up	0.523727	0.846103	1.12502	Down	0.209653	0.5423	9.11883e+06	7.50769e+06	8.10546e+06	0.823317	-0.280481	1.07962	0.110526	0.888871	-0.169955	Ovis aries	9940	Welch one-way test	N	N	N	N	Y	Y	Y
Fructose-bisphosphatase 2	W5PFT7	FBP2	135787	1.47255	Up	0.203281	0.412833	1.0129	Up	0.955627	0.980007	1.49155	Up	0.279342	0.604603	181002	266535	269974	1.47255	0.55832	1.0129	0.018496	1.49155	0.576816	Ovis aries	9940	Welch one-way test	N	N	N	N	N	N	N
Aminopeptidase	W5PFV5	NPEPPS	258910	1.11921	Down	0.165022	0.358152	1.06269	Up	0.272898	0.709176	1.05318	Down	0.37756	0.674824	274940	245656	261056	0.893489	-0.162478	1.06269	0.0877211	0.949502	-0.074757	Ovis aries	9940	Welch one-way test	N	N	N	N	Y	Y	Y
Coatomer subunit alpha	W5PFV7	COPA	105983	1.10932	Up	0.030006	0.12883	1.05105	Down	0.287609	0.718209	1.05544	Up	0.249359	0.567146	106031	117622	111909	1.10932	0.149669	0.95143	-0.0718308	1.05544	0.0778387	Ovis aries	9940	Welch one-way test	N	Y	N	N	N	N	Y
Voltage dependent anion channel 2	W5PG36	VDAC2	3.43565e+06	1.02174	Down	0.631555	0.771141	1.01286	Down	0.766185	0.925613	1.03488	Down	0.56016	0.800214	3.4733e+06	3.39941e+06	3.35624e+06	0.978725	-0.0310239	0.987303	-0.0184357	0.966298	-0.0494596	Ovis aries	9940	Welch one-way test	N	N	N	N	N	N	N
Uncharacterized protein	W5PG64	BSG	807075	1.00275	Up	0.970728	0.978157	1.08201	Down	0.2526	0.700719	1.07905	Down	0.368984	0.671653	821222	823477	761063	1.00275	0.00395503	0.924207	-0.113713	0.926744	-0.109757	Ovis aries	9940	Welch one-way test	N	N	Y	N	Y	Y	Y
Pyruvate carboxylase	W5PG75	PC	4.31112e+06	1.1935	Down	0.039069	0.151297	1.03494	Up	0.50345	0.846103	1.15321	Down	0.070263	0.351315	3.91065e+06	3.27661e+06	3.39109e+06	0.83787	-0.255201	1.03494	0.0495416	0.867142	-0.20566	Ovis aries	9940	Welch one-way test	N	N	N	N	N	N	N
Uncharacterized protein	W5PG95	HSPA1A	1.53083e+06	1.03661	Down	0.783427	0.866817	1.29213	Down	0.064057	0.50642	1.33944	Down	0.076737	0.369648	1.58081e+06	1.52498e+06	1.1802e+06	0.964684	-0.051872	0.773913	-0.369757	0.746581	-0.421629	Ovis aries	9940	Welch one-way test	N	N	Y	Y	Y	Y	Y
Hydroxysteroid 17-beta dehydrogenase 8	W5PG98	HSD17B8	358969	1.05908	Up	0.124562	0.302708	1.0124	Up	0.801513	0.945292	1.07221	Up	0.251558	0.567146	354883	375850	380510	1.05908	0.0828147	1.0124	0.0177781	1.07221	0.100593	Ovis aries	9940	Welch one-way test	N	N	N	N	N	N	N
Carnitine O-acetyltransferase	W5PGA4	CRAT	964238	1.03039	Down	0.694055	0.820814	1.06006	Up	0.421088	0.809391	1.0288	Up	0.721104	0.877217	939874	912155	966938	0.970508	-0.0431881	1.06006	0.084145	1.0288	0.0409569	Ovis aries	9940	Welch one-way test	N	N	N	N	N	N	N
NAD-dependent protein deacetylase	W5PGB0	SIRT3	320551	1.04203	Down	0.487059	0.664834	1.00508	Up	0.936253	0.973233	1.03676	Down	0.672552	0.855995	297648	285642	287095	0.959666	-0.0593951	1.00508	0.00731554	0.964545	-0.0520796	Ovis aries	9940	Welch one-way test	N	N	Y	N	N	Y	Y
Charged multivesicular body protein 4B	W5PGC1	CHMP4B	74677.9	1.05958	Up	0.433495	0.628649	1.07194	Down	0.377371	0.773822	1.01167	Down	0.90035	0.953454	75574.7	80077.1	74703.1	1.05958	0.0834864	0.93289	-0.100222	0.988467	-0.0167352	Ovis aries	9940	Welch one-way test	N	N	N	N	N	N	N
Aldose 1-epimerase	W5PGC5	GALM	1.71953e+06	1.00848	Down	0.909605	0.940099	1.04815	Up	0.426197	0.815244	1.03934	Up	0.434921	0.712454	1.68522e+06	1.67105e+06	1.75151e+06	0.991596	-0.012176	1.04815	0.067842	1.03934	0.0556659	Ovis aries	9940	Welch one-way test	N	N	Y	N	Y	Y	Y
Acyl-CoA dehydrogenase family member 11	W5PGK3	ACAD11	1.42764e+06	1.22481	Up	0.031708	0.132536	1.03564	Up	0.624936	0.867498	1.26846	Up	0.00567	0.131074	1.39687e+06	1.7109e+06	1.77188e+06	1.22481	0.292556	1.03564	0.0505232	1.26846	0.343079	Ovis aries	9940	Welch one-way test	Y	N	N	N	N	N	N
Succinyl-CoA:3-ketoacid-coenzyme A transferase	W5PGM1	OXCT1	1.07217e+07	1.22229	Down	0.01447	0.0907754	1.22039	Up	0.022935	0.358133	1.00156	Down	0.98529	0.992355	10972280	8.9768e+06	10955229	0.818134	-0.28959	1.22039	0.287347	0.998446	-0.0022437	Ovis aries	9940	Welch one-way test	N	N	N	N	N	N	N
Uncharacterized protein	W5PGN1	HNRNPK	1.84272e+06	1.16536	Up	0.03584	0.142279	1.1612	Down	0.0211	0.358133	1.00358	Up	0.952545	0.981109	1.88839e+06	2.20066e+06	1.89515e+06	1.16536	0.220781	0.861175	-0.215621	1.00358	0.00515933	Ovis aries	9940	Welch one-way test	N	N	N	N	N	N	N
Phosphotriesterase related	W5PGQ7	PTER	364185	1.9727	Down	0.00018	0.0155179	1.72777	Up	0.003284	0.184123	1.14176	Down	0.307362	0.624206	377947	191589	331022	0.50692	-0.98017	1.72777	0.788913	0.875842	-0.191258	Ovis aries	9940	Welch one-way test	N	N	N	N	N	N	N
Myosin heavy chain 11	W5PGT0	MYH11	202773	1.07971	Up	0.512347	0.68953	1.14995	Down	0.220865	0.690438	1.06506	Down	0.579579	0.804809	189006	204070	177460	1.07971	0.110639	0.869603	-0.201571	0.938916	-0.0909319	Ovis aries	9940	Welch one-way test	N	N	Y	Y	N	Y	Y
Dolichyl-diphosphooligosaccharide--protein glycosyltransferase 48 kDa subunit	W5PGX0	DDOST	191093	1.14471	Up	0.011337	0.0840472	1.02345	Down	0.616151	0.867498	1.11848	Up	0.034929	0.26578	192575	220442	215392	1.14471	0.194977	0.97709	-0.0334371	1.11848	0.16154	Ovis aries	9940	Welch one-way test	N	N	Y	N	N	Y	Y
Copper transport protein ATOX1	W5PGY7	ATOX1	1.22882e+06	1.41428	Up	0.379754	0.578702	1.0086	Up	0.966442	0.981349	1.42644	Up	0.301756	0.623023	1.99124e+06	2.81618e+06	2.84038e+06	1.41428	0.50007	1.0086	0.0123474	1.42644	0.512417	Ovis aries	9940	Welch one-way test	N	N	N	N	N	N	N
Ribosomal protein S18	W5PH51	RPS18	1.34115e+06	1.13028	Up	0.048701	0.17409	1.09153	Down	0.243739	0.700719	1.0355	Up	0.668793	0.85493	1332951	1.5066e+06	1.38027e+06	1.13028	0.176676	0.916149	-0.126345	1.0355	0.050331	Ovis aries	9940	Welch one-way test	N	N	N	N	N	N	N
Tr-type G domain-containing protein	W5PHA3	NA	3.78096e+06	1.1432	Up	0.022052	0.113863	1.11731	Down	0.014227	0.321124	1.02318	Up	0.527976	0.776724	3.81165e+06	4.35748e+06	3.89999e+06	1.1432	0.193078	0.895011	-0.160023	1.02318	0.033055	Ovis aries	9940	Welch one-way test	N	N	N	N	N	N	N
Aminotran_1_2 domain-containing protein	W5PHB0	NA	560994	1.22332	Down	0.048067	0.172604	1.00462	Down	0.961936	0.981119	1.22898	Down	0.011241	0.174125	561342	458867	456756	0.817446	-0.290805	0.9954	-0.00665143	0.813686	-0.297456	Ovis aries	9940	Welch one-way test	N	N	N	N	N	N	N
Acyl-CoA dehydrogenase short/branched chain	W5PHF2	ACADSB	1.22642e+06	1.12346	Down	0.060377	0.189005	1.02457	Down	0.578663	0.860911	1.15106	Down	0.04616	0.296976	1.279e+06	1.13845e+06	1.11115e+06	0.890109	-0.167947	0.976022	-0.0350149	0.868765	-0.202962	Ovis aries	9940	Welch one-way test	Y	N	N	N	N	N	N
SERPIN domain-containing protein	W5PHP7	NA	546672	2.51871	Up	0.009549	0.0785803	1.53879	Down	0.057698	0.490123	1.63681	Up	0.00819	0.150467	576029	1.45085e+06	942851	2.51871	1.33268	0.649862	-0.621794	1.63681	0.710889	Ovis aries	9940	Welch one-way test	N	N	N	N	N	N	N
Rhodanese domain-containing protein	W5PHQ8	TSTD1	876294	1.03371	Down	0.639867	0.777685	1.05187	Down	0.51448	0.846103	1.08733	Down	0.382732	0.678261	909964	880285	836880	0.967385	-0.0478383	0.950692	-0.0729506	0.919685	-0.120789	Ovis aries	9940	Welch one-way test	N	N	N	N	N	N	N
Uncharacterized protein	W5PHR0	NA	2.71819e+06	1.06971	Down	0.234037	0.449852	1.01105	Up	0.844224	0.955497	1.05802	Down	0.226779	0.554095	2.65065e+06	2.47791e+06	2.50529e+06	0.934831	-0.0972224	1.01105	0.0158559	0.945162	-0.0813665	Ovis aries	9940	Welch one-way test	N	N	N	N	N	N	N
Adducin 3	W5PHR3	ADD3	280818	1.21928	Down	0.063153	0.192736	1.15464	Up	0.125821	0.590469	1.05599	Down	0.518305	0.769663	281120	230562	266215	0.820155	-0.286032	1.15464	0.207437	0.946979	-0.0785952	Ovis aries	9940	Welch one-way test	N	N	N	N	N	N	N
Heat shock protein 90 alpha family class B member 1	W5PHW0	HSP90AB1	312268	1.36267	Up	0.00369	0.0502603	1.30568	Down	0.002423	0.159514	1.04364	Up	0.386227	0.68107	297792	405792	310790	1.36267	0.446434	0.765883	-0.384804	1.04364	0.0616308	Ovis aries	9940	Welch one-way test	N	N	Y	Y	Y	Y	Y
AdoHcyase_NAD domain-containing protein	W5PHX1	AHCY	9.31864e+06	1.40157	Up	0.050599	0.178452	1.09418	Down	0.494799	0.846103	1.28093	Up	0.090489	0.386348	8.69823e+06	1.21912e+07	11141843	1.40157	0.487048	0.913924	-0.129854	1.28093	0.357194	Ovis aries	9940	Welch one-way test	N	N	Y	Y	Y	Y	Y
Citrate synthase	W5PI34	CS	1.57148e+06	1.02461	Down	0.720664	0.834115	1.09591	Up	0.106887	0.568621	1.06958	Up	0.274109	0.598245	1.59232e+06	1.55407e+06	1.70312e+06	0.97598	-0.0350771	1.09591	0.132126	1.06958	0.0970485	Ovis aries	9940	Welch one-way test	N	N	N	N	Y	Y	Y
Polypyrimidine tract binding protein 1	W5PI44	PTBP1	222868	1.16879	Up	0.068548	0.200631	1.04673	Down	0.548858	0.8504	1.11661	Up	0.191458	0.534459	219493	256542	245088	1.16879	0.225017	0.955354	-0.0658924	1.11661	0.159124	Ovis aries	9940	Welch one-way test	N	N	N	N	N	N	N
DAB adaptor protein 2	W5PI56	DAB2	1.9164e+06	1.11737	Up	0.131365	0.308394	1.05516	Up	0.403721	0.80175	1.17901	Up	0.046238	0.296976	1.78539e+06	1.99494e+06	2.10498e+06	1.11737	0.160106	1.05516	0.0774651	1.17901	0.237571	Ovis aries	9940	Welch one-way test	N	N	Y	N	N	Y	Y
NADH:ubiquinone oxidoreductase subunit A9	W5PI58	NDUFA9	341403	1.03728	Up	0.341781	0.545469	1.02344	Down	0.549849	0.8504	1.01352	Up	0.79611	0.912731	356811	370113	361636	1.03728	0.0528057	0.977098	-0.0334247	1.01352	0.019381	Ovis aries	9940	Welch one-way test	N	N	N	N	N	N	N
Apolipoprotein E	W5PI61	APOE	258667	1.45048	Up	0.000142	0.0155179	1.04361	Down	0.738359	0.90716	1.38986	Up	0.10572	0.404636	257954	374156	358519	1.45048	0.536526	0.958208	-0.0615891	1.38986	0.474937	Ovis aries	9940	Welch one-way test	N	Y	Y	Y	Y	Y	Y
Complement C9	W5PID9	C9	913596	1.82171	Up	0.006825	0.0751817	1.12984	Down	0.534905	0.8504	1.61236	Up	0.111867	0.413665	912204	1.66177e+06	1470806	1.82171	0.865294	0.885083	-0.176116	1.61236	0.689178	Ovis aries	9940	Welch one-way test	N	Y	Y	Y	Y	Y	Y
Uncharacterized protein	W5PIF1	SLC25A15	220600	1.13882	Up	0.262435	0.475513	1.01	Down	0.912709	0.967839	1.12754	Up	0.325681	0.633714	210680	239926	237551	1.13882	0.187535	0.990102	-0.0143516	1.12754	0.173184	Ovis aries	9940	Welch one-way test	N	N	N	N	N	N	N
Enolase 1	W5PIG7	ENO1	7.49914e+06	1.04122	Up	0.267498	0.481375	1.05405	Down	0.259052	0.700719	1.01232	Down	0.820258	0.920021	7.34836e+06	7.65128e+06	7.25893e+06	1.04122	0.0582774	0.948721	-0.0759441	0.987829	-0.0176666	Ovis aries	9940	Welch one-way test	N	N	Y	Y	Y	Y	Y
Solute carrier family 5 member 2	W5PIR1	SLC5A2	271634	1.25227	Down	0.010773	0.0834315	1.23284	Up	0.020972	0.358133	1.01576	Down	0.892179	0.953454	300815	240216	296149	0.798552	-0.324542	1.23284	0.301986	0.984487	-0.0225557	Ovis aries	9940	Welch one-way test	Y	N	N	N	N	N	N
Epoxide hydrolase 2	W5PIU4	EPHX2	1.6551e+06	1.1425	Down	0.138828	0.319176	1.04098	Up	0.668898	0.890049	1.09752	Down	0.214976	0.54433	1.68241e+06	1.47257e+06	1.53292e+06	0.875274	-0.192193	1.04098	0.057948	0.911146	-0.134245	Ovis aries	9940	Welch one-way test	N	N	N	N	Y	Y	Y
TPD52 like 2	W5PJ64	TPD52L2	626375	1.23388	Up	0.003525	0.0502603	1.01037	Down	0.869922	0.967128	1.22122	Up	0.030008	0.252195	644468	795196	787036	1.23388	0.303201	0.989739	-0.0148803	1.22122	0.288321	Ovis aries	9940	Welch one-way test	N	N	N	N	N	N	N
SH3 domain-containing protein	W5PJ75	NA	845766	1.15771	Down	0.015758	0.0957602	1.03145	Up	0.516503	0.846103	1.12242	Down	0.013513	0.189697	850659	734774	757880	0.863771	-0.21128	1.03145	0.0446677	0.890932	-0.166612	Ovis aries	9940	Welch one-way test	N	N	N	N	N	N	N
Serine/threonine-protein phosphatase 2A 55 kDa regulatory subunit B	W5PJ95	PPP2R2A	32868.3	1.01403	Up	0.744007	0.840866	1.01166	Up	0.833953	0.949312	1.02585	Up	0.713568	0.877217	33321.3	33788.8	34182.8	1.01403	0.0201004	1.01166	0.0167255	1.02585	0.0368259	Ovis aries	9940	Welch one-way test	N	N	N	N	N	N	N
Apolipoprotein A2	W5PJ97	APOA2	312859	1.85629	Down	0.000145	0.0155179	1.34214	Up	0.001595	0.128375	1.38308	Down	0.009344	0.159799	325478	175338	235328	0.53871	-0.892419	1.34214	0.424532	0.723023	-0.467887	Ovis aries	9940	Welch one-way test	N	Y	N	N	N	N	Y
F-actin-capping protein subunit beta	W5PJ98	CAPZB	205891	1.19718	Up	0.056312	0.18536	1.01344	Down	0.858902	0.962458	1.1813	Up	0.04572	0.296976	209558	250878	247552	1.19718	0.259639	0.98674	-0.0192584	1.1813	0.24038	Ovis aries	9940	Welch one-way test	N	N	Y	N	Y	Y	Y
Phosphoglucomutase 1	W5PJB6	PGM1	334685	1.0452	Up	0.673865	0.805088	1.0735	Up	0.333285	0.740399	1.12202	Up	0.135101	0.439217	347301	363000	389679	1.0452	0.0637842	1.0735	0.102317	1.12202	0.166102	Ovis aries	9940	Welch one-way test	N	N	Y	Y	N	Y	Y
Phosphoglucomutase 2	W5PJD0	PGM2	174212	1.12023	Up	0.22527	0.441596	1.05944	Down	0.379374	0.773822	1.05738	Up	0.555458	0.797916	179439	201013	189736	1.12023	0.163797	0.943898	-0.083297	1.05738	0.0805001	Ovis aries	9940	Welch one-way test	N	N	N	N	N	N	N
Calreticulin	W5PJG7	CALR	622946	1.12318	Up	0.103946	0.264895	1.09045	Down	0.232419	0.694461	1.03001	Up	0.721424	0.877217	642868	722056	662163	1.12318	0.167589	0.917052	-0.124925	1.03001	0.0426639	Ovis aries	9940	Welch one-way test	N	N	Y	Y	Y	Y	Y
Aldo_ket_red domain-containing protein	W5PJJ7	NA	2.20755e+06	1.20072	Down	0.213973	0.42989	1.05078	Down	0.724356	0.90044	1.2617	Down	0.024558	0.246322	2.23403e+06	1.86057e+06	1.77066e+06	0.832831	-0.263905	0.951673	-0.0714619	0.792583	-0.335367	Ovis aries	9940	Welch one-way test	N	N	N	N	N	N	N
Sulfotransferase	W5PJL5	SULT1B1	452785	1.05947	Up	0.732501	0.836237	1.00015	Down	0.999142	0.999142	1.0593	Up	0.595417	0.814248	479518	508033	507955	1.05947	0.0833379	0.999846	-0.000222371	1.0593	0.0831155	Ovis aries	9940	Welch one-way test	N	N	N	N	N	N	N
Cubilin	W5PJU0	CUBN	1.09819e+06	1.05738	Down	0.304064	0.514028	1.08022	Up	0.232952	0.694461	1.02159	Up	0.778183	0.905461	1.12169e+06	1.06081e+06	1.14591e+06	0.94573	-0.0805001	1.08022	0.111319	1.02159	0.0308193	Ovis aries	9940	Welch one-way test	Y	N	Y	Y	Y	Y	Y
Aldo_ket_red domain-containing protein	W5PJU2	NA	3.02683e+06	1.27664	Down	0.029922	0.12883	1.0551	Down	0.61682	0.867498	1.34698	Down	0.005623	0.131074	2.85009e+06	2.23249e+06	2.11591e+06	0.783307	-0.35235	0.947777	-0.0773801	0.742401	-0.42973	Ovis aries	9940	Welch one-way test	N	N	N	N	N	N	N
Chaperonin containing TCP1 subunit 6A	W5PJX0	CCT6A	323048	1.39501	Up	0.000932	0.0272696	1.03085	Down	0.622029	0.867498	1.35325	Up	0.000206	0.0233614	326515	455490	441858	1.39501	0.480271	0.970071	-0.0438372	1.35325	0.436434	Ovis aries	9940	Welch one-way test	N	N	N	N	Y	Y	Y
Uncharacterized protein	W5PJY3	LOC114116858	237589	1.077	Up	0.31349	0.520282	1.09351	Down	0.143034	0.601047	1.01533	Down	0.775634	0.905461	231080	248872	227591	1.077	0.107013	0.914489	-0.128963	0.984901	-0.0219495	Ovis aries	9940	Welch one-way test	N	N	N	N	N	N	N
D-aspartate oxidase	W5PK01	DDO	535717	1.24725	Down	0.299812	0.508265	1.07048	Up	0.759839	0.922078	1.16513	Down	0.449314	0.721459	538314	431600	462020	0.801763	-0.318752	1.07048	0.0982617	0.858274	-0.220491	Ovis aries	9940	Welch one-way test	N	N	N	N	N	N	N
PRA1 family protein	W5PK09	ARL6IP5	245208	1.07012	Down	0.532035	0.699675	1.1203	Up	0.170377	0.631764	1.04688	Up	0.699339	0.871416	225258	210497	235819	0.934471	-0.0977781	1.1203	0.16388	1.04688	0.0661023	Ovis aries	9940	Welch one-way test	N	N	N	N	N	N	N
Ornithine aminotransferase	W5PK12	OAT	424844	1.17863	Up	0.219722	0.436132	1.10075	Up	0.496696	0.846103	1.29738	Up	0.113202	0.414333	423343	498965	549236	1.17863	0.237111	1.10075	0.138488	1.29738	0.375598	Ovis aries	9940	Welch one-way test	N	N	N	N	N	N	N
LIM and SH3 protein 1	W5PK26	LASP1	1.01511e+06	1.00153	Up	0.981182	0.984843	1.04096	Down	0.586985	0.863535	1.03937	Down	0.667443	0.854587	1.07236e+06	1.074e+06	1.03174e+06	1.00153	0.00219998	0.960656	-0.0579078	0.962122	-0.0557078	Ovis aries	9940	Welch one-way test	N	N	Y	N	N	Y	Y
Parkinsonism associated deglycase	W5PK66	PARK7	1.8441e+06	1.07126	Down	0.314145	0.520282	1.02788	Down	0.617812	0.867498	1.10112	Down	0.121543	0.421136	1820903	1.69978e+06	1.65369e+06	0.933484	-0.0993025	0.97288	-0.0396661	0.908168	-0.138969	Ovis aries	9940	Welch one-way test	N	N	Y	Y	Y	Y	Y
von Willebrand factor A domain containing 5A	W5PK78	VWA5A	160445	1.31565	Up	0.003845	0.0506258	1.02141	Up	0.81524	0.946015	1.34383	Up	0.028858	0.251907	167226	220012	224723	1.31565	0.395781	1.02141	0.0305688	1.34383	0.426349	Ovis aries	9940	Welch one-way test	N	N	N	N	N	N	N
Heterogeneous nuclear ribonucleoprotein A2/B1	W5PK95	HNRNPA2B1	4.1515e+06	1.08309	Up	0.162018	0.354555	1.02047	Down	0.721156	0.90044	1.06136	Up	0.416408	0.705402	4.04211e+06	4377951	4.29015e+06	1.08309	0.115148	0.979944	-0.0292288	1.06136	0.0859191	Ovis aries	9940	Welch one-way test	N	N	Y	N	N	Y	Y
Tetratricopeptide repeat domain 36	W5PKA4	TTC36	172750	1.17204	Up	0.189649	0.397408	1.36717	Down	0.006242	0.242049	1.16649	Down	0.243995	0.567146	188407	220820	161516	1.17204	0.229017	0.731438	-0.451192	0.857272	-0.222175	Ovis aries	9940	Welch one-way test	N	N	N	N	N	N	N
Glutaryl-CoA dehydrogenase	W5PKD2	GCDH	2.15027e+06	1.11743	Down	0.118366	0.291611	1.03321	Up	0.665308	0.889476	1.08151	Down	0.346978	0.653588	2.18501e+06	1.95538e+06	2.02033e+06	0.894909	-0.160187	1.03321	0.0471365	0.924631	-0.11305	Ovis aries	9940	Welch one-way test	N	N	N	N	N	N	N
Uncharacterized protein	W5PKD3	GNAI2	974374	1.16351	Up	0.026826	0.123212	1.04897	Down	0.435852	0.822156	1.10919	Up	0.130506	0.43594	982613	1.14328e+06	1.08991e+06	1.16351	0.218486	0.953314	-0.0689766	1.10919	0.14951	Ovis aries	9940	Welch one-way test	N	N	Y	N	Y	Y	Y
Adenylate kinase 4	W5PKF1	AK4	2.28695e+06	1.06509	Down	0.490224	0.66657	1.1277	Up	0.114271	0.574994	1.05878	Up	0.452997	0.725898	2.34959e+06	2.20599e+06	2.4877e+06	0.938886	-0.0909775	1.1277	0.173381	1.05878	0.0824036	Ovis aries	9940	Welch one-way test	Y	N	N	N	N	N	N
Uncharacterized protein	W5PKN3	PDLIM2	112173	1.03513	Down	0.601085	0.750169	1.13046	Up	0.154814	0.611998	1.09209	Up	0.374199	0.674824	115380	111464	126005	0.966062	-0.0498128	1.13046	0.176905	1.09209	0.127093	Ovis aries	9940	Welch one-way test	N	N	N	N	N	N	N
Phospholysine phosphohistidine inorganic pyrophosphate phosphatase	W5PKU1	LHPP	289944	1.07726	Down	0.293062	0.504399	1.09858	Up	0.057554	0.490123	1.01979	Up	0.781331	0.90639	288795	268084	294511	0.928283	-0.107363	1.09858	0.13564	1.01979	0.0282767	Ovis aries	9940	Welch one-way test	N	N	N	N	N	N	N
Calbindin 1	W5PKW1	CALB1	7.13773e+06	1.49131	Down	0.008517	0.0764594	1.34985	Up	0.015774	0.327933	1.1048	Down	0.324247	0.633611	7.88776e+06	5.28916e+06	7.13955e+06	0.670553	-0.576577	1.34985	0.432795	0.905143	-0.143783	Ovis aries	9940	Welch one-way test	Y	N	Y	Y	Y	Y	Y
Quinoid dihydropteridine reductase	W5PKX5	QDPR	3.12289e+06	1.07359	Down	0.194851	0.401865	1.18286	Up	0.034078	0.390168	1.10178	Up	0.299127	0.623023	3.02916e+06	2.82151e+06	3.33745e+06	0.931451	-0.102449	1.18286	0.24228	1.10178	0.139831	Ovis aries	9940	Welch one-way test	N	N	Y	Y	Y	Y	Y
40S ribosomal protein S25	W5PL43	NA	1.00362e+06	1.21887	Up	0.047728	0.172604	1.05137	Down	0.559496	0.85424	1.15931	Up	0.19798	0.535236	994937	1.2127e+06	1.15345e+06	1.21887	0.285542	0.951141	-0.0722693	1.15931	0.213272	Ovis aries	9940	Welch one-way test	N	N	N	N	N	N	N
Growth hormone inducible transmembrane protein	W5PL52	GHITM	212368	1.01069	Up	0.910349	0.940099	1.1083	Up	0.149606	0.61146	1.12015	Up	0.183632	0.521832	229910	232368	257534	1.01069	0.0153403	1.1083	0.148354	1.12015	0.163694	Ovis aries	9940	Welch one-way test	N	N	N	N	N	N	N
Pyrophosphatase (inorganic) 2	W5PL66	PPA2	345792	1.05064	Down	0.545493	0.707618	1.00714	Down	0.9067	0.967839	1.05814	Down	0.580237	0.804809	392452	373538	370890	0.951805	-0.0712619	0.992912	-0.0102625	0.945059	-0.0815244	Ovis aries	9940	Welch one-way test	N	N	N	N	N	N	N
Succinate--CoA ligase [GDP-forming] subunit beta, mitochondrial	W5PL67	SUCLG2	4.96406e+06	1.04633	Down	0.378085	0.578702	1.04147	Up	0.522542	0.846103	1.00467	Down	0.947648	0.98051	5.08042e+06	4.85546e+06	5.05681e+06	0.95572	-0.0653402	1.04147	0.0586214	0.995354	-0.0067188	Ovis aries	9940	Welch one-way test	N	N	Y	Y	N	Y	Y
Multifunctional fusion protein	W5PL79	ALDH4A1	3.5572e+06	1.04131	Up	0.730775	0.836237	1.11402	Up	0.293325	0.720105	1.16005	Up	0.339123	0.645571	3.41836e+06	3.55959e+06	3.96546e+06	1.04131	0.0584065	1.11402	0.155775	1.16005	0.214182	Ovis aries	9940	Welch one-way test	Y	N	N	N	N	N	N
EH domain containing 1	W5PL84	EHD1	258581	1.06734	Up	0.000902	0.0272696	1.03363	Down	0.310023	0.729668	1.03262	Up	0.444904	0.717294	256223	273478	264582	1.06734	0.0940258	0.967469	-0.0477131	1.03262	0.0463127	Ovis aries	9940	Welch one-way test	N	N	Y	Y	Y	Y	Y
Uncharacterized protein	W5PL89	NA	662552	1.04408	Up	0.572158	0.726696	1.05214	Up	0.470739	0.843412	1.09852	Up	0.141177	0.451538	660592	689713	725674	1.04408	0.0622364	1.05214	0.073325	1.09852	0.135561	Ovis aries	9940	Welch one-way test	N	N	N	N	N	N	N
Uncharacterized protein	W5PLE9	ERP29	329048	1.00532	Up	0.931583	0.950841	1.04491	Up	0.467243	0.843412	1.05047	Up	0.513167	0.769041	330913	332673	347614	1.00532	0.00765324	1.04491	0.0633814	1.05047	0.0710346	Ovis aries	9940	Welch one-way test	N	N	N	N	N	N	N
2,4-dienoyl-CoA reductase 1	W5PLF3	DECR1	43372	1.31167	Down	0.073131	0.207818	1.05216	Up	0.732748	0.904486	1.24665	Down	0.069556	0.351315	44131.5	33645.2	35400.1	0.762385	-0.391408	1.05216	0.0733527	0.80215	-0.318055	Ovis aries	9940	Welch one-way test	N	N	N	N	N	N	N
V-SNARE coiled-coil homology domain-containing protein	W5PLN5	NA	258934	1.04769	Down	0.418875	0.622465	1.06527	Up	0.255089	0.700719	1.01679	Up	0.766423	0.903242	259829	248002	264191	0.954483	-0.0672079	1.06527	0.0912256	1.01679	0.0240178	Ovis aries	9940	Welch one-way test	N	N	N	N	N	N	N
Aldedh domain-containing protein	W5PLV2	ALDH2	1.84268e+06	1.167	Down	0.258512	0.472725	1.08253	Down	0.468712	0.843412	1.26331	Down	0.032614	0.253241	1.86399e+06	1597246	1.47548e+06	0.856896	-0.222808	0.923764	-0.114404	0.79157	-0.337212	Ovis aries	9940	Welch one-way test	N	N	Y	Y	N	Y	Y
Acyl-CoA dehydrogenase very long chain	W5PLW6	ACADVL	1.78321e+06	1.01999	Down	0.803628	0.878265	1.08263	Down	0.30237	0.721265	1.10428	Down	0.050362	0.307784	1.82701e+06	1.7912e+06	1.65448e+06	0.980398	-0.0285605	0.923676	-0.114541	0.90557	-0.143101	Ovis aries	9940	Welch one-way test	N	N	Y	Y	N	Y	Y
Ribosomal_L7Ae domain-containing protein	W5PMC5	LOC101110546	337271	1.1497	Up	0.096587	0.25358	1.16344	Down	0.024093	0.360493	1.01195	Down	0.898725	0.953454	356632	410019	352420	1.1497	0.201258	0.85952	-0.218398	0.98819	-0.01714	Ovis aries	9940	Welch one-way test	N	N	N	N	N	N	N
4-hydroxy-2-oxoglutarate aldolase 1	W5PMQ2	HOGA1	2.63822e+06	1.03698	Down	0.790805	0.870106	1.03813	Down	0.72932	0.901663	1.07652	Down	0.657767	0.850468	2.89119e+06	2.78809e+06	2.68568e+06	0.964339	-0.0523877	0.963268	-0.0539915	0.928917	-0.106379	Ovis aries	9940	Welch one-way test	Y	N	N	N	N	N	N
Uncharacterized protein	W5PN31	NA	229504	1.32592	Down	0.00112	0.0303258	1.06936	Up	0.395093	0.790186	1.23992	Down	0.00488	0.131074	229946	173424	185452	0.754194	-0.406993	1.06936	0.0967445	0.806503	-0.310249	Ovis aries	9940	Welch one-way test	N	N	N	N	N	N	N
Aldo_ket_red domain-containing protein	W5PN69	LOC101109111	783555	2.32631	Down	0.000566	0.0243653	1.09087	Down	0.728967	0.901663	2.53769	Down	0.000845	0.073391	829324	356498	326802	0.429865	-1.21804	0.916703	-0.125474	0.394059	-1.34352	Ovis aries	9940	Welch one-way test	N	N	N	N	N	N	N
Eukaryotic translation elongation factor 2	W5PN84	EEF2	1.02519e+06	1.17611	Up	0.019406	0.107516	1.06321	Down	0.214843	0.68715	1.10619	Up	0.074091	0.36339	1.10151e+06	1.2955e+06	1.21849e+06	1.17611	0.234026	0.940552	-0.0884202	1.10619	0.145606	Ovis aries	9940	Welch one-way test	N	N	Y	N	Y	Y	Y
Acetyl-CoA acetyltransferase 1	W5PN85	ACAT1	5.22604e+06	1.17034	Down	0.133522	0.311157	1.05477	Down	0.501241	0.846103	1.23444	Down	0.09801	0.391784	5.48369e+06	4.68554e+06	4.44225e+06	0.854451	-0.226931	0.948076	-0.0769257	0.810084	-0.303856	Ovis aries	9940	Welch one-way test	N	N	Y	Y	N	Y	Y
Small ubiquitin-related modifier	W5PN98	NA	369924	1.00801	Down	0.874376	0.91734	1.0084	Up	0.903124	0.967839	1.00039	Up	0.995981	0.998129	378742	375733	378889	0.992054	-0.0115091	1.0084	0.0120686	1.00039	0.000559459	Ovis aries	9940	Welch one-way test	N	N	N	N	N	N	N
Uncharacterized protein	W5PNG6	NA	374586	1.06673	Down	0.542739	0.705204	1.02611	Down	0.802957	0.945359	1.09458	Down	0.491295	0.756575	376618	353059	344075	0.937445	-0.0931942	0.974554	-0.0371862	0.913591	-0.13038	Ovis aries	9940	Welch one-way test	N	N	N	N	N	N	N
NSF attachment protein alpha	W5PNM6	NAPA	193429	1.07978	Down	0.17525	0.37503	1.03301	Up	0.505767	0.846103	1.04528	Down	0.321348	0.633611	188500	174572	180335	0.926111	-0.110743	1.03301	0.046854	0.956682	-0.063889	Ovis aries	9940	Welch one-way test	N	N	N	N	N	N	N
Uncharacterized protein	W5PNP2	LOC101108419	90729.4	1.07711	Down	0.816177	0.883481	1.50916	Up	0.106039	0.568621	1.40112	Up	0.078655	0.374322	90021.7	83577	126131	0.928409	-0.107167	1.50916	0.59375	1.40112	0.486583	Ovis aries	9940	Welch one-way test	N	N	N	N	N	N	N
Succinate dehydrogenase complex iron sulfur subunit B	W5PNR7	SDHB	1.63531e+06	1.08372	Up	0.335644	0.537847	1.02741	Up	0.687703	0.899183	1.11342	Up	0.17178	0.502616	1.65485e+06	1793394	1.84255e+06	1.08372	0.115991	1.02741	0.0390104	1.11342	0.155001	Ovis aries	9940	Welch one-way test	N	N	Y	Y	N	Y	Y
Microtubule-associated protein	W5PNU3	MAPT	260792	1.12443	Down	0.111312	0.280947	1.22608	Up	0.022995	0.358133	1.0904	Up	0.324008	0.633611	273145	242918	297837	0.889338	-0.169196	1.22608	0.294052	1.0904	0.124856	Ovis aries	9940	Welch one-way test	N	N	Y	Y	N	Y	Y
Pyridoxal kinase	W5PNY4	PDXK	379699	1.14035	Down	0.035613	0.142092	1.0966	Down	0.090743	0.559289	1.25051	Down	0.000207	0.0233614	385127	337728	307977	0.876925	-0.189474	0.911909	-0.133038	0.799676	-0.322512	Ovis aries	9940	Welch one-way test	N	N	N	N	Y	Y	Y
2-amino-3-carboxymuconate-6-semialdehyde decarboxylase	W5PNY8	ACMSD	939132	1.31779	Down	0.250385	0.466519	1.1267	Up	0.564447	0.85424	1.1696	Down	0.403551	0.696081	833838	632753	712925	0.758844	-0.398125	1.1267	0.172108	0.854992	-0.226017	Ovis aries	9940	Welch one-way test	Y	N	Y	N	N	Y	Y
ATP synthase F1 subunit delta	W5PP03	ATP5F1D	2.74289e+06	1.09252	Down	0.119355	0.291921	1.06612	Up	0.323045	0.740399	1.02477	Down	0.726341	0.877384	2.76897e+06	2.53448e+06	2.70205e+06	0.915315	-0.127659	1.06612	0.0923649	0.975833	-0.0352942	Ovis aries	9940	Welch one-way test	N	N	N	N	N	N	N
Guanine nucleotide-binding protein subunit gamma	W5PP04	GNG12	510667	1.10025	Down	0.311857	0.520273	1.03758	Down	0.577651	0.860911	1.14161	Down	0.140221	0.450303	511038	464473	447649	0.908881	-0.137836	0.963777	-0.0532284	0.875959	-0.191065	Ovis aries	9940	Welch one-way test	N	N	N	N	Y	Y	Y
ATPase ASNA1	W5PP30	ASNA1	553103	1.01147	Down	0.814089	0.883421	1.0621	Up	0.131277	0.590469	1.05005	Up	0.406249	0.69854	575337	568812	604133	0.988659	-0.0164551	1.0621	0.0869145	1.05005	0.0704594	Ovis aries	9940	Welch one-way test	N	N	N	N	N	N	N
ATP synthase subunit d, mitochondrial	W5PP37	ATP5PD	3.27282e+06	1.05222	Down	0.398715	0.600049	1.03344	Up	0.545718	0.8504	1.01817	Down	0.810212	0.91569	3.41272e+06	3.24334e+06	3.35181e+06	0.950368	-0.0734419	1.03344	0.0474589	0.982151	-0.025983	Ovis aries	9940	Welch one-way test	N	N	N	N	N	N	N
Alanine--glyoxylate aminotransferase 2	W5PPB3	AGXT2	985248	1.02199	Up	0.837891	0.894505	1.02122	Up	0.823484	0.946015	1.04368	Up	0.698972	0.871416	964139	985344	1.00625e+06	1.02199	0.0313866	1.02122	0.0302925	1.04368	0.0616791	Ovis aries	9940	Welch one-way test	Y	N	N	N	N	N	N
Glyoxylate and hydroxypyruvate reductase	W5PPD5	GRHPR	662552	1.08157	Down	0.379588	0.578702	1.07932	Up	0.338095	0.740399	1.00209	Down	0.97149	0.988563	645172	596515	643829	0.924584	-0.113123	1.07932	0.110117	0.997919	-0.00300604	Ovis aries	9940	Welch one-way test	N	N	Y	N	Y	Y	Y
Cytochrome c oxidase subunit 4I1	W5PPE8	COX4I1	6.33709e+06	1.13144	Down	0.067989	0.200631	1.01559	Up	0.798672	0.945292	1.11407	Down	0.212004	0.5423	6.17969e+06	5.46179e+06	5.54695e+06	0.883829	-0.178161	1.01559	0.0223211	0.897609	-0.15584	Ovis aries	9940	Welch one-way test	N	N	N	N	N	N	N
Aldedh domain-containing protein	W5PPG3	NA	4.68225e+06	1.00513	Up	0.915634	0.944322	1.01268	Up	0.716831	0.90044	1.01788	Up	0.703075	0.874274	4.94667e+06	4.97205e+06	5.0351e+06	1.00513	0.00738431	1.01268	0.0181787	1.01788	0.025563	Ovis aries	9940	Welch one-way test	N	N	N	N	N	N	N
Ribosomal protein S3	W5PPH6	RPS3	476068	1.16933	Up	0.026176	0.121688	1.13711	Down	0.021495	0.358133	1.02833	Up	0.639161	0.841562	484513	566554	498239	1.16933	0.225677	0.87942	-0.185376	1.02833	0.0403002	Ovis aries	9940	Welch one-way test	N	N	N	N	Y	Y	Y
3-hydroxybutyrate dehydrogenase 2	W5PPP4	BDH2	1.24754e+06	1.04603	Down	0.61449	0.754972	1.09046	Up	0.380707	0.773822	1.04247	Up	0.721769	0.877217	1.16286e+06	1111684	1.21225e+06	0.955992	-0.0649299	1.09046	0.124939	1.04247	0.0600087	Ovis aries	9940	Welch one-way test	Y	N	N	N	Y	Y	Y
Clathrin light chain	W5PPS6	CLTA	228934	1.03901	Up	0.551999	0.713697	1.01627	Down	0.823928	0.946015	1.02238	Up	0.806924	0.913281	239745	249098	245110	1.03901	0.0552144	0.98399	-0.0232841	1.02238	0.0319304	Ovis aries	9940	Welch one-way test	N	N	N	N	N	N	N
Tubulin beta chain	W5PPT6	TUBB	2.8946e+06	1.00762	Down	0.840118	0.895599	1.03965	Up	0.409096	0.80175	1.03179	Up	0.616379	0.83354	2.87464e+06	2.85291e+06	2.96602e+06	0.992438	-0.010951	1.03965	0.0560961	1.03179	0.0451451	Ovis aries	9940	Welch one-way test	N	N	N	N	N	N	N
Sepiapterin reductase	W5PPU0	SPR	479460	1.10675	Up	0.274816	0.486695	1.04063	Down	0.51717	0.846103	1.06354	Up	0.411859	0.70274	525335	581413	558712	1.10675	0.146326	0.960956	-0.0574582	1.06354	0.0888676	Ovis aries	9940	Welch one-way test	N	N	N	N	N	N	N
Ribosomal protein S15	W5PQ79	RPS15	56871.6	1.10104	Up	0.321556	0.52594	1.03812	Down	0.680817	0.895594	1.06061	Up	0.478414	0.744056	60211.2	66295	63860.7	1.10104	0.138868	0.963281	-0.0539717	1.06061	0.0848965	Ovis aries	9940	Welch one-way test	N	N	N	N	N	N	N
Pyridine nucleotide-disulphide oxidoreductase domain 2	W5PQ85	PYROXD2	49509	1.17643	Down	0.434414	0.628649	1.158	Down	0.468338	0.843412	1.36231	Down	0.216575	0.54661	49449.5	42033.4	36298.2	0.850027	-0.23442	0.863556	-0.211638	0.734046	-0.446058	Ovis aries	9940	Welch one-way test	N	N	N	N	N	N	N
Actin related protein 3	W5PQ98	ACTR3	154612	1.12325	Up	0.238242	0.454616	1.0502	Down	0.550445	0.8504	1.06956	Up	0.286198	0.606157	150693	169266	161175	1.12325	0.167679	0.952197	-0.0706678	1.06956	0.097011	Ovis aries	9940	Welch one-way test	N	N	N	N	N	N	N
Peroxiredoxin	W5PQA8	PRDX6	8.98313e+06	1.1027	Down	0.027657	0.125569	1.10208	Up	0.067309	0.50642	1.00057	Down	0.993283	0.998129	9.16136e+06	8.30811e+06	9.15616e+06	0.906863	-0.141043	1.10208	0.140223	0.999432	-0.00081947	Ovis aries	9940	Welch one-way test	N	N	Y	N	Y	Y	Y
60S acidic ribosomal protein P0	W5PQC5	NA	102213	1.16986	Up	0.091249	0.243536	1.08329	Down	0.335595	0.740399	1.07992	Up	0.275531	0.598245	103717	121335	112006	1.16986	0.226338	0.923114	-0.11542	1.07992	0.110918	Ovis aries	9940	Welch one-way test	N	N	N	N	N	N	N
Serpin family H member 1	W5PQE5	SERPINH1	251036	1.60935	Up	0.014202	0.0907754	1.42666	Down	0.027416	0.379976	1.12805	Up	0.351043	0.658727	264314	425375	298160	1.60935	0.686482	0.700936	-0.512646	1.12805	0.173836	Ovis aries	9940	Welch one-way test	N	N	N	N	N	N	N
T-complex protein 1 subunit eta	W5PQF0	CCT7	328071	1.24701	Up	0.0048	0.0583283	1.13264	Down	0.033086	0.389784	1.10097	Up	0.028091	0.251907	332595	414749	366178	1.24701	0.318471	0.88289	-0.179694	1.10097	0.138777	Ovis aries	9940	Welch one-way test	N	N	Y	Y	N	Y	Y
Aminopeptidase	W5PQH2	ANPEP	1.89599e+06	1.1681	Up	0.533621	0.699675	2.38476	Down	0.006871	0.242049	2.04157	Down	0.020753	0.237607	1.61468e+06	1.88611e+06	790902	1.1681	0.224167	0.419329	-1.25384	0.48982	-1.02968	Ovis aries	9940	Welch one-way test	Y	N	Y	Y	Y	Y	Y
Alpha-methylacyl-CoA racemase	W5PQJ5	AMACR	690579	1.2187	Down	0.23757	0.454432	1.07594	Up	0.432855	0.820037	1.13269	Down	0.439317	0.71265	641917	526721	566718	0.820544	-0.285348	1.07594	0.105593	0.882853	-0.179755	Ovis aries	9940	Welch one-way test	Y	N	N	N	N	N	N
Talin 1	W5PQK6	TLN1	462850	1.30106	Up	0.000267	0.0155179	1.06387	Down	0.107796	0.568621	1.22295	Up	0.00277	0.0897756	473460	616000	579017	1.30106	0.379687	0.939964	-0.0893232	1.22295	0.290364	Ovis aries	9940	Welch one-way test	N	N	Y	Y	Y	Y	Y
Eukaryotic translation initiation factor 5A	W5PQK7	EIF5A	742200	1.05256	Down	0.576622	0.73119	1.05694	Up	0.516788	0.846103	1.00416	Up	0.968057	0.988563	746282	709013	749385	0.950061	-0.0739082	1.05694	0.0798954	1.00416	0.00598718	Ovis aries	9940	Welch one-way test	N	N	Y	N	N	Y	Y
Uncharacterized protein	W5PQL4	TPM2	865334	1.17563	Up	0.313906	0.520282	1.26016	Down	0.144513	0.602712	1.0719	Down	0.682426	0.864225	911002	1.071e+06	849892	1.17563	0.233437	0.793548	-0.333611	0.93292	-0.100175	Ovis aries	9940	Welch one-way test	N	N	Y	Y	N	Y	Y
Ribosomal protein L18	W5PQR5	RPL18	599891	1.20973	Up	0.009394	0.0781185	1.06329	Down	0.227286	0.693266	1.13773	Up	0.00882	0.158359	628173	759920	714690	1.20973	0.274685	0.940481	-0.0885294	1.13773	0.186156	Ovis aries	9940	Welch one-way test	N	N	N	N	N	N	N
2,4-dienoyl-CoA reductase 2	W5PQX6	DECR2	1.53217e+06	1.1781	Down	0.12922	0.307481	1.04428	Up	0.717631	0.90044	1.12815	Down	0.227249	0.554095	1.50306e+06	1.27584e+06	1.33233e+06	0.848824	-0.236462	1.04428	0.062502	0.886406	-0.17396	Ovis aries	9940	Welch one-way test	N	N	N	N	N	N	N
Cystathionine gamma-lyase	W5PQY4	CTH	888849	1.08308	Up	0.42057	0.622465	1.12745	Down	0.125748	0.590469	1.04096	Down	0.706848	0.875503	1.03277e+06	1.11858e+06	992132	1.08308	0.115138	0.88696	-0.173059	0.960648	-0.0579209	Ovis aries	9940	Welch one-way test	N	N	N	N	N	N	N
Isocitrate dehydrogenase [NADP]	W5PR04	IDH2	1.17438e+07	1.03559	Down	0.432818	0.628649	1.04886	Up	0.264601	0.700719	1.01282	Up	0.832283	0.924759	1.20419e+07	1.16281e+07	1.21963e+07	0.965637	-0.0504476	1.04886	0.0688275	1.01282	0.0183799	Ovis aries	9940	Welch one-way test	N	N	N	N	Y	Y	Y
Abhydrolase domain containing 11	W5PR16	ABHD11	30456.7	1.05349	Down	0.557955	0.71789	1.13128	Up	0.132295	0.590469	1.07385	Up	0.489111	0.754683	30697.8	29139.2	32964.7	0.949228	-0.075174	1.13128	0.177961	1.07385	0.102787	Ovis aries	9940	Welch one-way test	N	N	N	N	N	N	N
Acyl-coenzyme A oxidase	W5PR45	ACOX2	21979.6	2.60904	Up	0.050571	0.178452	1.06697	Down	0.827801	0.946588	2.44529	Up	0.02645	0.251907	23905.3	62369.9	58455.3	2.60904	1.38352	0.937236	-0.0935161	2.44529	1.29	Ovis aries	9940	Welch one-way test	N	N	N	N	N	N	N
Methylmalonyl-CoA mutase	W5PR64	MMUT	1.08942e+06	1.12207	Down	0.263889	0.477053	1.32625	Up	0.002033	0.146006	1.18196	Up	0.002409	0.0880491	1.11652e+06	995058	1.31969e+06	0.89121	-0.166162	1.32625	0.407347	1.18196	0.241185	Ovis aries	9940	Welch one-way test	N	N	Y	Y	N	Y	Y
Coronin	W5PR73	CORO1B	219974	1.03662	Down	0.833295	0.89201	1.13572	Down	0.431405	0.819255	1.17731	Down	0.143777	0.455908	204620	197392	173804	0.964672	-0.0518894	0.880501	-0.183604	0.849394	-0.235494	Ovis aries	9940	Welch one-way test	N	N	N	N	N	N	N
Stomatin like 2	W5PRD7	STOML2	166973	1.10571	Up	0.304513	0.514028	1.0309	Down	0.709413	0.90044	1.07257	Up	0.267584	0.592133	167563	185276	179723	1.10571	0.14497	0.970031	-0.0438978	1.07257	0.101072	Ovis aries	9940	Welch one-way test	N	N	N	N	Y	Y	Y
Valosin containing protein	W5PRJ4	VCP	1.16287e+06	1.0345	Up	0.651957	0.78633	1.08567	Up	0.217438	0.688867	1.12313	Up	0.085314	0.383351	1.23125e+06	1.27373e+06	1.38286e+06	1.0345	0.0489345	1.08567	0.118588	1.12313	0.167523	Ovis aries	9940	Welch one-way test	N	N	Y	Y	Y	Y	Y
Pyruvate dehydrogenase E1 component subunit beta	W5PRM8	NA	930288	1.08475	Down	0.453852	0.646339	1.10012	Up	0.199244	0.67146	1.01418	Up	0.894382	0.953454	1.00698e+06	928311	1.02126e+06	0.921875	-0.117356	1.10012	0.137666	1.01418	0.0203101	Ovis aries	9940	Welch one-way test	N	N	N	N	N	N	N
14_3_3 domain-containing protein	W5PRN8	NA	1.6071e+06	1.03696	Up	0.550207	0.712563	1.09451	Down	0.102696	0.568621	1.0555	Down	0.205856	0.5423	1.62428e+06	1684322	1.53888e+06	1.03696	0.052364	0.91365	-0.130287	0.947421	-0.077923	Ovis aries	9940	Welch one-way test	N	N	N	N	N	N	N
Na(+)/H(+) exchange regulatory cofactor NHE-RF	W5PRP1	SLC9A3R1	7.94652e+06	1.08967	Down	0.155392	0.342904	1.00634	Up	0.898166	0.967839	1.08281	Down	0.214687	0.54433	7.90207e+06	7.25178e+06	7.29772e+06	0.917706	-0.123896	1.00634	0.00911126	0.92352	-0.114785	Ovis aries	9940	Welch one-way test	N	N	Y	N	Y	Y	Y
Hydroxysteroid 17-beta dehydrogenase 14	W5PRQ8	HSD17B14	1.06182e+06	1.07385	Down	0.5303	0.699675	1.15658	Up	0.142982	0.601047	1.07704	Up	0.498681	0.762503	1.11069e+06	1.03431e+06	1.19626e+06	0.931226	-0.102797	1.15658	0.209868	1.07704	0.107072	Ovis aries	9940	Welch one-way test	Y	N	N	N	N	N	N
Dimethylaniline monooxygenase [N-oxide-forming]	W5PRR0	FMO3	950342	1.77737	Down	0.000275	0.0155179	1.37874	Up	0.007047	0.242049	1.28913	Down	0.028594	0.251907	979112	550876	759512	0.562628	-0.829747	1.37874	0.463346	0.775715	-0.366401	Ovis aries	9940	Welch one-way test	N	N	N	N	N	N	N
Isoleucyl-tRNA synthetase 2, mitochondrial	W5PRZ6	IARS2	132847	1.0103	Up	0.811337	0.882382	1.00232	Up	0.953798	0.980007	1.01264	Up	0.724267	0.877217	134002	135382	135696	1.0103	0.0147804	1.00232	0.00334014	1.01264	0.0181205	Ovis aries	9940	Welch one-way test	N	N	N	N	N	N	N
Anion exchange protein	W5PS41	SLC4A4	1.33429e+06	1.01752	Up	0.723252	0.834115	1.05154	Up	0.417031	0.803548	1.06996	Up	0.313771	0.629157	1.33301e+06	1.35636e+06	1.42628e+06	1.01752	0.0250526	1.05154	0.0725105	1.06996	0.0975631	Ovis aries	9940	Welch one-way test	Y	N	N	N	N	N	N
Alpha-mannosidase	W5PS45	NA	390936	1.06993	Down	0.516672	0.692209	1.20028	Up	0.186186	0.665552	1.12183	Up	0.456099	0.727203	414861	387747	465404	0.934644	-0.0975117	1.20028	0.263366	1.12183	0.165855	Ovis aries	9940	Welch one-way test	N	N	N	N	N	N	N
Aspartate aminotransferase	W5PS88	GOT1	1.06501e+06	1.05945	Up	0.305294	0.514248	1.01195	Up	0.815512	0.946015	1.07212	Up	0.244141	0.567146	1.03154e+06	1.09287e+06	1.10593e+06	1.05945	0.08332	1.01195	0.0171436	1.07212	0.100464	Ovis aries	9940	Welch one-way test	N	N	Y	Y	Y	Y	Y
Diazepam binding inhibitor, acyl-CoA binding protein	W5PSF3	DBI	1.67926e+06	1.03248	Down	0.677055	0.805532	1.07559	Up	0.368308	0.765967	1.04176	Up	0.652034	0.84722	1.68888e+06	1.63576e+06	1.75941e+06	0.968546	-0.0461071	1.07559	0.10513	1.04176	0.0590234	Ovis aries	9940	Welch one-way test	N	N	Y	N	Y	Y	Y
Crystallin zeta	W5PSF8	CRYZ	7.87458e+06	1.24321	Down	7e-05	0.013825	1.09934	Up	0.096897	0.563589	1.13087	Down	0.052448	0.312068	7.78858e+06	6.26491e+06	6.88724e+06	0.804371	-0.314066	1.09934	0.136632	0.884274	-0.177434	Ovis aries	9940	Welch one-way test	Y	N	N	N	Y	Y	Y
HD domain containing 3	W5PSG8	HDDC3	64804	1.20517	Down	0.044677	0.165703	1.08271	Up	0.366237	0.765967	1.1131	Down	0.224403	0.552762	67091.3	55669.6	60274.2	0.829759	-0.269236	1.08271	0.114651	0.898391	-0.154585	Ovis aries	9940	Welch one-way test	N	N	N	N	N	N	N
4-hydroxyphenylpyruvate dioxygenase	W5PSL9	HPD	4.19605e+06	1.09473	Up	0.223086	0.439421	1.04044	Down	0.616931	0.867498	1.05218	Up	0.605808	0.825941	4184039	4.58041e+06	4.40238e+06	1.09473	0.130581	0.961132	-0.0571934	1.05218	0.0733872	Ovis aries	9940	Welch one-way test	N	N	N	N	Y	Y	Y
Uncharacterized protein	W5PSQ7	NA	3.16963e+06	1.29753	Up	0.055358	0.184628	1.2634	Up	0.106494	0.568621	1.6393	Up	0.019608	0.227799	3.0483e+06	3955260	4997075	1.29753	0.375768	1.2634	0.337311	1.6393	0.713079	Ovis aries	9940	Welch one-way test	N	N	N	N	N	N	N
Ribosomal protein L8	W5PSW9	RPL8	224694	1.27343	Up	0.022446	0.114094	1.08761	Down	0.302819	0.721265	1.17086	Up	0.067179	0.34761	225030	286560	263478	1.27343	0.348721	0.91945	-0.121156	1.17086	0.227564	Ovis aries	9940	Welch one-way test	N	N	N	N	N	N	N
Annexin	W5PSZ5	ANXA1	747226	1.37799	Up	0.02865	0.126885	1.04786	Down	0.696991	0.899183	1.31505	Up	0.058871	0.344504	690273	951189	907744	1.37799	0.462565	0.954326	-0.0674461	1.31505	0.395119	Ovis aries	9940	Welch one-way test	N	Y	Y	Y	Y	Y	Y
Triokinase and FMN cyclase	W5PSZ8	TKFC	1.0598e+06	1.33266	Down	0.009173	0.0776889	1.11331	Up	0.199366	0.67146	1.19703	Down	0.005342	0.131074	1.0822e+06	812057	904068	0.750377	-0.414313	1.11331	0.15485	0.835399	-0.259463	Ovis aries	9940	Welch one-way test	N	N	N	N	Y	Y	Y
Acyl-CoA synthetase medium chain family member 5	W5PT05	ACSM5	207721	1.54428	Down	0.012996	0.0885072	1.39348	Down	0.105247	0.568621	2.15191	Down	7e-06	0.00553	214737	139053	99788.9	0.647552	-0.626931	0.71763	-0.478688	0.464703	-1.10562	Ovis aries	9940	Welch one-way test	N	N	N	N	N	N	N
RNA binding motif protein 47	W5PT36	RBM47	78826.1	1.03774	Down	0.578719	0.731501	1.03042	Up	0.532204	0.849376	1.00711	Down	0.891227	0.953454	77080.7	74277.2	76536.8	0.963629	-0.0534502	1.03042	0.0432342	0.992944	-0.0102161	Ovis aries	9940	Welch one-way test	N	N	N	N	N	N	N
Histone H2A	W5PT38	LOC101121387	22568.2	1.10247	Down	0.641206	0.778115	1.07228	Down	0.751499	0.91336	1.18216	Down	0.416848	0.705402	23480	21297.6	19861.9	0.907053	-0.140742	0.932589	-0.100687	0.845907	-0.241429	Ovis aries	9940	Welch one-way test	N	N	N	N	N	N	N
Filamin B	W5PT68	FLNB	484897	1.33735	Up	0.001181	0.0303258	1.19695	Down	0.009509	0.259038	1.1173	Up	0.081162	0.375888	477658	638797	533688	1.33735	0.41938	0.835457	-0.259362	1.1173	0.160018	Ovis aries	9940	Welch one-way test	N	N	Y	Y	Y	Y	Y
Glycoprotein nmb	W5PT76	GPNMB	2.7186e+06	1.20927	Up	0.267407	0.481375	1.19927	Up	0.321715	0.740399	1.45024	Up	0.183016	0.521832	2.3954e+06	2.89669e+06	3.4739e+06	1.20927	0.274138	1.19927	0.262153	1.45024	0.536291	Ovis aries	9940	Welch one-way test	N	N	Y	N	Y	Y	Y
Uncharacterized protein	W5PTA0	ATP5PO	4.75598e+06	1.01487	Up	0.810266	0.882382	1.04867	Up	0.413579	0.80175	1.06426	Up	0.310568	0.627603	4.7527e+06	4.82338e+06	5.05811e+06	1.01487	0.0212975	1.04867	0.068554	1.06426	0.0898516	Ovis aries	9940	Welch one-way test	N	N	N	N	N	N	N
HtrA serine peptidase 2	W5PTC7	HTRA2	166278	1.02831	Up	0.604757	0.751192	1.06554	Up	0.254573	0.700719	1.09571	Up	0.198861	0.535236	158279	162760	173428	1.02831	0.0402781	1.06554	0.0915889	1.09571	0.131867	Ovis aries	9940	Welch one-way test	N	N	N	N	N	N	N
Uncharacterized protein	W5PTE9	NA	930325	1.39641	Up	0.00785	0.0764594	1.08075	Up	0.60931	0.867498	1.50916	Up	0.07583	0.36752	850844	1.18812e+06	1.28406e+06	1.39641	0.481717	1.08075	0.112031	1.50916	0.593749	Ovis aries	9940	Welch one-way test	N	N	N	N	N	N	N
Peptidase M20 domain-containing protein 2	W5PTG8	PM20D2	314865	1.04754	Up	0.585876	0.739364	1.00949	Down	0.911734	0.967839	1.03769	Up	0.62262	0.833613	321440	336720	333555	1.04754	0.0670043	0.990599	-0.0136269	1.03769	0.0533774	Ovis aries	9940	Welch one-way test	N	N	N	N	N	N	N
GC vitamin D binding protein	W5PTG9	GC	387312	1.94002	Up	0.002803	0.0471143	1.62636	Down	0.006403	0.242049	1.19286	Up	0.252703	0.567146	404030	783826	481952	1.94002	0.956071	0.614871	-0.701644	1.19286	0.254427	Ovis aries	9940	Welch one-way test	N	Y	N	N	N	N	Y
Ubiquitin conjugating enzyme E2 V2	W5PTM9	UBE2V2	382204	1.05093	Up	0.464291	0.650604	1.02257	Up	0.717402	0.90044	1.07465	Up	0.328775	0.636599	368376	387138	395877	1.05093	0.0716691	1.02257	0.0322017	1.07465	0.103871	Ovis aries	9940	Welch one-way test	N	N	N	N	N	N	N
Collagen type VI alpha 2 chain	W5PTN6	COL6A2	354027	1.21866	Up	0.115264	0.287251	1.1244	Up	0.511042	0.846103	1.37026	Up	0.209193	0.5423	330460	402719	452817	1.21866	0.285298	1.1244	0.169156	1.37026	0.454453	Ovis aries	9940	Welch one-way test	N	N	N	N	Y	Y	Y
Acyl-CoA synthetase medium chain family member 1	W5PTQ8	ACSM1	3.2373e+06	1.2306	Up	0.153332	0.339306	1.20178	Up	0.077204	0.53501	1.47891	Up	8e-05	0.0158	3.17467e+06	3.90674e+06	4.69505e+06	1.2306	0.299358	1.20178	0.265174	1.47891	0.564532	Ovis aries	9940	Welch one-way test	N	N	N	N	N	N	N
Heat shock protein family A (Hsp70) member 5	W5PTR5	HSPA5	2.17161e+06	1.3002	Up	0.009244	0.0776889	1.15164	Down	0.064259	0.50642	1.129	Up	0.098194	0.391784	2.2134e+06	2.87785e+06	2.49893e+06	1.3002	0.378732	0.86833	-0.203684	1.129	0.175048	Ovis aries	9940	Welch one-way test	N	N	Y	Y	Y	Y	Y
Acyl-coenzyme A oxidase	W5PTR6	ACOX3	466844	1.24437	Down	0.129741	0.307794	1.02056	Up	0.852042	0.958361	1.21929	Down	0.130782	0.43594	461299	370710	378333	0.803623	-0.31541	1.02056	0.0293633	0.820146	-0.286047	Ovis aries	9940	Welch one-way test	N	N	N	N	N	N	N
CDGSH iron sulfur domain 1	W5PTS5	CISD1	2.68378e+06	1.09007	Down	0.060564	0.189005	1.05891	Up	0.102967	0.568621	1.02942	Down	0.57437	0.804809	2.69189e+06	2.46947e+06	2.61495e+06	0.917372	-0.124421	1.05891	0.0825837	0.971417	-0.0418374	Ovis aries	9940	Welch one-way test	N	N	N	N	N	N	N
Carbonic anhydrase	W5PTU7	CA2	1.06139e+07	1.14768	Up	0.033489	0.135673	1.05138	Down	0.412911	0.80175	1.09159	Up	0.271614	0.597086	1.10636e+07	1.26974e+07	1.20769e+07	1.14768	0.198719	0.95113	-0.072286	1.09159	0.126433	Ovis aries	9940	Welch one-way test	N	N	Y	Y	Y	Y	Y
Angiotensin-converting enzyme	W5PTV7	ACE	486810	1.12891	Down	0.336944	0.538838	1.09115	Down	0.388269	0.782481	1.23181	Down	0.1201	0.421136	512900	454332	416380	0.88581	-0.174931	0.916467	-0.125845	0.811816	-0.300776	Ovis aries	9940	Welch one-way test	N	Y	N	N	N	N	Y
IQ motif containing GTPase activating protein 1	W5PU66	IQGAP1	49703.1	1.19802	Up	0.012872	0.0885072	1.07017	Down	0.246518	0.700719	1.11947	Up	0.105417	0.404636	50558.3	60570.1	56598.4	1.19802	0.260658	0.934428	-0.0978445	1.11947	0.162813	Ovis aries	9940	Welch one-way test	N	N	N	N	N	N	N
G protein subunit alpha 11	W5PU75	GNA11	332707	1.00685	Up	0.901953	0.936324	1.03943	Down	0.35957	0.75952	1.03235	Down	0.588238	0.808188	322976	325190	312855	1.00685	0.0098546	0.962069	-0.0557874	0.968663	-0.0459328	Ovis aries	9940	Welch one-way test	N	N	Y	Y	Y	Y	Y
Aldehyde dehydrogenase family 16 member A1	W5PU89	ALDH16A1	406119	1.01806	Up	0.817513	0.883481	1.05039	Up	0.304433	0.722228	1.06936	Up	0.417884	0.705402	406702	414046	434912	1.01806	0.02582	1.05039	0.0709291	1.06936	0.0967491	Ovis aries	9940	Welch one-way test	N	N	N	N	N	N	N
Acyl-CoA dehydrogenase short chain	W5PUC2	ACADS	3.26594e+06	1.02475	Up	0.763089	0.855093	1.06974	Down	0.520493	0.846103	1.04391	Down	0.698054	0.871416	3201666	3.2809e+06	3.06701e+06	1.02475	0.0352681	0.934807	-0.0972589	0.957941	-0.0619908	Ovis aries	9940	Welch one-way test	N	N	N	N	N	N	N
Mitochondrial amidoxime reducing component 2	W5PUD8	37316	2.04317e+06	1.06805	Up	0.425491	0.625284	1.01433	Down	0.866271	0.965238	1.05296	Up	0.552034	0.795815	2.0313e+06	2.16953e+06	2.13887e+06	1.06805	0.0949826	0.985869	-0.0205326	1.05296	0.07445	Ovis aries	9940	Welch one-way test	N	N	N	N	N	N	N
Acyl-CoA synthetase medium chain family member 3	W5PUH2	ACSM3	1.2469e+06	1.45712	Down	0.012841	0.0885072	1.5093	Up	0.000356	0.114023	1.03581	Up	0.737103	0.884972	1.26269e+06	866567	1307908	0.686286	-0.543117	1.5093	0.593877	1.03581	0.05076	Ovis aries	9940	Welch one-way test	N	N	N	N	N	N	N
Legumain	W5PUH5	LGMN	952086	1.38366	Up	0.174079	0.373702	1.35456	Down	0.137275	0.597982	1.02148	Up	0.878293	0.950366	883428	1.22236e+06	902404	1.38366	0.468485	0.738248	-0.437823	1.02148	0.030662	Ovis aries	9940	Welch one-way test	N	N	Y	Y	Y	Y	Y
Uncharacterized protein	W5PUH7	NA	1.70054e+06	1.19629	Down	0.131946	0.308394	1.05353	Up	0.637176	0.870881	1.13551	Down	0.198139	0.535236	1.71164e+06	1.43079e+06	1.50738e+06	0.835918	-0.258566	1.05353	0.0752287	0.880664	-0.183337	Ovis aries	9940	Welch one-way test	N	N	N	N	N	N	N
Clathrin heavy chain	W5PUT6	CLTC	2.17786e+06	1.13709	Up	0.014392	0.0907754	1.00175	Down	0.963732	0.981119	1.1351	Up	0.024258	0.246322	2.26971e+06	2.58086e+06	2.57634e+06	1.13709	0.185345	0.998249	-0.0025285	1.1351	0.182816	Ovis aries	9940	Welch one-way test	N	N	Y	Y	N	Y	Y
Histone H2A	W5PV69	HIST2H2AB	1.04446e+06	1.17416	Up	0.028393	0.126748	1.00163	Up	0.977345	0.987343	1.17607	Up	0.017022	0.216893	1.00978e+06	1.18565e+06	1.18758e+06	1.17416	0.231635	1.00163	0.00234445	1.17607	0.233979	Ovis aries	9940	Welch one-way test	N	N	N	N	N	N	N
Acylaminoacyl-peptide hydrolase	W5PV74	APEH	314378	1.1212	Down	0.185136	0.388983	1.0408	Down	0.545739	0.8504	1.16695	Down	0.04147	0.292512	324870	289751	278392	0.891898	-0.165049	0.960796	-0.0576985	0.856932	-0.222748	Ovis aries	9940	Welch one-way test	N	N	N	N	N	N	N
GTP:AMP phosphotransferase AK3, mitochondrial	W5PVD4	AK3	3.06364e+06	1.05304	Down	0.518728	0.693393	1.01279	Down	0.886238	0.967839	1.0665	Down	0.454207	0.726363	3010127	2.85852e+06	2822423	0.949633	-0.0745578	0.987373	-0.0183323	0.937642	-0.0928901	Ovis aries	9940	Welch one-way test	N	N	N	N	N	N	N
Ferritin	W5PVJ0	NA	2.27341e+06	1.52418	Down	0.430388	0.628478	2.5813	Up	0.052291	0.47914	1.69356	Up	0.302048	0.623023	2.56177e+06	1.68075e+06	4.33851e+06	0.65609	-0.608035	2.5813	1.3681	1.69356	0.760062	Ovis aries	9940	Welch one-way test	N	N	N	N	N	N	N
Uncharacterized protein	W5PVL5	HSPA4	160546	1.17798	Up	0.023052	0.114535	1.25851	Down	0.001487	0.128375	1.06836	Down	0.138539	0.448211	164549	193836	154020	1.17798	0.236315	0.79459	-0.331717	0.936011	-0.0954022	Ovis aries	9940	Welch one-way test	N	N	N	N	N	N	N
Glutathione transferase	W5PVN0	LOC101111664	1.15163e+06	1.71627	Down	0.000441	0.0221665	1.26211	Up	0.198162	0.67146	1.35984	Down	0.066301	0.346873	1.17781e+06	686265	866139	0.58266	-0.779273	1.26211	0.335833	0.735379	-0.44344	Ovis aries	9940	Welch one-way test	N	N	N	N	N	N	N
Transmembrane protein 120A	W5PVQ4	TMEM120A	59028.1	1.00433	Down	0.968042	0.976696	1.11878	Up	0.478821	0.846103	1.11395	Up	0.622953	0.833613	52015.3	51790.8	57942.7	0.995684	-0.0062402	1.11878	0.161931	1.11395	0.155691	Ovis aries	9940	Welch one-way test	N	N	N	N	N	N	N
Ribosomal protein S17	W5PVR4	RPS17	83831	1.2869	Up	0.000463	0.0221665	1.15275	Down	0.013444	0.312375	1.11637	Up	0.037538	0.269627	83539.5	107507	93261.2	1.2869	0.363899	0.86749	-0.20508	1.11637	0.158818	Ovis aries	9940	Welch one-way test	N	N	N	N	N	N	N
Ubiquitin like modifier activating enzyme 1	W5PVT6	UBA1	649637	1.03116	Up	0.6348	0.772715	1.05318	Down	0.399548	0.797078	1.02136	Down	0.703846	0.874274	620964	640315	607980	1.03116	0.0442733	0.949501	-0.0747589	0.979091	-0.0304855	Ovis aries	9940	Welch one-way test	N	N	Y	Y	Y	Y	Y
Drebrin like	W5PVX4	DBNL	50326.2	1.05967	Down	0.282305	0.49228	1.00471	Down	0.92999	0.970531	1.06466	Down	0.364629	0.668234	52257	49314.6	49083.4	0.943694	-0.0836095	0.995312	-0.00677964	0.939269	-0.0903891	Ovis aries	9940	Welch one-way test	N	N	N	N	N	N	N
Acyl-CoA dehydrogenase family member 8	W5PW04	ACAD8	315774	1.08379	Down	0.295344	0.507221	1.02574	Up	0.736597	0.906424	1.05659	Down	0.345005	0.653534	324141	299081	306780	0.922688	-0.116085	1.02574	0.0366644	0.946438	-0.0794207	Ovis aries	9940	Welch one-way test	N	N	N	N	N	N	N
Malate dehydrogenase 2	W5PW05	MDH2	1.52871e+07	1.1161	Down	0.021188	0.111796	1.09612	Up	0.073826	0.525428	1.01823	Down	0.707052	0.875503	1.52784e+07	13689099	1.50049e+07	0.895976	-0.158468	1.09612	0.13241	0.9821	-0.0260577	Ovis aries	9940	Welch one-way test	N	N	N	N	Y	Y	Y
Cytochrome c oxidase subunit 5B	W5PW27	COX5B	2.28416e+06	1.28808	Down	0.007453	0.0763363	1.04445	Up	0.507434	0.846103	1.23327	Down	0.042755	0.294409	2.29957e+06	1.78526e+06	1.86461e+06	0.776347	-0.365226	1.04445	0.0627373	0.810852	-0.302489	Ovis aries	9940	Welch one-way test	N	N	N	N	N	N	N
Lamin B2	W5PW39	LMNB2	209647	1.00416	Up	0.918403	0.945943	1.03803	Down	0.163346	0.623398	1.03373	Down	0.447475	0.71997	209756	210629	202912	1.00416	0.00599133	0.963362	-0.05385	0.967371	-0.0478586	Ovis aries	9940	Welch one-way test	N	N	Y	Y	Y	Y	Y
Uncharacterized protein	W5PW57	LOC101114408	487511	1.11155	Down	0.539986	0.703942	1.01472	Up	0.915432	0.968128	1.09543	Down	0.509003	0.765928	533485	479948	487011	0.899646	-0.152571	1.01472	0.0210766	0.912885	-0.131494	Ovis aries	9940	Welch one-way test	N	N	N	N	N	N	N
Uncharacterized protein	W5PW62	VDAC1	2.9179e+06	1.19013	Down	0.012691	0.0885072	1.03768	Up	0.414678	0.80175	1.14691	Down	0.06178	0.345733	3.06177e+06	2.57263e+06	2.66958e+06	0.840244	-0.25112	1.03768	0.0533678	0.871908	-0.197752	Ovis aries	9940	Welch one-way test	N	N	Y	N	Y	Y	Y
Heat shock protein family B (small) member 1	W5PWA8	HSPB1	6.65204e+06	1.02681	Down	0.748833	0.843906	1.00703	Down	0.911095	0.967839	1.03403	Down	0.629708	0.83468	6.55119e+06	6.38015e+06	6.3356e+06	0.97389	-0.0381685	0.993018	-0.0101082	0.967091	-0.0482767	Ovis aries	9940	Welch one-way test	N	N	Y	N	Y	Y	Y
14-3-3 protein gamma	W5PWD6	YWHAG	591838	1.02124	Down	0.847663	0.897013	1.08086	Down	0.404561	0.80175	1.10382	Down	0.167531	0.49709	580664	568585	526050	0.979198	-0.0303275	0.92519	-0.112178	0.905945	-0.142505	Ovis aries	9940	Welch one-way test	N	N	N	N	N	N	N
Serum albumin	W5PWE9	ALB	3.97017e+07	1.17217	Down	0.257135	0.472725	1.06529	Down	0.585289	0.863535	1.2487	Down	0.052538	0.312068	3.92103e+07	3.34512e+07	3.1401e+07	0.853121	-0.229177	0.938713	-0.0912443	0.800836	-0.320422	Ovis aries	9940	Welch one-way test	N	Y	Y	Y	Y	Y	Y
Uncharacterized protein	W5PWM0	NA	945232	1.00298	Up	0.976208	0.982426	1.05952	Down	0.543367	0.8504	1.05637	Down	0.6266	0.83468	876130	878744	829381	1.00298	0.00429732	0.943825	-0.083408	0.946641	-0.0791106	Ovis aries	9940	Welch one-way test	N	N	N	N	N	N	N
Crystallin lambda 1	W5PWX3	CRYL1	6.78433e+06	1.14123	Down	0.055622	0.184628	1.1953	Up	0.026287	0.377154	1.04738	Up	0.522502	0.77299	6734599	5.90116e+06	7.05367e+06	0.876245	-0.190594	1.1953	0.257375	1.04738	0.0667812	Ovis aries	9940	Welch one-way test	Y	N	N	N	Y	Y	Y
Small nuclear ribonucleoprotein Sm D3	W5PX22	SNRPD3	508021	1.21708	Up	0.007272	0.0763363	1.10154	Down	0.069816	0.510463	1.10489	Up	0.134263	0.438297	534991	651127	591104	1.21708	0.283424	0.907817	-0.139527	1.10489	0.143897	Ovis aries	9940	Welch one-way test	N	N	N	N	N	N	N
Aspartate dehydrogenase domain containing	W5PX74	ASPDH	1.34655e+06	1.0881	Down	0.334994	0.537847	1.03357	Up	0.493594	0.846103	1.05275	Down	0.610937	0.829279	1.31364e+06	1207280	1.24781e+06	0.919033	-0.121811	1.03357	0.0476424	0.949889	-0.0741689	Ovis aries	9940	Welch one-way test	Y	N	N	N	N	N	N
Fumarylacetoacetate hydrolase domain containing 2A	W5PXA6	FAHD2A	3.71794e+06	1.08103	Down	0.36498	0.566472	1.07257	Up	0.261243	0.700719	1.00789	Down	0.928509	0.97246	3.90633e+06	3.61351e+06	3.87573e+06	0.925041	-0.112411	1.07257	0.101067	0.992167	-0.0113445	Ovis aries	9940	Welch one-way test	N	N	N	N	N	N	N
Beta-ureidopropionase 1	W5PXC4	UPB1	2.5143e+06	1.05852	Up	0.722145	0.834115	1.05347	Up	0.620949	0.867498	1.11512	Up	0.524146	0.773973	2.78648e+06	2.94955e+06	3.10726e+06	1.05852	0.0820496	1.05347	0.0751469	1.11512	0.157197	Ovis aries	9940	Welch one-way test	N	N	N	N	N	N	N
COX6C domain-containing protein	W5PXG3	NA	2.40205e+06	1.04631	Up	0.530077	0.699675	1.08313	Down	0.216901	0.688867	1.03519	Down	0.75527	0.901304	2.55956e+06	2.67809e+06	2.47254e+06	1.04631	0.06531	0.923248	-0.11521	0.966003	-0.0498998	Ovis aries	9940	Welch one-way test	N	N	N	N	N	N	N
Carboxymethylenebutenolidase homolog	W5PXJ8	CMBL	596897	1.03128	Down	0.83084	0.890588	1.01471	Up	0.890174	0.967839	1.01633	Down	0.902814	0.954783	687715	666855	676668	0.969668	-0.0444371	1.01471	0.0210738	0.983936	-0.0233633	Ovis aries	9940	Welch one-way test	Y	N	N	N	Y	Y	Y
Dipeptidase	W5PXL2	DPEP1	1.35958e+06	1.55362	Down	0.014174	0.0907754	1.28923	Up	0.109723	0.570271	1.20507	Down	0.065914	0.346873	1.32865e+06	855200	1.10255e+06	0.643659	-0.635631	1.28923	0.366514	0.829827	-0.269117	Ovis aries	9940	Welch one-way test	Y	N	N	N	Y	Y	Y
40S ribosomal protein S6	W5PXV8	RPS6	678224	1.15288	Up	0.028992	0.126919	1.10693	Down	0.069038	0.510463	1.04151	Up	0.316296	0.630995	671640	774320	699520	1.15288	0.205241	0.903399	-0.146564	1.04151	0.0586765	Ovis aries	9940	Welch one-way test	N	N	N	N	N	N	N
Chaperonin containing TCP1 subunit 5	W5PXX7	CCT5	210918	1.21661	Up	0.019627	0.107516	1.11392	Down	0.099392	0.568621	1.09218	Up	0.060574	0.345733	210300	255853	229686	1.21661	0.282861	0.897727	-0.155652	1.09218	0.127209	Ovis aries	9940	Welch one-way test	N	N	N	N	N	N	N
Syntaxin 7	W5PY17	STX7	164102	1.09296	Up	0.139783	0.319176	1.00637	Down	0.907984	0.967839	1.08604	Up	0.183358	0.521832	162036	177098	175976	1.09296	0.12824	0.993666	-0.00916677	1.08604	0.119073	Ovis aries	9940	Welch one-way test	N	N	N	N	N	N	N
Histone H2A	W5PY18	H2AFV	1.15141e+06	1.11066	Up	0.081888	0.225406	1.03157	Up	0.385476	0.778839	1.14572	Up	0.023188	0.244671	1.19979e+06	1.33256e+06	1.37462e+06	1.11066	0.151417	1.03157	0.0448357	1.14572	0.196252	Ovis aries	9940	Welch one-way test	N	N	N	N	Y	Y	Y
Dimethylarginine dimethylaminohydrolase 1	W5PY34	DDAH1	163464	1.21552	Down	0.059514	0.188649	1.06664	Up	0.526199	0.846634	1.13959	Down	0.222956	0.552762	162831	133960	142886	0.822691	-0.281578	1.06664	0.0930696	0.877512	-0.188509	Ovis aries	9940	Welch one-way test	Y	N	N	N	Y	Y	Y
H1 histone family member X	W5PY64	H1FX	919796	1.01635	Up	0.818618	0.883481	1.0277	Down	0.62206	0.867498	1.01117	Down	0.842704	0.928502	967231	983049	956550	1.01635	0.0234037	0.973044	-0.0394229	0.988958	-0.0160192	Ovis aries	9940	Welch one-way test	N	N	N	N	N	N	N
NADH dehydrogenase [ubiquinone] 1 alpha subcomplex subunit 8	W5PYA5	NDUFA8	1.42469e+06	1.005	Up	0.924334	0.947114	1.03893	Down	0.408972	0.80175	1.03377	Down	0.569118	0.804809	1.49247e+06	1.49993e+06	1.44372e+06	1.005	0.00719277	0.962526	-0.0551031	0.967336	-0.0479103	Ovis aries	9940	Welch one-way test	N	N	N	N	N	N	N
Dopa decarboxylase	W5PYB5	DDC	1.10978e+06	1.36339	Down	0.003578	0.0502603	1.06514	Up	0.492683	0.846103	1.28001	Down	0.042857	0.294409	1.13246e+06	830616	884722	0.733465	-0.447201	1.06514	0.0910419	0.781242	-0.356159	Ovis aries	9940	Welch one-way test	Y	N	N	N	Y	Y	Y
NADH:ubiquinone oxidoreductase core subunit S8	W5PYC8	NDUFS8	1.01076e+06	1.04264	Down	0.615525	0.755069	1.03321	Down	0.631449	0.870393	1.07727	Down	0.22849	0.554173	1.02412e+06	982242	950666	0.959106	-0.0602384	0.967853	-0.0471399	0.928273	-0.107378	Ovis aries	9940	Welch one-way test	N	N	N	N	N	N	N
S-methyl-5'-thioadenosine phosphorylase	W5PYD1	MTAP	268487	1.01594	Up	0.818136	0.883481	1.02455	Up	0.74343	0.908579	1.04088	Up	0.645922	0.845857	265691	269927	276553	1.01594	0.022821	1.02455	0.0349861	1.04088	0.0578071	Ovis aries	9940	Welch one-way test	N	N	N	N	N	N	N
Solute carrier family 5 member 12	W5PYF4	SLC5A12	686077	1.35708	Down	0.000779	0.0272696	1.13847	Up	0.115373	0.575135	1.19202	Down	0.045916	0.296976	685192	504903	574814	0.736878	-0.440503	1.13847	0.18709	0.83891	-0.253413	Ovis aries	9940	Welch one-way test	Y	N	N	N	N	N	N
60S ribosomal protein L18a	W5PYH9	NA	106733	1.20007	Up	0.080772	0.223894	1.22534	Down	0.033551	0.389784	1.02105	Down	0.858853	0.937766	117855	141435	115425	1.20007	0.263117	0.816103	-0.293177	0.97938	-0.0300596	Ovis aries	9940	Welch one-way test	N	N	N	N	N	N	N
Eukaryotic translation initiation factor 4A1	W5PYK0	EIF4A1	94518.5	1.34366	Up	0.030907	0.13057	1.14359	Down	0.195688	0.67146	1.17495	Up	0.065108	0.346873	97194.9	130597	114200	1.34366	0.426171	0.874441	-0.193566	1.17495	0.232605	Ovis aries	9940	Welch one-way test	N	N	N	N	N	N	N
T-complex protein 1 subunit theta	W5PYM5	CCT8	615853	1.20453	Up	0.002453	0.0450667	1.06118	Down	0.223868	0.691647	1.13508	Up	0.029336	0.251907	602431	725646	683810	1.20453	0.26847	0.942346	-0.0856708	1.13508	0.182799	Ovis aries	9940	Welch one-way test	N	N	Y	Y	Y	Y	Y
40S ribosomal protein S12	W5PYQ7	RPS12	382466	1.17292	Up	0.016448	0.0984388	1.04279	Down	0.453412	0.842813	1.12479	Up	0.049133	0.30563	387240	454202	435562	1.17292	0.230105	0.958962	-0.060455	1.12479	0.16965	Ovis aries	9940	Welch one-way test	N	N	N	N	N	N	N
Pyruvate dehydrogenase E1 component subunit alpha	W5PYS5	PDHA1	728229	1.16983	Down	0.144036	0.324184	1.11302	Up	0.128829	0.590469	1.05104	Down	0.624351	0.833613	838137	716459	797436	0.854824	-0.226301	1.11302	0.154484	0.951438	-0.0718177	Ovis aries	9940	Welch one-way test	N	N	N	N	N	N	N
Gamma-butyrobetaine hydroxylase 1	W5PYU6	BBOX1	251959	1.03731	Up	0.781877	0.866315	1.17866	Up	0.13048	0.590469	1.22263	Up	0.001148	0.0752323	245523	254683	300184	1.03731	0.0528457	1.17866	0.237146	1.22263	0.289992	Ovis aries	9940	Welch one-way test	Y	N	N	N	N	N	N
Cathepsin H	W5PZ47	CTSH	150190	1.40322	Up	0.100771	0.26016	1.10608	Up	0.519165	0.846103	1.55207	Up	0.023287	0.244671	150226	210801	233162	1.40322	0.488743	1.10608	0.145451	1.55207	0.634194	Ovis aries	9940	Welch one-way test	N	N	N	N	N	N	N
Core histone macro-H2A	W5PZ59	H2AFY	377630	1.06552	Up	0.327276	0.529812	1.01607	Up	0.790003	0.943225	1.08265	Up	0.331648	0.639029	391033	416654	423350	1.06552	0.0915591	1.01607	0.0230031	1.08265	0.114562	Ovis aries	9940	Welch one-way test	N	N	N	N	N	N	N
Proteasome endopeptidase complex	W5PZ65	PSMA7	458101	1.09637	Up	0.044359	0.1653	1.02222	Down	0.637156	0.870881	1.07254	Up	0.245862	0.567146	455254	499126	488278	1.09637	0.132732	0.978267	-0.0316995	1.07254	0.101033	Ovis aries	9940	Welch one-way test	N	N	Y	Y	Y	Y	Y
Aconitase 1	W5PZ94	ACO1	2.19128e+06	1.11846	Down	0.071478	0.206841	1.05903	Up	0.146819	0.607262	1.05612	Down	0.417866	0.705402	2.16815e+06	1.93851e+06	2.05293e+06	0.894087	-0.161513	1.05903	0.0827381	0.946861	-0.078775	Ovis aries	9940	Welch one-way test	N	N	N	N	Y	Y	Y
Electron transfer flavoprotein subunit beta	W5PZB6	ETFB	4.46656e+06	1.10278	Down	0.11318	0.284752	1.06211	Up	0.303013	0.721265	1.03829	Down	0.587376	0.808188	4712393	4.27318e+06	4.5386e+06	0.906797	-0.141149	1.06211	0.0869369	0.96312	-0.0542118	Ovis aries	9940	Welch one-way test	N	N	N	N	N	N	N
Aldehyde dehydrogenase 8 family member A1	W5PZD2	ALDH8A1	1.22715e+06	1.21164	Down	0.271145	0.484626	1.21791	Up	0.18802	0.66908	1.00518	Up	0.966838	0.988563	1384667	1.1428e+06	1.39183e+06	0.825328	-0.276961	1.21791	0.284408	1.00518	0.00744747	Ovis aries	9940	Welch one-way test	Y	N	N	N	Y	Y	Y
Uncharacterized protein	W5PZE4	NA	521699	1.34193	Down	0.086423	0.234619	1.22558	Up	0.238016	0.700719	1.09494	Down	0.580685	0.804809	484822	361287	442784	0.745195	-0.424311	1.22558	0.293461	0.913293	-0.13085	Ovis aries	9940	Welch one-way test	N	N	N	N	N	N	N
Adducin 1	W5PZG0	ADD1	516326	1.14606	Down	0.003458	0.0502603	1.0638	Up	0.081594	0.537161	1.07733	Down	0.048016	0.303461	520325	454011	482978	0.872553	-0.196685	1.0638	0.0892311	0.928225	-0.107454	Ovis aries	9940	Welch one-way test	N	N	Y	N	N	Y	Y
Clusterin	W5PZI1	LOC101113728	721755	1.93216	Up	0.001478	0.0324339	1.24968	Down	0.111907	0.570421	1.54612	Up	0.027162	0.251907	706208	1.36451e+06	1.09188e+06	1.93216	0.950216	0.800203	-0.321563	1.54612	0.628653	Ovis aries	9940	Welch one-way test	N	N	N	N	N	N	N
Annexin	W5PZM9	ANXA5	3.29614e+06	1.06451	Down	0.649277	0.784295	1.06121	Up	0.633514	0.870393	1.00311	Down	0.972271	0.988563	3.14109e+06	2.95073e+06	3131342	0.939397	-0.0901925	1.06121	0.0857079	0.996896	-0.00448456	Ovis aries	9940	Welch one-way test	N	N	Y	Y	Y	Y	Y
Uncharacterized protein	W5PZN3	NA	241961	1.05116	Down	0.461772	0.64911	1.08236	Up	0.08771	0.558798	1.02968	Up	0.555574	0.797916	232974	221636	239889	0.951334	-0.0719754	1.08236	0.114174	1.02968	0.0421986	Ovis aries	9940	Welch one-way test	N	N	N	N	N	N	N
Mitochondrial fission 1 protein	W5PZP9	FIS1	417839	1.06816	Down	0.232144	0.449495	1.0112	Up	0.821666	0.946015	1.05633	Down	0.284989	0.606157	425853	398679	403144	0.936191	-0.0951255	1.0112	0.0160648	0.946674	-0.0790607	Ovis aries	9940	Welch one-way test	N	N	N	N	N	N	N
Oxoglutarate dehydrogenase	W5PZR4	OGDH	1.64521e+06	1.04683	Up	0.487315	0.664834	1.04926	Up	0.356199	0.758483	1.0984	Up	0.202954	0.538032	1.70943e+06	1.78948e+06	1877638	1.04683	0.0660266	1.04926	0.0693776	1.0984	0.135404	Ovis aries	9940	Welch one-way test	N	N	Y	Y	N	Y	Y
Uncharacterized protein	W5PZU9	LOC101106720	459689	1.54513	Up	0.007179	0.0763363	1.03017	Down	0.785057	0.942146	1.49987	Up	0.022656	0.244671	495447	765530	743107	1.54513	0.627728	0.97071	-0.0428882	1.49987	0.58484	Ovis aries	9940	Welch one-way test	N	N	N	N	N	N	N
Cysteine and glycine rich protein 2	W5PZX1	CSRP2	122325	1.12147	Up	0.195337	0.401865	1.23386	Down	0.039313	0.41198	1.10022	Down	0.481657	0.747562	128165	143732	116490	1.12147	0.165386	0.810464	-0.303179	0.908909	-0.137793	Ovis aries	9940	Welch one-way test	N	N	N	N	N	N	N
Ribosomal protein L32	W5Q000	RPL32	68003.7	1.18017	Up	0.13625	0.316581	1.33102	Down	0.009046	0.259038	1.12782	Down	0.302044	0.623023	67116.8	79209.2	59510.1	1.18017	0.238994	0.751303	-0.412533	0.886665	-0.173539	Ovis aries	9940	Welch one-way test	N	N	N	N	N	N	N
X-prolyl aminopeptidase 2	W5Q009	XPNPEP2	245288	1.11413	Up	0.612881	0.754972	1.14235	Down	0.461903	0.843412	1.02532	Down	0.851185	0.935238	242530	270211	236540	1.11413	0.155922	0.875391	-0.192001	0.975302	-0.0360784	Ovis aries	9940	Welch one-way test	Y	N	N	N	N	N	N
AHNAK nucleoprotein	W5Q038	AHNAK	459160	1.11055	Up	0.269871	0.484541	1.0369	Up	0.624435	0.867498	1.15154	Up	0.090328	0.386348	454878	505167	523808	1.11055	0.15128	1.0369	0.052278	1.15154	0.203558	Ovis aries	9940	Welch one-way test	N	N	N	N	N	N	N
Cytochrome c1	W5Q0A9	CYC1	871123	1.05542	Down	0.47755	0.658402	1.06787	Up	0.374608	0.77269	1.0118	Up	0.867911	0.944421	892081	845240	902610	0.947493	-0.0778135	1.06787	0.0947418	1.0118	0.0169284	Ovis aries	9940	Welch one-way test	N	N	Y	Y	N	Y	Y
Protein phosphatase 2 scaffold subunit Aalpha	W5Q0B5	PPP2R1A	67001.2	1.1381	Up	0.058924	0.188649	1.01199	Down	0.894916	0.967839	1.12461	Up	0.345794	0.653534	65186	74188.1	73309	1.1381	0.186626	0.98815	-0.0171975	1.12461	0.169428	Ovis aries	9940	Welch one-way test	N	N	N	N	N	N	N
Methionine sulfoxide reductase A	W5Q0D6	MSRA	432012	1.10675	Down	0.369565	0.572463	1.03149	Up	0.676472	0.894047	1.07296	Down	0.474895	0.741437	422193	381470	393484	0.903543	-0.146334	1.03149	0.0447361	0.932	-0.101598	Ovis aries	9940	Welch one-way test	N	N	Y	N	Y	Y	Y
Protein lin-7 homolog	W5Q0E7	LIN7C	161635	1.06066	Down	0.472177	0.654288	1.08814	Down	0.299615	0.721265	1.15414	Down	0.100049	0.397179	162799	153489	141057	0.942813	-0.0849557	0.919003	-0.121859	0.866448	-0.206815	Ovis aries	9940	Welch one-way test	N	N	N	N	N	N	N
Ubiquinol-cytochrome c reductase core protein 2	W5Q0F9	UQCRC2	1.89719e+06	1.09513	Down	0.24694	0.462281	1.10187	Up	0.084973	0.545922	1.00616	Up	0.935011	0.974484	2.01455e+06	1.83955e+06	2.02695e+06	0.913133	-0.131103	1.10187	0.139958	1.00616	0.00885474	Ovis aries	9940	Welch one-way test	N	N	N	N	N	N	N
Eukaryotic translation elongation factor 1 gamma	W5Q0L1	EEF1G	285936	1.21418	Up	0.004525	0.0569427	1.03329	Down	0.496894	0.846103	1.17506	Up	0.007951	0.150467	275194	334134	323368	1.21418	0.279979	0.967781	-0.0472476	1.17506	0.232731	Ovis aries	9940	Welch one-way test	N	N	N	N	N	N	N
Tyrosine 3-monooxygenase/tryptophan 5-monooxygenase activation protein theta	W5Q0Q1	YWHAQ	580866	1.21059	Up	0.130561	0.308394	1.42705	Down	0.000866	0.1185	1.1788	Down	0.293783	0.61562	654455	792277	555185	1.21059	0.275712	0.700746	-0.513037	0.848317	-0.237325	Ovis aries	9940	Welch one-way test	N	N	N	N	Y	Y	Y
ATP synthase-coupling factor 6, mitochondrial	W5Q0Q5	ATP5PF	516727	1.45124	Down	0.003401	0.0502603	1.11176	Up	0.245212	0.700719	1.30535	Down	0.044986	0.296976	571151	393561	437547	0.689067	-0.537283	1.11176	0.152851	0.76608	-0.384432	Ovis aries	9940	Welch one-way test	N	N	N	N	N	N	N
Acyl-CoA synthetase short chain family member 3	W5Q0R0	ACSS3	1.31467e+06	1.06352	Down	0.399526	0.600049	1.11073	Up	0.204268	0.678032	1.0444	Up	0.628869	0.83468	1.34295e+06	1.26274e+06	1402569	0.940277	-0.0888429	1.11073	0.151512	1.0444	0.0626688	Ovis aries	9940	Welch one-way test	N	N	N	N	N	N	N
Alpha-crystallin B chain	W5Q0R4	CRYAB	1.70641e+06	1.0752	Down	0.433501	0.628649	1.04178	Down	0.702357	0.899829	1.12013	Down	0.252561	0.567146	1.7074e+06	1.58798e+06	1524294	0.930058	-0.104607	0.959894	-0.059053	0.892757	-0.16366	Ovis aries	9940	Welch one-way test	N	N	N	N	N	N	N
2-hydroxyacyl-CoA lyase 1	W5Q0R8	HACL1	453969	1.32466	Down	0.089716	0.241074	1.15374	Up	0.213104	0.68715	1.14815	Down	0.401999	0.694922	496535	374839	432467	0.754909	-0.405626	1.15374	0.20632	0.870969	-0.199307	Ovis aries	9940	Welch one-way test	N	N	N	N	N	N	N
Lactoylglutathione lyase	W5Q0T3	GLO1	289129	1.06661	Down	0.346769	0.547895	1.00515	Up	0.907929	0.967839	1.06115	Down	0.318245	0.633284	284396	266635	268008	0.937547	-0.0930371	1.00515	0.00741313	0.942377	-0.0856239	Ovis aries	9940	Welch one-way test	N	N	N	N	N	N	N
SERPIN domain-containing protein	W5Q0X5	LOC101115576	295101	2.92328	Up	0.000875	0.0272696	1.47873	Down	0.031503	0.389784	1.97689	Up	0.002031	0.087058	294672	861412	582536	2.92328	1.54759	0.676258	-0.564354	1.97689	0.983236	Ovis aries	9940	Welch one-way test	N	N	N	N	N	N	N
Fumarylacetoacetase	W5Q0Y4	FAH	1.22753e+06	1.0589	Down	0.275383	0.486695	1.03977	Down	0.621922	0.867498	1.10101	Down	0.321831	0.633611	1.27027e+06	1.19962e+06	1.15373e+06	0.944377	-0.0825656	0.961749	-0.0562671	0.908254	-0.138833	Ovis aries	9940	Welch one-way test	N	N	Y	Y	Y	Y	Y
SERPIN domain-containing protein	W5Q124	LOC101119509	996663	3.58109	Up	0.001164	0.0303258	1.52959	Down	0.046841	0.440528	2.3412	Up	0.004035	0.113845	983275	3.52119e+06	2.30205e+06	3.58109	1.8404	0.653769	-0.613147	2.3412	1.22725	Ovis aries	9940	Welch one-way test	N	N	N	N	N	N	N
5-oxoprolinase, ATP-hydrolysing	W5Q173	OPLAH	68946.7	1.20107	Down	0.014334	0.0907754	1.12557	Up	0.111918	0.570421	1.06708	Down	0.370315	0.672526	67975.5	56595.6	63702.1	0.832588	-0.264325	1.12557	0.170651	0.937133	-0.0936739	Ovis aries	9940	Welch one-way test	N	N	N	N	N	N	N
Apoptosis inducing factor mitochondria associated 1	W5Q1F6	AIFM1	2.51083e+06	1.05879	Up	0.233599	0.449852	1.01614	Down	0.71041	0.90044	1.04197	Up	0.189743	0.53155	2.51139e+06	2.65904e+06	2.6168e+06	1.05879	0.0824226	0.984113	-0.0231046	1.04197	0.059318	Ovis aries	9940	Welch one-way test	Y	N	Y	N	N	Y	Y
Heat shock protein family D (Hsp60) member 1	W5Q1L2	HSPD1	6.26534e+06	1.06793	Up	0.198732	0.406731	1.04272	Down	0.472374	0.844288	1.02418	Up	0.757816	0.901618	6.37639e+06	6.80955e+06	6.53057e+06	1.06793	0.0948187	0.959031	-0.0603509	1.02418	0.0344678	Ovis aries	9940	Welch one-way test	N	N	Y	Y	N	Y	Y
DEAD-box helicase 17	W5Q1M9	DDX17	370294	1.21076	Up	0.015915	0.095976	1.09028	Down	0.134289	0.594548	1.1105	Up	0.16574	0.494093	363161	439700	403289	1.21076	0.275909	0.917192	-0.124705	1.1105	0.151204	Ovis aries	9940	Welch one-way test	N	N	N	N	N	N	N
Uncharacterized protein	W5Q1T4	NA	9.0189e+06	1.05194	Up	0.416574	0.620931	1.00618	Up	0.93708	0.973233	1.05845	Up	0.541388	0.783327	9.21963e+06	9.69854e+06	9.75848e+06	1.05194	0.0730588	1.00618	0.00888967	1.05845	0.0819485	Ovis aries	9940	Welch one-way test	N	N	N	N	N	N	N
Succinate dehydrogenase [ubiquinone] flavoprotein subunit, mitochondrial	W5Q216	NA	1.94344e+06	1.03914	Up	0.56008	0.718284	1.00442	Up	0.922497	0.969632	1.04373	Up	0.563106	0.801538	2.11075e+06	2.19336e+06	2.20305e+06	1.03914	0.0553856	1.00442	0.0063648	1.04373	0.0617504	Ovis aries	9940	Welch one-way test	N	N	N	N	N	N	N
Dihydropyrimidinase	W5Q252	DPYS	742303	1.07782	Up	0.25287	0.470041	1.01325	Up	0.863038	0.964356	1.0921	Up	0.362911	0.666743	721485	777633	787936	1.07782	0.10812	1.01325	0.0189896	1.0921	0.12711	Ovis aries	9940	Welch one-way test	Y	N	N	N	Y	Y	Y
Protein disulfide isomerase family A member 6	W5Q282	PDIA6	513960	1.16473	Down	0.326583	0.529812	1.04188	Down	0.720514	0.90044	1.21351	Down	0.177827	0.514643	612885	526205	505051	0.858571	-0.219991	0.9598	-0.0591942	0.824056	-0.279185	Ovis aries	9940	Welch one-way test	N	N	N	N	N	N	N
Acetyltransferase component of pyruvate dehydrogenase complex	W5Q2C5	NA	591640	1.09933	Up	0.282905	0.49228	1.05146	Up	0.507238	0.846103	1.1559	Up	0.047535	0.302844	585892	644087	677229	1.09933	0.136623	1.05146	0.0723881	1.1559	0.209011	Ovis aries	9940	Welch one-way test	N	N	N	N	N	N	N
Lumican	W5Q2E1	LUM	472180	1.44621	Up	0.021171	0.111796	1.06887	Up	0.555052	0.850458	1.54581	Up	0.023538	0.244671	527900	763456	816034	1.44621	0.53228	1.06887	0.0960842	1.54581	0.628364	Ovis aries	9940	Welch one-way test	N	N	Y	Y	Y	Y	Y
PKS_ER domain-containing protein	W5Q2E8	NA	773497	1.06881	Up	0.527645	0.699675	1.06465	Down	0.513214	0.846103	1.0039	Up	0.973547	0.988563	827608	884554	830840	1.06881	0.0960024	0.939275	-0.0903799	1.0039	0.00562256	Ovis aries	9940	Welch one-way test	N	N	N	N	N	N	N
S-(hydroxymethyl)glutathione dehydrogenase	W5Q2F4	ADH5	268412	1.02404	Down	0.805283	0.878693	1.05604	Down	0.555489	0.850458	1.08143	Down	0.202932	0.538032	272280	265887	251778	0.97652	-0.0342788	0.946936	-0.078661	0.924702	-0.11294	Ovis aries	9940	Welch one-way test	N	N	N	N	Y	Y	Y
Decorin	W5Q2F5	DCN	81189.8	1.033	Down	0.829735	0.890588	1.03861	Up	0.795786	0.945292	1.00543	Up	0.974983	0.98875	86897.2	84120.9	87368.8	0.968051	-0.0468454	1.03861	0.0546539	1.00543	0.00780848	Ovis aries	9940	Welch one-way test	N	N	N	N	N	N	N
Leucine zipper and EF-hand containing transmembrane protein 1	W5Q2P3	LETM1	285275	1.01902	Up	0.732069	0.836237	1.1868	Up	0.012786	0.306472	1.20938	Up	0.012643	0.186601	278100	283391	336328	1.01902	0.0271871	1.1868	0.247076	1.20938	0.274263	Ovis aries	9940	Welch one-way test	N	N	Y	Y	N	Y	Y
UBIQUITIN_CONJUGAT_2 domain-containing protein	W5Q2R9	NA	697830	1.12183	Up	0.046564	0.169519	1.02188	Down	0.632988	0.870393	1.09781	Up	0.132018	0.436377	738270	828212	810478	1.12183	0.165852	0.978586	-0.0312288	1.09781	0.134623	Ovis aries	9940	Welch one-way test	N	N	N	N	N	N	N
Plectin	W5Q2U7	PLEC	133655	1.24847	Up	0.014485	0.0907754	1.06632	Up	0.360951	0.760403	1.33128	Up	0.001938	0.087058	136574	170509	181818	1.24847	0.320164	1.06632	0.0926449	1.33128	0.412809	Ovis aries	9940	Welch one-way test	N	N	N	N	N	N	N
Ubiquitin conjugating enzyme E2 L3	W5Q399	UBE2L3	105114	1.00127	Up	0.983976	0.984843	1.00387	Up	0.951779	0.980007	1.00514	Up	0.929945	0.97246	104862	104995	105401	1.00127	0.00183004	1.00387	0.00557205	1.00514	0.00740208	Ovis aries	9940	Welch one-way test	N	N	N	N	N	N	N
Aldehyde oxidase 1	W5Q3F9	AOX1	298437	1.03218	Up	0.692473	0.82017	1.04655	Down	0.619322	0.867498	1.01392	Down	0.899399	0.953454	317628	327849	313267	1.03218	0.0456916	0.955523	-0.0656378	0.986269	-0.0199462	Ovis aries	9940	Welch one-way test	N	N	Y	Y	Y	Y	Y
Cathepsin Z	W5Q3N1	CTSZ	234592	1.02453	Down	0.835795	0.893475	1.07787	Up	0.575053	0.858775	1.05206	Up	0.683227	0.864225	241794	236005	254382	0.976058	-0.034961	1.07787	0.108181	1.05206	0.0732198	Ovis aries	9940	Welch one-way test	N	N	Y	Y	Y	Y	Y
Cell division cycle 37	W5Q3Q7	CDC37	126033	1.01212	Up	0.845045	0.896088	1.10405	Down	0.169364	0.631764	1.09083	Down	0.177845	0.514643	126985	128524	116411	1.01212	0.0173763	0.905755	-0.142807	0.916731	-0.12543	Ovis aries	9940	Welch one-way test	N	N	N	N	N	N	N
Calcium-transporting ATPase	W5Q3Y9	ATP2A2	151839	1.30104	Up	0.033857	0.136464	1.2594	Down	0.029541	0.389784	1.03307	Up	0.648775	0.845857	146488	190588	151332	1.30104	0.379669	0.794029	-0.332736	1.03307	0.0469335	Ovis aries	9940	Welch one-way test	N	N	N	N	N	N	N
3-hydroxyisobutyryl-CoA hydrolase, mitochondrial	W5Q437	HIBCH	978317	1.03856	Up	0.592806	0.744542	1.03177	Up	0.651937	0.877545	1.07156	Up	0.362095	0.666743	926707	962440	993017	1.03856	0.0545837	1.03177	0.0451225	1.07156	0.0997062	Ovis aries	9940	Welch one-way test	N	N	N	N	N	N	N
6-phosphogluconolactonase	W5Q4B6	PGLS	309340	1.0742	Down	0.378522	0.578702	1.18375	Up	0.045352	0.440528	1.10198	Up	0.12	0.421136	312778	291172	344675	0.930925	-0.103264	1.18375	0.243365	1.10198	0.140101	Ovis aries	9940	Welch one-way test	N	N	N	N	N	N	N
Heat shock protein 90 beta family member 1	W5Q4E1	HSP90B1	2.91738e+06	1.38195	Up	0.002272	0.0437776	1.17255	Down	0.030082	0.389784	1.17859	Up	0.019318	0.227799	2.94151e+06	4.06502e+06	3.46683e+06	1.38195	0.466709	0.852843	-0.229648	1.17859	0.237061	Ovis aries	9940	Welch one-way test	N	N	Y	Y	Y	Y	Y
Transporter	W5Q4L8	SLC6A19	77386	1.12647	Down	0.348957	0.548692	1.17417	Up	0.095065	0.563589	1.04235	Up	0.684816	0.864225	77883.4	69139.1	81181.4	0.887726	-0.171814	1.17417	0.231647	1.04235	0.0598334	Ovis aries	9940	Welch one-way test	N	N	N	N	N	N	N
Uncharacterized protein	W5Q4S3	RPL3	84021.5	1.16954	Up	0.070784	0.205586	1.20127	Down	0.020274	0.358133	1.02713	Down	0.64825	0.845857	84332.7	98630.5	82105.3	1.16954	0.225942	0.832453	-0.264558	0.973588	-0.0386168	Ovis aries	9940	Welch one-way test	N	N	N	N	N	N	N
Heat shock protein family A (Hsp70) member 9	W5Q4W8	HSPA9	4.19852e+06	1.09587	Up	0.210803	0.425919	1.01682	Down	0.773115	0.931038	1.07774	Up	0.094181	0.38764	4.19678e+06	4.59912e+06	4.52302e+06	1.09587	0.132075	0.983453	-0.0240714	1.07774	0.108003	Ovis aries	9940	Welch one-way test	N	N	N	N	N	N	N
Hydroxyacylglutathione hydrolase	W5Q540	HAGH	418860	1.59719	Down	3.8e-05	0.013825	1.03385	Up	0.621226	0.867498	1.54489	Down	2.1e-05	0.008295	439315	275054	284366	0.626098	-0.67554	1.03385	0.048031	0.647293	-0.627509	Ovis aries	9940	Welch one-way test	N	N	N	N	N	N	N
Sidoreflexin	W5Q5A2	SFXN1	1.30935e+06	1.0192	Up	0.614128	0.754972	1.02446	Up	0.609083	0.867498	1.04413	Up	0.389247	0.682663	1.29889e+06	1.32382e+06	1.3562e+06	1.0192	0.0274365	1.02446	0.0348598	1.04413	0.0622963	Ovis aries	9940	Welch one-way test	N	N	N	N	N	N	N
Fibrinogen gamma chain	W5Q5A6	FGG	460102	1.45328	Up	0.298027	0.507557	1.33486	Down	0.335426	0.740399	1.08871	Up	0.62102	0.833613	466529	677997	507915	1.45328	0.539311	0.749141	-0.416692	1.08871	0.122619	Ovis aries	9940	Welch one-way test	N	Y	Y	Y	Y	Y	Y
Catenin alpha 1	W5Q5C7	CTNNA1	124705	1.02517	Down	0.663696	0.794424	1.02491	Down	0.697923	0.899183	1.05071	Down	0.406745	0.69854	122616	119606	116698	0.975452	-0.0358576	0.975693	-0.0355014	0.951741	-0.071359	Ovis aries	9940	Welch one-way test	N	N	N	N	N	N	N
Acyl-CoA thioesterase 9	W5Q5F5	ACOT9	84188.5	1.12655	Up	0.454892	0.646339	1.06462	Down	0.693871	0.899183	1.05816	Up	0.822354	0.920021	79169.3	89188	83774.1	1.12655	0.171909	0.939298	-0.0903453	1.05816	0.0815632	Ovis aries	9940	Welch one-way test	N	N	N	N	N	N	N
Ubiquinol-cytochrome c reductase core protein 1	W5Q5G6	UQCRC1	2.15649e+06	1.13588	Down	0.06147	0.189693	1.08611	Up	0.15267	0.611998	1.04583	Down	0.566267	0.803783	2.15236e+06	1.89488e+06	2.05805e+06	0.880374	-0.183812	1.08611	0.11917	0.956183	-0.0646416	Ovis aries	9940	Welch one-way test	N	N	N	N	N	N	N
Transketolase	W5Q5G8	TKT	2.31904e+06	1.10335	Up	0.291246	0.502368	1.09387	Down	0.154844	0.611998	1.00867	Up	0.9319	0.972524	2.32234e+06	2.56236e+06	2.34247e+06	1.10335	0.141896	0.914185	-0.129442	1.00867	0.0124543	Ovis aries	9940	Welch one-way test	N	N	Y	Y	Y	Y	Y
Fibrinogen alpha chain	W5Q5H8	FGA	1.00694e+06	1.57553	Up	0.183434	0.386434	1.29205	Down	0.345369	0.75163	1.21941	Up	0.286005	0.606157	971094	1.52999e+06	1.18416e+06	1.57553	0.65584	0.773966	-0.369658	1.21941	0.286182	Ovis aries	9940	Welch one-way test	N	Y	Y	Y	Y	Y	Y
Ribosomal protein	W5Q5K4	LOC101106166	60997.7	1.08379	Up	0.393637	0.594595	1.01364	Down	0.849158	0.958267	1.06921	Up	0.200748	0.53578	60144.2	65183.8	64306.5	1.08379	0.116088	0.986541	-0.0195489	1.06921	0.096539	Ovis aries	9940	Welch one-way test	N	N	N	N	N	N	N
Actin-related protein 2/3 complex subunit 3	W5Q5K9	ARPC3	18545.3	1.82503	Up	0.000737	0.0272696	1.12382	Down	0.253905	0.700719	1.62396	Up	0.007687	0.150467	20416.5	37260.8	33155.6	1.82503	0.867923	0.889825	-0.168406	1.62396	0.699517	Ovis aries	9940	Welch one-way test	N	N	N	N	N	N	N
Keratin 8	W5Q5N9	KRT8	1.21446e+06	1.08663	Up	0.515739	0.692209	1.09825	Up	0.358957	0.75952	1.19339	Up	0.09243	0.386348	1.26131e+06	1.37057e+06	1.50524e+06	1.08663	0.119859	1.09825	0.135212	1.19339	0.255071	Ovis aries	9940	Welch one-way test	N	N	Y	Y	N	Y	Y
Aspartoacylase	W5Q5Q7	ASPA	2.72944e+06	1.13048	Down	0.279155	0.490072	1.08944	Up	0.336337	0.740399	1.03767	Down	0.622118	0.833613	2.86808e+06	2.53704e+06	2.76396e+06	0.884579	-0.176936	1.08944	0.12359	0.963699	-0.0533459	Ovis aries	9940	Welch one-way test	Y	N	Y	N	N	Y	Y
Uncharacterized protein	W5Q5S5	HNRNPUL2	1.33473e+06	1.06867	Down	0.420755	0.622465	1.00934	Up	0.909126	0.967839	1.05879	Down	0.473059	0.740033	1.33161e+06	1246044	1.25768e+06	0.935741	-0.0958195	1.00934	0.0134055	0.944476	-0.082414	Ovis aries	9940	Welch one-way test	N	N	N	N	N	N	N
Plasmalemma vesicle associated protein	W5Q5T2	PLVAP	99534.2	1.04468	Down	0.510522	0.688246	1.14626	Up	0.02188	0.358133	1.09724	Up	0.060846	0.345733	97833	93649.1	107346	0.957234	-0.0630561	1.14626	0.196937	1.09724	0.133881	Ovis aries	9940	Welch one-way test	N	N	N	N	N	N	N
ATP synthase subunit	W5Q5U7	NA	875691	1.00279	Down	0.959418	0.970474	1.05416	Up	0.318036	0.740399	1.05122	Up	0.424626	0.706971	857100	854712	900999	0.997214	-0.00402533	1.05416	0.0760881	1.05122	0.0720628	Ovis aries	9940	Welch one-way test	N	N	N	N	N	N	N
NADH:ubiquinone oxidoreductase subunit B10	W5Q5Y9	NDUFB10	581114	1.00777	Down	0.926733	0.947114	1.01655	Down	0.815803	0.946015	1.02445	Down	0.798631	0.912731	638449	633528	623213	0.992293	-0.0111619	0.983718	-0.023684	0.976136	-0.0348458	Ovis aries	9940	Welch one-way test	N	N	N	N	N	N	N
MICOS complex subunit	W5Q5Z6	APOO	262443	1.01258	Up	0.88334	0.923067	1.02549	Up	0.720187	0.90044	1.0384	Up	0.419868	0.706971	265334	268673	275522	1.01258	0.0180407	1.02549	0.0363183	1.0384	0.0543591	Ovis aries	9940	Welch one-way test	N	Y	N	N	N	N	Y
Biliverdin reductase A	W5Q633	BLVRA	467664	1.14514	Up	0.242364	0.456963	1.25844	Down	0.046421	0.440528	1.09894	Down	0.28314	0.606157	476949	546173	434007	1.14514	0.195522	0.794632	-0.33164	0.909964	-0.136119	Ovis aries	9940	Welch one-way test	N	N	Y	Y	N	Y	Y
Uncharacterized protein	W5Q648	MATR3	112804	1.06833	Down	0.254765	0.470818	1.0359	Down	0.495249	0.846103	1.10669	Down	0.028079	0.251907	109264	102275	98730.8	0.936037	-0.0953633	0.965346	-0.0508814	0.903599	-0.146245	Ovis aries	9940	Welch one-way test	N	N	N	N	N	N	N
Ribosomal protein S2	W5Q675	RPS2	427301	1.19307	Up	0.025389	0.119995	1.12601	Down	0.064924	0.50642	1.05955	Up	0.407792	0.698819	438401	523042	464508	1.19307	0.254678	0.88809	-0.171223	1.05955	0.0834546	Ovis aries	9940	Welch one-way test	N	N	N	N	N	N	N
Non-POU domain containing octamer binding	W5Q681	NONO	82533.5	1.06093	Up	0.358072	0.559045	1.0897	Down	0.190133	0.669196	1.02712	Down	0.667084	0.854587	82877.6	87927	80689.3	1.06093	0.085324	0.917685	-0.123929	0.973596	-0.0386049	Ovis aries	9940	Welch one-way test	N	N	N	N	N	N	N
Tripeptidyl peptidase 1	W5Q689	TPP1	456809	1.457	Up	0.001477	0.0324339	1.0514	Down	0.589908	0.864689	1.38577	Up	0.029958	0.252195	450349	656161	624081	1.457	0.543005	0.95111	-0.0723166	1.38577	0.470688	Ovis aries	9940	Welch one-way test	N	N	N	N	Y	Y	Y
Isochorismatase domain containing 1	W5Q691	ISOC1	307207	1.05431	Down	0.139689	0.319176	1.15283	Up	0.017035	0.340411	1.09344	Up	0.157805	0.479779	305003	289291	333503	0.948486	-0.0763019	1.15283	0.205175	1.09344	0.128873	Ovis aries	9940	Welch one-way test	N	N	N	N	N	N	N
Interleukin enhancer binding factor 3	W5Q697	ILF3	97182.8	1.08339	Up	0.280292	0.490977	1.02145	Down	0.744115	0.908579	1.06065	Up	0.436254	0.712454	96505.9	104554	102359	1.08339	0.115559	0.979002	-0.0306159	1.06065	0.0849433	Ovis aries	9940	Welch one-way test	N	N	Y	N	N	Y	Y
Uncharacterized protein	W5Q6E1	LOC114115573	817496	1.36046	Down	0.076935	0.215511	1.00314	Up	0.952915	0.980007	1.3562	Down	0.112056	0.413665	1.05084e+06	772416	774842	0.735048	-0.44409	1.00314	0.00452467	0.737357	-0.439565	Ovis aries	9940	Welch one-way test	N	N	N	N	N	N	N
Plastin 3	W5Q6H1	PLS3	224167	1.11696	Down	0.014593	0.0907754	1.03111	Up	0.501435	0.846103	1.08326	Down	0.117582	0.420316	227705	203862	210204	0.895287	-0.159577	1.03111	0.0442021	0.923142	-0.115375	Ovis aries	9940	Welch one-way test	N	N	Y	Y	Y	Y	Y
Thioredoxin domain containing 5	W5Q6N7	TXNDC5	53270.5	1.25582	Up	0.02634	0.121688	1.09733	Down	0.361936	0.760451	1.14443	Up	0.323945	0.633611	57352.1	72023.7	65635.2	1.25582	0.328625	0.9113	-0.134002	1.14443	0.194623	Ovis aries	9940	Welch one-way test	N	N	N	N	N	N	N
VAMP associated protein B and C	W5Q6Q7	VAPB	352987	1.00566	Down	0.926507	0.947114	1.04029	Up	0.393374	0.788745	1.03444	Up	0.400412	0.693696	341404	339484	353161	0.994377	-0.00813552	1.04029	0.0569791	1.03444	0.0488436	Ovis aries	9940	Welch one-way test	N	N	N	N	N	N	N
Dimethylglycine dehydrogenase	W5Q6Y2	DMGDH	1.17622e+06	1.56099	Down	0.007348	0.0763363	1.34803	Up	0.095093	0.563589	1.15798	Down	0.42703	0.706971	1137834	728920	982606	0.640621	-0.642458	1.34803	0.430852	0.863576	-0.211605	Ovis aries	9940	Welch one-way test	Y	N	Y	Y	N	Y	Y
Solute carrier family 25 member 1	W5Q718	SLC25A1	658387	1.0488	Down	0.456391	0.647305	1.02709	Up	0.616925	0.867498	1.02114	Down	0.688597	0.865396	630091	600774	617047	0.953472	-0.068738	1.02709	0.0385571	0.979297	-0.030181	Ovis aries	9940	Welch one-way test	N	N	N	N	N	N	N
Protein-serine/threonine kinase	W5Q734	PDK3	61462.2	1.15615	Up	0.029892	0.12883	1.08721	Down	0.104573	0.568621	1.06341	Up	0.258289	0.578041	60668.3	70141.9	64515.5	1.15615	0.209334	0.919785	-0.120631	1.06341	0.0887029	Ovis aries	9940	Welch one-way test	N	N	N	N	N	N	N
ATP binding cassette subfamily D member 3	W5Q740	ABCD3	667987	1.03356	Up	0.780852	0.866315	1.00885	Down	0.912658	0.967839	1.02449	Up	0.801653	0.912731	709237	733038	726606	1.03356	0.04762	0.991226	-0.0127145	1.02449	0.0349055	Ovis aries	9940	Welch one-way test	N	N	N	N	N	N	N
Keratin 17	W5Q744	KRT17	66494.8	1.09898	Up	0.611666	0.754972	1.15929	Up	0.415083	0.80175	1.27404	Up	0.224862	0.552762	74149.9	81489.3	94469.8	1.09898	0.136166	1.15929	0.213243	1.27404	0.349408	Ovis aries	9940	Welch one-way test	N	N	N	N	N	N	N
Proteasome subunit alpha type	W5Q7C7	PSMA2	103228	1.08326	Up	0.240741	0.455994	1.07098	Down	0.286128	0.718209	1.01147	Up	0.833761	0.9251	102475	111007	103650	1.08326	0.115379	0.933726	-0.0989295	1.01147	0.0164496	Ovis aries	9940	Welch one-way test	N	N	N	N	N	N	N
Ig-like domain-containing protein	W5Q7I2	NA	4.80235e+06	1.2381	Up	0.147054	0.330036	1.13591	Up	0.251225	0.700719	1.40637	Up	0.009982	0.164287	4.59456e+06	5.68851e+06	6.46165e+06	1.2381	0.308123	1.13591	0.183852	1.40637	0.491975	Ovis aries	9940	Welch one-way test	N	N	N	N	N	N	N
Heterogeneous nuclear ribonucleoprotein A3	W5Q7M7	HNRNPA3	510457	1.01947	Up	0.78891	0.870106	1.00756	Up	0.937507	0.973233	1.02718	Up	0.819368	0.920021	516993	527060	531042	1.01947	0.0278222	1.00756	0.0108612	1.02718	0.0386834	Ovis aries	9940	Welch one-way test	N	N	N	N	N	N	N
PDZ and LIM domain 5	W5Q7N3	PDLIM5	147578	1.22222	Up	0.042909	0.162192	1.08485	Down	0.247439	0.700719	1.12662	Up	0.10399	0.404636	153582	187711	173030	1.22222	0.289499	0.921788	-0.117494	1.12662	0.172006	Ovis aries	9940	Welch one-way test	N	N	N	N	N	N	N
D-amino acid oxidase	W5Q7P0	DAO	3.3799e+06	1.13997	Up	0.347866	0.548531	1.0831	Down	0.523697	0.846103	1.05251	Up	0.67243	0.855995	3389673	3.86412e+06	3.56765e+06	1.13997	0.188993	0.923277	-0.115165	1.05251	0.0738283	Ovis aries	9940	Welch one-way test	Y	N	N	N	N	N	N
Heat shock protein family A (Hsp70) member 12A	W5Q7Q4	HSPA12A	888310	1.04004	Up	0.485867	0.664834	1.06042	Down	0.311151	0.729668	1.0196	Down	0.74137	0.888744	911906	948422	894380	1.04004	0.0566442	0.943019	-0.0846407	0.980781	-0.0279965	Ovis aries	9940	Welch one-way test	N	N	N	N	N	N	N
Epoxide hydrolase	W5Q7Q6	EPHX1	981348	1.19977	Down	0.096938	0.25358	1.14944	Up	0.163333	0.623398	1.04379	Down	0.661746	0.851432	973265	811209	932436	0.833492	-0.262759	1.14944	0.200931	0.95805	-0.0618275	Ovis aries	9940	Welch one-way test	N	N	N	N	N	N	N
Phosphoenolpyruvate carboxykinase 1	W5Q7T9	PCK1	815727	1.18429	Down	0.082353	0.225899	1.02976	Up	0.717941	0.90044	1.15007	Down	0.035784	0.26578	784324	662273	681982	0.844386	-0.244025	1.02976	0.0423076	0.869515	-0.201717	Ovis aries	9940	Welch one-way test	N	N	N	N	N	N	N
Dihydropyrimidine dehydrogenase [NADP(+)]	W5Q7Y9	DPYD	1.48589e+06	1.54872	Up	0.115806	0.287694	1.06009	Down	0.766267	0.925613	1.46093	Up	0.024944	0.246322	1.38111e+06	2.13895e+06	2.01772e+06	1.54872	0.631074	0.943319	-0.0841819	1.46093	0.546892	Ovis aries	9940	Welch one-way test	N	N	N	N	N	N	N
Destrin, actin depolymerizing factor	W5Q831	DSTN	256315	1.07438	Down	0.53169	0.699675	1.10384	Down	0.128939	0.590469	1.18595	Down	0.161284	0.486314	283783	264136	239288	0.930769	-0.103505	0.905927	-0.142533	0.843209	-0.246038	Ovis aries	9940	Welch one-way test	N	N	N	N	N	N	N
Integrin beta	W5Q883	ITGB1	761737	1.21052	Up	0.001391	0.0323203	1.07313	Down	0.192288	0.669196	1.12803	Up	0.077969	0.373306	777749	941477	877322	1.21052	0.275621	0.931857	-0.101819	1.12803	0.173802	Ovis aries	9940	Welch one-way test	N	N	Y	N	N	Y	Y
Glutathione S-transferase kappa	W5Q894	GSTK1	1.31147e+06	1.06604	Down	0.611614	0.754972	1.04675	Down	0.689072	0.899183	1.11588	Down	0.426367	0.706971	1.3808e+06	1.29526e+06	1.23741e+06	0.93805	-0.092263	0.955338	-0.0659167	0.896155	-0.15818	Ovis aries	9940	Welch one-way test	N	N	N	N	N	N	N
RAS like proto-oncogene A	W5Q8A7	RALA	541289	1.13241	Up	0.007837	0.0764594	1.00909	Down	0.829133	0.946588	1.12222	Up	0.028653	0.251907	533470	604109	598668	1.13241	0.179401	0.990994	-0.0130513	1.12222	0.16635	Ovis aries	9940	Welch one-way test	N	N	Y	N	N	Y	Y
Acyl-CoA_dh_1 domain-containing protein	W5Q8A9	NA	1.6493e+06	1.37136	Down	0.000802	0.0272696	1.1633	Up	0.038738	0.41198	1.17885	Down	0.028894	0.251907	1.59504e+06	1.1631e+06	1.35304e+06	0.729202	-0.455609	1.1633	0.218226	0.848282	-0.237383	Ovis aries	9940	Welch one-way test	N	N	N	N	N	N	N
ST13 Hsp70 interacting protein	W5Q8I4	ST13	1.63259e+06	1.16565	Up	0.027955	0.126197	1.06668	Down	0.26362	0.700719	1.09278	Up	0.121372	0.421136	1.67146e+06	1.94834e+06	1.82654e+06	1.16565	0.221136	0.937484	-0.0931341	1.09278	0.128002	Ovis aries	9940	Welch one-way test	N	N	N	N	Y	Y	Y
Ribosome binding protein 1	W5Q8J3	RRBP1	114996	1.14628	Up	0.214535	0.42989	1.10269	Down	0.327261	0.740399	1.03953	Up	0.561163	0.800214	116154	133144	120745	1.14628	0.196954	0.906874	-0.141026	1.03953	0.0559283	Ovis aries	9940	Welch one-way test	N	N	N	N	N	N	N
40S ribosomal protein S4	W5Q8J9	RPS4X	827596	1.06999	Down	0.413907	0.618122	1.03018	Down	0.461588	0.843412	1.10227	Down	0.316183	0.630995	944810	883011	857146	0.934592	-0.097592	0.970708	-0.0428913	0.907215	-0.140483	Ovis aries	9940	Welch one-way test	N	N	Y	N	N	Y	Y
Solute carrier family 3 member 2	W5Q8K4	SLC3A2	1.74593e+06	1.19227	Up	0.020454	0.109923	1.00738	Up	0.909532	0.967839	1.20107	Up	0.035838	0.26578	1.7034e+06	2.03092e+06	2.0459e+06	1.19227	0.253714	1.00738	0.0106012	1.20107	0.264316	Ovis aries	9940	Welch one-way test	N	N	Y	N	Y	Y	Y
Carbonic anhydrase 4	W5Q8Z5	CA4	45397.9	1.55934	Up	0.017502	0.102419	1.2749	Down	0.181267	0.656885	1.22311	Up	0.374019	0.674824	48414.3	75494.3	59215.8	1.55934	0.640934	0.784374	-0.350386	1.22311	0.290549	Ovis aries	9940	Welch one-way test	N	N	N	N	N	N	N
Thioredoxin reductase 2	W5Q902	TXNRD2	323042	1.1246	Down	0.052013	0.181014	1.06576	Up	0.348851	0.752984	1.05521	Down	0.43029	0.709664	332336	295515	314948	0.889207	-0.169409	1.06576	0.0918822	0.947681	-0.0775271	Ovis aries	9940	Welch one-way test	N	N	N	N	N	N	N
Glycerol-3-phosphate dehydrogenase [NAD(+)]	W5Q983	GPD1	5.46722e+06	1.01772	Up	0.771628	0.858644	1.02967	Up	0.593971	0.866075	1.04791	Up	0.496886	0.762213	5230297	5.32297e+06	5.48088e+06	1.01772	0.0253398	1.02967	0.042176	1.04791	0.0675158	Ovis aries	9940	Welch one-way test	N	N	N	N	Y	Y	Y
Rho GDP dissociation inhibitor alpha	W5Q9B2	ARHGDIA	582657	1.18116	Up	0.02336	0.115252	1.06894	Down	0.282978	0.718209	1.10498	Up	0.085637	0.383351	567258	670024	626810	1.18116	0.240209	0.935503	-0.0961852	1.10498	0.144024	Ovis aries	9940	Welch one-way test	N	N	Y	N	Y	Y	Y
Nitrilase family member 2	W5Q9C4	NIT2	536012	1.0403	Up	0.578458	0.731501	1.02382	Down	0.555061	0.850458	1.0161	Up	0.802469	0.912731	538243	559933	546907	1.0403	0.056996	0.976736	-0.0339592	1.0161	0.0230368	Ovis aries	9940	Welch one-way test	N	N	N	N	Y	Y	Y
SMB domain-containing protein	W5Q9D5	NA	488885	1.23877	Up	0.320614	0.525488	1.07784	Up	0.699471	0.899183	1.33519	Up	0.155203	0.477083	501366	621075	669419	1.23877	0.308905	1.07784	0.108141	1.33519	0.417046	Ovis aries	9940	Welch one-way test	N	N	N	N	N	N	N
Translocase of outer mitochondrial membrane 70	W5Q9E1	TOMM70	402207	1.06001	Down	0.124915	0.302708	1.01405	Down	0.721893	0.90044	1.0749	Down	0.133644	0.438086	393711	371421	366276	0.943385	-0.0840813	0.986147	-0.0201258	0.930316	-0.104207	Ovis aries	9940	Welch one-way test	N	N	N	N	N	N	N
Signal sequence receptor subunit 1	W5Q9F1	SSR1	133461	1.12355	Up	0.205299	0.415862	1.0067	Down	0.929639	0.970531	1.11607	Up	0.320505	0.633611	142818	160462	159394	1.12355	0.168061	0.993342	-0.00963706	1.11607	0.158424	Ovis aries	9940	Welch one-way test	N	N	N	N	N	N	N
Enoyl-CoA delta isomerase 1	W5Q9G8	ECI1	676066	1.06748	Up	0.532808	0.699675	1.08159	Down	0.458273	0.843412	1.01321	Down	0.916991	0.964611	647395	691083	638953	1.06748	0.0942127	0.924567	-0.11315	0.986959	-0.0189378	Ovis aries	9940	Welch one-way test	N	N	N	N	N	N	N
Sorting nexin	W5Q9H8	SNX5	462505	1.16907	Up	0.023939	0.115456	1.03295	Down	0.525544	0.846634	1.13178	Up	0.064809	0.346873	454697	531574	514619	1.16907	0.225366	0.968104	-0.0467658	1.13178	0.1786	Ovis aries	9940	Welch one-way test	N	N	Y	Y	N	Y	Y
Aldehyde dehydrogenase	W5Q9M1	ALDH3A2	722195	1.17383	Down	0.118859	0.291611	1.07676	Down	0.27486	0.711462	1.26393	Down	0.042088	0.294244	679917	579230	537938	0.851912	-0.231223	0.928713	-0.106696	0.791182	-0.337919	Ovis aries	9940	Welch one-way test	N	N	N	N	N	N	N
Uncharacterized protein	W5Q9M9	GK	282103	1.43732	Up	0.009832	0.0800751	1.35471	Down	0.024185	0.360493	1.06098	Up	0.652038	0.84722	280827	403638	297952	1.43732	0.523378	0.738167	-0.43798	1.06098	0.0853977	Ovis aries	9940	Welch one-way test	Y	N	N	N	N	N	N
Cofilin-1	W5Q9P7	CFL1	197313	1.05656	Down	0.113919	0.285702	1.05212	Up	0.355862	0.758483	1.00422	Down	0.94824	0.98051	198142	187535	197309	0.946469	-0.0793727	1.05212	0.073297	0.995797	-0.00607578	Ovis aries	9940	Welch one-way test	N	N	N	N	N	N	N
Dihydrolipoamide acetyltransferase component of pyruvate dehydrogenase complex	W5Q9Q2	DBT	733623	1.035	Down	0.657968	0.789253	1.00037	Up	0.99639	0.998767	1.03461	Down	0.729798	0.878403	744701	719521	719789	0.966187	-0.0496251	1.00037	0.000537662	0.966548	-0.0490874	Ovis aries	9940	Welch one-way test	N	N	N	N	N	N	N
OCIA domain containing 2	W5Q9Q8	OCIAD2	392500	1.04347	Up	0.713037	0.833283	1.19666	Down	0.066134	0.50642	1.1468	Down	0.304176	0.624206	461226	481276	402184	1.04347	0.0613891	0.835662	-0.259009	0.871988	-0.197619	Ovis aries	9940	Welch one-way test	N	N	N	N	N	N	N
Lamin B1	W5Q9T3	LMNB1	350832	1.08186	Up	0.312164	0.520273	1.00844	Down	0.922991	0.969632	1.0728	Up	0.45799	0.727992	363607	393371	390077	1.08186	0.113511	0.991628	-0.0121291	1.0728	0.101382	Ovis aries	9940	Welch one-way test	N	N	Y	Y	Y	Y	Y
Uncharacterized protein	W5Q9Y3	SLC25A10	995530	1.11169	Down	0.230132	0.447649	1.09021	Up	0.198567	0.67146	1.0197	Down	0.68888	0.865396	1.0144e+06	912486	994800	0.899534	-0.15275	1.09021	0.124605	0.98068	-0.028145	Ovis aries	9940	Welch one-way test	N	N	N	N	N	N	N
Ribos_L4_asso_C domain-containing protein	W5Q9Z9	RPL4	605753	1.11653	Up	0.071755	0.206885	1.05552	Down	0.263871	0.700719	1.0578	Up	0.094702	0.38764	617564	689530	653263	1.11653	0.159025	0.947402	-0.0779511	1.0578	0.0810734	Ovis aries	9940	Welch one-way test	N	N	N	N	N	N	N
Histone H2B	W5QA51	HIST1H2BN	2.30123e+07	1.14096	Up	0.07221	0.20702	1.03196	Up	0.621255	0.867498	1.17742	Up	0.084162	0.383351	23777388	2.7129e+07	2.79959e+07	1.14096	0.190245	1.03196	0.0453819	1.17742	0.235627	Ovis aries	9940	Welch one-way test	N	N	N	N	N	N	N
Aconitate hydratase, mitochondrial	W5QAA9	ACO2	6.98055e+06	1.19975	Down	0.02253	0.114094	1.17521	Up	0.030239	0.389784	1.02088	Down	0.822107	0.920021	7.23096e+06	6.02708e+06	7.08309e+06	0.83351	-0.262728	1.17521	0.23292	0.979551	-0.0298081	Ovis aries	9940	Welch one-way test	N	N	N	N	Y	Y	Y
Hemopexin	W5QAB1	HPX	429057	2.08932	Up	0.007989	0.0764594	1.47184	Down	0.07549	0.531362	1.41953	Up	0.165437	0.494093	412902	862686	586129	2.08932	1.06303	0.679424	-0.557616	1.41953	0.505418	Ovis aries	9940	Welch one-way test	N	Y	Y	Y	Y	Y	Y
Serine--pyruvate aminotransferase	W5QAB6	AGXT	1.49928e+06	1.09618	Up	0.534056	0.699675	1.10016	Up	0.443043	0.831363	1.20597	Up	0.163101	0.489923	1658595	1.81812e+06	2.00022e+06	1.09618	0.132486	1.10016	0.137713	1.20597	0.270199	Ovis aries	9940	Welch one-way test	N	N	Y	Y	N	Y	Y
Aldehyde dehydrogenase 7 family member A1	W5QAE8	ALDH7A1	1.68105e+06	1.06165	Down	0.47248	0.654288	1.07789	Up	0.331071	0.740399	1.0153	Up	0.881302	0.950366	1.60588e+06	1.51263e+06	1630442	0.941934	-0.0863026	1.07789	0.108206	1.0153	0.0219029	Ovis aries	9940	Welch one-way test	N	N	N	N	Y	Y	Y
NADH dehydrogenase [ubiquinone] 1 alpha subcomplex subunit 2	W5QAH8	NDUFA2	518227	1.01939	Up	0.702208	0.826018	1.02816	Up	0.693121	0.899183	1.04809	Up	0.572492	0.804809	529647	539917	555119	1.01939	0.0277073	1.02816	0.0400599	1.04809	0.0677672	Ovis aries	9940	Welch one-way test	N	N	N	N	N	N	N
Protein kinase C substrate 80K-H	W5QAL0	PRKCSH	219968	1.15642	Up	0.021715	0.113443	1.20201	Down	0.003324	0.184123	1.03942	Down	0.463371	0.732796	216226	250048	208025	1.15642	0.209668	0.83194	-0.265448	0.962074	-0.0557797	Ovis aries	9940	Welch one-way test	N	N	Y	Y	Y	Y	Y
Actin gamma 1	W5QAX3	ACTG1	2.88315e+06	1.00551	Up	0.952885	0.965101	1.00942	Down	0.912652	0.967839	1.0039	Down	0.973309	0.988563	3.21152e+06	3.22921e+06	3.19906e+06	1.00551	0.00792382	0.990663	-0.0135335	0.996119	-0.00560967	Ovis aries	9940	Welch one-way test	N	N	N	N	N	N	N
Dehydrogenase/reductase 11	W5QAX4	DHRS11	280622	1.04095	Down	0.674643	0.805088	1.01101	Up	0.875312	0.967128	1.02962	Down	0.73052	0.878403	277881	266948	269886	0.960657	-0.0579069	1.01101	0.0157941	0.971232	-0.0421128	Ovis aries	9940	Welch one-way test	N	N	N	N	N	N	N
Uncharacterized protein	W5QAY5	RAB10	384634	1.1949	Up	0.018068	0.103433	1.00791	Down	0.881478	0.967839	1.18552	Up	0.018862	0.227799	389478	465385	461733	1.1949	0.256885	0.992152	-0.0113674	1.18552	0.245517	Ovis aries	9940	Welch one-way test	N	N	N	N	Y	Y	Y
Transglutaminase 2	W5QB02	TGM2	35672	1.88939	Up	0.010641	0.0832316	1.2289	Down	0.192264	0.669196	1.53747	Up	0.022049	0.244671	41500.6	78410.9	63806	1.88939	0.917922	0.813739	-0.297362	1.53747	0.62056	Ovis aries	9940	Welch one-way test	N	N	N	N	N	N	N
Serine hydroxymethyltransferase	W5QB21	SHMT1	3.14061e+06	1.14329	Up	0.101204	0.260427	1.04853	Up	0.546252	0.8504	1.19877	Up	0.108738	0.407123	3196460	3.65447e+06	3.83182e+06	1.14329	0.193188	1.04853	0.0683674	1.19877	0.261555	Ovis aries	9940	Welch one-way test	Y	N	N	N	Y	Y	Y
LRRcap domain-containing protein	W5QB24	ANP32A	318439	1.09037	Down	0.471574	0.654288	1.10435	Down	0.266691	0.701029	1.20416	Down	0.107193	0.405179	335586	307771	278690	0.917116	-0.124824	0.90551	-0.143198	0.830457	-0.268022	Ovis aries	9940	Welch one-way test	N	N	N	N	N	N	N
Uncharacterized protein	W5QB25	NA	432111	1.10079	Down	0.389117	0.591159	1.06687	Down	0.381034	0.773822	1.1744	Down	0.159304	0.482185	506398	460032	431198	0.90844	-0.138536	0.93732	-0.093386	0.851499	-0.231922	Ovis aries	9940	Welch one-way test	N	N	N	N	N	N	N
Uncharacterized protein	W5QB30	NA	524583	1.15128	Down	0.128353	0.306341	1.05831	Down	0.560935	0.85424	1.21841	Down	0.04455	0.296976	527022	457769	432548	0.868595	-0.203244	0.944905	-0.0817582	0.82074	-0.285002	Ovis aries	9940	Welch one-way test	N	N	N	N	N	N	N
NADH:ubiquinone oxidoreductase core subunit S1	W5QB34	NDUFS1	1.79337e+06	1.05463	Up	0.443842	0.63868	1.00627	Down	0.911205	0.967839	1.04806	Up	0.438084	0.71265	1.84474e+06	1945512	1.93339e+06	1.05463	0.0767356	0.993772	-0.00901369	1.04806	0.0677219	Ovis aries	9940	Welch one-way test	N	N	Y	Y	N	Y	Y
Catalase	W5QB36	CAT	1.73069e+07	1.28944	Down	0.032493	0.134556	1.12879	Up	0.121289	0.588733	1.14232	Down	0.196165	0.535236	1.57383e+07	1.22055e+07	1.37775e+07	0.775527	-0.36675	1.12879	0.174779	0.875409	-0.191971	Ovis aries	9940	Welch one-way test	N	N	Y	Y	Y	Y	Y
Uncharacterized protein	W5QB48	NA	4.05705e+06	1.03539	Down	0.587164	0.739808	1.01068	Up	0.85031	0.958267	1.02445	Down	0.684387	0.864225	4.30999e+06	4.16267e+06	4.20713e+06	0.96582	-0.0501741	1.01068	0.0153252	0.976134	-0.0348489	Ovis aries	9940	Welch one-way test	N	N	N	N	N	N	N
Aminoadipate-semialdehyde synthase	W5QB58	AASS	236024	1.15657	Up	0.103018	0.263379	1.02717	Down	0.736613	0.906424	1.12597	Up	0.145429	0.455908	239464	276956	269630	1.15657	0.209851	0.973547	-0.0386773	1.12597	0.171174	Ovis aries	9940	Welch one-way test	N	N	N	N	N	N	N
Uncharacterized protein	W5QB95	LOC114113944	388602	1.27595	Up	0.009089	0.0776889	1.04299	Down	0.530818	0.849376	1.22336	Up	0.028665	0.251907	400018	510404	489366	1.27595	0.351572	0.958783	-0.0607243	1.22336	0.290848	Ovis aries	9940	Welch one-way test	N	N	N	N	N	N	N
14-3-3 protein zeta/delta	W5QBD7	YWHAZ	1.07271e+06	1.13262	Up	0.059938	0.188649	1.11007	Down	0.182923	0.659859	1.02031	Up	0.823361	0.920021	1082046	1.22555e+06	1.10402e+06	1.13262	0.179663	0.90084	-0.150657	1.02031	0.029006	Ovis aries	9940	Welch one-way test	N	N	Y	N	Y	Y	Y
Ribosomal protein lateral stalk subunit P1	W5QBE7	RPLP1	849021	1.28287	Up	0.072326	0.20702	1.12311	Down	0.252989	0.700719	1.14224	Up	0.177297	0.514643	847001	1.08659e+06	967481	1.28287	0.359374	0.890382	-0.167504	1.14224	0.19187	Ovis aries	9940	Welch one-way test	N	N	N	N	N	N	N
Hydroxyacyl-CoA dehydrogenase trifunctional multienzyme complex subunit beta	W5QBF9	HADHB	3.35037e+06	1.17205	Up	0.081386	0.224807	1.03068	Up	0.718049	0.90044	1.20801	Up	0.080642	0.375888	3.42382e+06	4.01288e+06	4.13599e+06	1.17205	0.229033	1.03068	0.0435955	1.20801	0.272629	Ovis aries	9940	Welch one-way test	N	N	N	N	N	N	N
Annexin	W5QBJ0	ANXA3	50430.9	1.37321	Up	8.8e-05	0.013904	1.09466	Down	0.371813	0.768933	1.25446	Up	0.145207	0.455908	50159	68878.6	62922.6	1.37321	0.457547	0.913529	-0.130478	1.25446	0.32707	Ovis aries	9940	Welch one-way test	N	N	N	N	N	N	N
Dihydrolipoamide acetyltransferase component of pyruvate dehydrogenase complex	W5QBN6	PDHX	25656.1	1.02901	Down	0.736796	0.837509	1.0634	Up	0.441812	0.831027	1.03342	Up	0.578352	0.804809	25284.6	24571.7	26129.6	0.971805	-0.0412613	1.0634	0.0886874	1.03342	0.0474261	Ovis aries	9940	Welch one-way test	N	N	N	N	N	N	N
Myosin heavy chain 9	W5QBQ9	MYH9	1.19038e+06	1.30092	Up	0.025518	0.119995	1.12211	Down	0.201438	0.67146	1.15935	Up	0.089491	0.386348	1142866	1.48677e+06	1.32499e+06	1.30092	0.37953	0.891181	-0.166209	1.15935	0.21332	Ovis aries	9940	Welch one-way test	N	N	Y	Y	Y	Y	Y
Uncharacterized protein	W5QBS0	NA	385509	1.11721	Down	0.059522	0.188649	1.05602	Down	0.241857	0.700719	1.17979	Down	0.014281	0.194517	382803	342643	324468	0.895089	-0.159896	0.946956	-0.0786314	0.84761	-0.238528	Ovis aries	9940	Welch one-way test	N	N	N	N	N	N	N
Uncharacterized protein	W5QBT6	NA	102482	1.11897	Up	0.282779	0.49228	1.07683	Down	0.567644	0.855799	1.03914	Up	0.824728	0.920247	112195	125543	116586	1.11897	0.162175	0.928651	-0.106792	1.03914	0.0553836	Ovis aries	9940	Welch one-way test	N	N	N	N	N	N	N
Alpha-galactosidase	W5QBZ7	NAGA	366929	1.11496	Down	0.213402	0.42989	1.15139	Up	0.159577	0.621014	1.03267	Up	0.766247	0.903242	379182	340086	391571	0.896893	-0.156993	1.15139	0.203375	1.03267	0.0463823	Ovis aries	9940	Welch one-way test	N	N	Y	Y	Y	Y	Y
NADH:ubiquinone oxidoreductase subunit A6	W5QC06	NDUFA6	581194	1.01802	Down	0.859959	0.905823	1.05659	Down	0.635644	0.870881	1.07563	Down	0.585312	0.806975	575785	565591	535298	0.982296	-0.0257705	0.946441	-0.0794156	0.929685	-0.105186	Ovis aries	9940	Welch one-way test	N	N	N	N	N	N	N
Tubulin alpha chain	W5QC30	TUBA1C	803179	1.13577	Up	0.151888	0.337055	1.00147	Down	0.985543	0.990754	1.1341	Up	0.284249	0.606157	833282	946420	945027	1.13577	0.183675	0.998528	-0.00212455	1.1341	0.18155	Ovis aries	9940	Welch one-way test	N	N	N	N	N	N	N
Protein disulfide-isomerase	W5QC35	PDIA4	260536	1.38453	Up	0.006852	0.0751817	1.01361	Down	0.838432	0.952939	1.36595	Up	0.003765	0.110161	258198	357482	352684	1.38453	0.469396	0.986577	-0.0194961	1.36595	0.4499	Ovis aries	9940	Welch one-way test	N	N	N	N	N	N	N
Pyruvate kinase	W5QC41	PKM	1.49211e+06	1.06814	Up	0.316097	0.520873	1.00021	Up	0.997503	0.998767	1.06837	Up	0.435803	0.712454	1.50591e+06	1.60853e+06	1.60888e+06	1.06814	0.0951071	1.00021	0.000309398	1.06837	0.0954165	Ovis aries	9940	Welch one-way test	N	N	Y	Y	Y	Y	Y
Armadillo repeat containing 10	W5QC63	ARMC10	42365.7	1.00423	Up	0.9425	0.957037	1.00435	Down	0.914379	0.968128	1.00012	Down	0.998674	0.998674	44291.2	44478.6	44286.1	1.00423	0.00609129	0.995672	-0.00625743	0.999885	-0.000166132	Ovis aries	9940	Welch one-way test	N	N	N	N	N	N	N
Sorting nexin 2	W5QCB0	SNX2	445494	1.07176	Up	0.097324	0.253749	1.08215	Up	0.131559	0.590469	1.1598	Up	0.03142	0.253241	442888	474668	513663	1.07176	0.0999771	1.08215	0.113903	1.1598	0.21388	Ovis aries	9940	Welch one-way test	N	N	N	N	N	N	N
Peptidase, mitochondrial processing beta subunit	W5QCC2	PMPCB	319929	1.01272	Down	0.904597	0.937006	1.00307	Up	0.959005	0.980855	1.00962	Down	0.929316	0.97246	342824	338520	339558	0.987444	-0.0182291	1.00307	0.00441525	0.990471	-0.0138139	Ovis aries	9940	Welch one-way test	N	N	N	N	N	N	N
Isocitrate dehydrogenase [NADP]	W5QCD6	IDH1	3.61905e+06	1.18004	Up	0.452223	0.646033	1.05256	Down	0.768778	0.927228	1.12112	Up	0.494221	0.7596	3.68109e+06	4.34384e+06	4.12695e+06	1.18004	0.238838	0.950068	-0.0738968	1.12112	0.164942	Ovis aries	9940	Welch one-way test	N	N	Y	Y	Y	Y	Y
NADH-cytochrome b5 reductase	W5QCI3	CYB5R3	1.44648e+06	1.43292	Down	0.045012	0.166166	1.10229	Up	0.36844	0.765967	1.29995	Down	0.150613	0.46715	1.36123e+06	949969	1.04714e+06	0.697875	-0.51896	1.10229	0.140506	0.769262	-0.378453	Ovis aries	9940	Welch one-way test	N	N	N	N	N	N	N
Collagen type VI alpha 3 chain	W5QCP9	COL6A3	686042	1.43848	Up	0.024284	0.115568	1.04593	Up	0.792438	0.943582	1.50455	Up	0.08975	0.386348	695451	1.00039e+06	1.04634e+06	1.43848	0.524541	1.04593	0.0647882	1.50455	0.589329	Ovis aries	9940	Welch one-way test	N	N	Y	Y	Y	Y	Y
Dehydrogenase/reductase 1	W5QCV4	DHRS1	147651	1.32579	Down	0.000835	0.0272696	1.02138	Down	0.742904	0.908579	1.35414	Down	0.001482	0.0836271	149947	113100	110732	0.754267	-0.406854	0.979065	-0.0305229	0.738476	-0.437377	Ovis aries	9940	Welch one-way test	N	N	N	N	N	N	N
Sulfurtransferase	W5QCW9	TST	3.68293e+06	1.49893	Down	0.000586	0.0243653	1.1412	Up	0.190964	0.669196	1.31347	Down	0.013026	0.187101	3.89431e+06	2.59806e+06	2.96491e+06	0.667144	-0.583929	1.1412	0.190549	0.761344	-0.39338	Ovis aries	9940	Welch one-way test	N	N	N	N	N	N	N
Tubulin tyrosine ligase like 12	W5QCX9	TTLL12	259621	1.09775	Up	0.230624	0.447649	1.03304	Down	0.569127	0.855816	1.06264	Up	0.241012	0.567146	263993	289797	280528	1.09775	0.134547	0.968016	-0.0468968	1.06264	0.0876499	Ovis aries	9940	Welch one-way test	N	N	N	N	N	N	N
GLOBIN domain-containing protein	W5QCY8	NA	8.35733e+06	1.18818	Up	0.530423	0.699675	2.03561	Down	0.032715	0.389784	1.71322	Down	0.032668	0.253241	9.7542e+06	1.15897e+07	5.69349e+06	1.18818	0.248752	0.491252	-1.02546	0.583696	-0.776711	Ovis aries	9940	Welch one-way test	N	N	N	N	N	N	N
Sulfurtransferase	W5QCZ0	MPST	420195	1.09844	Up	0.173999	0.373702	1.04008	Up	0.51665	0.846103	1.14247	Up	0.095857	0.388344	413014	453672	471855	1.09844	0.135461	1.04008	0.0566936	1.14247	0.192155	Ovis aries	9940	Welch one-way test	N	N	N	N	Y	Y	Y
Acyl-CoA dehydrogenase long chain	W5QD03	ACADL	1.02401e+06	1.09348	Down	0.234968	0.450545	1.11953	Up	0.154298	0.611998	1.02382	Up	0.74698	0.894112	1.01357e+06	926924	1.03772e+06	0.91451	-0.128929	1.11953	0.162892	1.02382	0.033963	Ovis aries	9940	Welch one-way test	N	N	N	N	N	N	N
Proteasome subunit alpha type	W5QD30	PSMA5	146923	1.10726	Up	0.033146	0.135673	1.03834	Down	0.48842	0.846103	1.06638	Up	0.339946	0.645571	148386	164303	158236	1.10726	0.146998	0.963074	-0.054282	1.06638	0.0927164	Ovis aries	9940	Welch one-way test	N	N	N	N	N	N	N
Proteasome activator subunit 2	W5QD41	PSME2	48486.4	1.1884	Up	0.061008	0.189005	1.07828	Down	0.459966	0.843412	1.10212	Up	0.508479	0.765928	48543.7	57689.1	53501.2	1.1884	0.249015	0.927406	-0.108728	1.10212	0.140287	Ovis aries	9940	Welch one-way test	N	N	Y	N	N	Y	Y
Proteasome activator subunit 1	W5QD49	PSME1	579579	1.18714	Up	0.047958	0.172604	1.08296	Down	0.287926	0.718209	1.0962	Up	0.30668	0.624206	618208	733897	677680	1.18714	0.247485	0.923398	-0.114975	1.0962	0.13251	Ovis aries	9940	Welch one-way test	N	N	N	N	N	N	N
Phosphoenolpyruvate carboxykinase 2, mitochondrial	W5QD66	PCK2	6.52221e+06	1.15625	Down	0.16349	0.356788	1.04241	Down	0.691729	0.899183	1.20529	Down	0.015761	0.20752	6454617	5.58239e+06	5355252	0.864868	-0.209448	0.959311	-0.059929	0.829678	-0.269377	Ovis aries	9940	Welch one-way test	N	N	N	N	N	N	N
Uncharacterized protein	W5QD93	LOC101119050	9.35653e+06	1.12672	Down	0.191841	0.400938	1.02114	Down	0.811942	0.946015	1.15054	Down	0.085347	0.383351	9.44142e+06	8.37953e+06	8.20608e+06	0.887529	-0.172134	0.9793	-0.0301769	0.869157	-0.202311	Ovis aries	9940	Welch one-way test	N	N	N	N	N	N	N
Uncharacterized protein	W5QDD0	LOC101108092	1.14615e+06	1.03853	Down	0.730078	0.836237	1.11123	Down	0.2895	0.718209	1.15405	Down	0.289432	0.608115	1.10877e+06	1.06764e+06	960766	0.962901	-0.05454	0.899901	-0.152163	0.866515	-0.206703	Ovis aries	9940	Welch one-way test	N	N	N	N	N	N	N
5-aminoimidazole-4-carboxamide ribonucleotide formyltransferase/IMP cyclohydrolase	W5QDE5	ATIC	227319	1.09254	Down	0.199955	0.407738	1.00199	Up	0.975072	0.987343	1.09037	Down	0.250201	0.567146	231848	212210	212632	0.915299	-0.127686	1.00199	0.00287016	0.917121	-0.124815	Ovis aries	9940	Welch one-way test	N	N	N	N	N	N	N
Glutathione S-transferase	W5QDF4	GSTM3	373632	1.22051	Down	0.380185	0.578702	1.1542	Up	0.353175	0.75712	1.05746	Down	0.796777	0.912731	323992	265456	306388	0.819327	-0.287488	1.1542	0.206887	0.945664	-0.0806007	Ovis aries	9940	Welch one-way test	N	N	Y	Y	Y	Y	Y
Fibronectin 1	W5QDG8	FN1	29156.6	1.70274	Up	0.00511	0.0602522	1.13082	Down	0.347462	0.752984	1.50576	Up	0.012445	0.186601	30798.3	52441.5	46374.9	1.70274	0.767858	0.884317	-0.177365	1.50576	0.590493	Ovis aries	9940	Welch one-way test	N	Y	N	N	N	N	Y
Peroxisomal trans-2-enoyl-CoA reductase	W5QDI9	PECR	1.5274e+06	1.06253	Down	0.458118	0.64743	1.19712	Up	0.010179	0.2594	1.12667	Up	0.261437	0.582953	1638183	1.54178e+06	1.8457e+06	0.941152	-0.0875002	1.19712	0.259569	1.12667	0.172069	Ovis aries	9940	Welch one-way test	N	N	N	N	N	N	N
Splicing factor proline and glutamine rich	W5QDT2	SFPQ	384542	1.144	Up	0.030615	0.130031	1.1017	Down	0.161485	0.622308	1.03839	Up	0.645733	0.845857	382645	437745	397337	1.144	0.194082	0.90769	-0.139728	1.03839	0.0543536	Ovis aries	9940	Welch one-way test	N	N	Y	N	N	Y	Y
Uncharacterized protein	W5QDT8	NA	242377	1.1592	Up	0.008515	0.0764594	1.15166	Down	0.00929	0.259038	1.00655	Up	0.908408	0.958134	249504	289225	251138	1.1592	0.213131	0.868311	-0.203716	1.00655	0.00941509	Ovis aries	9940	Welch one-way test	N	N	N	N	N	N	N
Tetratricopeptide repeat domain 38	W5QDU4	TTC38	1.8409e+06	1.0492	Up	0.715295	0.834115	1.06064	Up	0.573796	0.858521	1.11283	Up	0.425934	0.706971	1.64536e+06	1.72632e+06	1.83101e+06	1.0492	0.0692964	1.06064	0.0849377	1.11283	0.154234	Ovis aries	9940	Welch one-way test	N	N	N	N	N	N	N
ATPase H+ transporting V1 subunit A	W5QDY5	ATP6V1A	262921	1.13945	Up	0.040929	0.156961	1.0332	Up	0.563948	0.85424	1.17728	Up	0.04015	0.285752	268312	305726	315878	1.13945	0.188333	1.0332	0.047124	1.17728	0.235457	Ovis aries	9940	Welch one-way test	N	N	N	N	Y	Y	Y
Arp2/3 complex 34 kDa subunit	W5QDZ3	NA	101718	1.08866	Up	0.260558	0.474288	1.06872	Down	0.252849	0.700719	1.01866	Up	0.751117	0.897704	96273.7	104809	98069.9	1.08866	0.122549	0.935701	-0.0958803	1.01866	0.0266687	Ovis aries	9940	Welch one-way test	N	N	N	N	N	N	N
Uncharacterized protein	W5QE14	PCBP1	1.70792e+06	1.08997	Up	0.077202	0.215511	1.07987	Down	0.073781	0.525428	1.00935	Up	0.778238	0.905461	1.68638e+06	1.8381e+06	1.70215e+06	1.08997	0.124284	0.926039	-0.110854	1.00935	0.0134299	Ovis aries	9940	Welch one-way test	N	N	N	N	N	N	N
Proteasome subunit beta	W5QE19	PSMB2	378584	1.05267	Up	0.525854	0.699675	1.14389	Down	0.02312	0.358133	1.08666	Down	0.339045	0.645571	389276	409778	358233	1.05267	0.0740485	0.874213	-0.193942	0.920255	-0.119894	Ovis aries	9940	Welch one-way test	N	N	N	N	Y	Y	Y
Villin 1	W5QE76	VIL1	3.048e+06	1.10467	Down	0.240281	0.455994	1.0107	Down	0.899284	0.967839	1.11649	Down	0.196122	0.535236	3.17176e+06	2871223	2.84083e+06	0.905245	-0.14362	0.989414	-0.0153543	0.895662	-0.158974	Ovis aries	9940	Welch one-way test	N	N	N	N	N	N	N
Uncharacterized protein	W5QEA9	ATP5PB	1.49963e+06	1.12311	Down	0.111223	0.280947	1.0149	Up	0.829163	0.946588	1.10661	Down	0.248543	0.567146	1.5085e+06	1.34315e+06	1.36317e+06	0.890388	-0.167494	1.0149	0.0213425	0.903658	-0.146152	Ovis aries	9940	Welch one-way test	N	N	N	N	N	N	N
RRM domain-containing protein	W5QEI1	NA	348167	1.21651	Up	0.036136	0.142737	1.10409	Down	0.276659	0.711462	1.10182	Up	0.361879	0.666743	348728	424231	384237	1.21651	0.282749	0.905725	-0.142855	1.10182	0.139894	Ovis aries	9940	Welch one-way test	N	N	N	N	N	N	N
KOW domain-containing protein	W5QEJ5	RPL26	356106	1.2065	Up	0.021827	0.113443	1.04711	Down	0.610171	0.867498	1.15222	Up	0.274363	0.598245	358765	432851	413376	1.2065	0.270832	0.955007	-0.0664169	1.15222	0.204415	Ovis aries	9940	Welch one-way test	N	N	N	N	N	N	N
MFS domain-containing protein	W5QET6	SLC16A1	138768	1.02186	Up	0.773157	0.859063	1.15052	Down	0.03701	0.41198	1.12591	Down	0.087113	0.386348	145872	149061	129560	1.02186	0.031193	0.869174	-0.202283	0.888171	-0.17109	Ovis aries	9940	Welch one-way test	N	N	N	N	N	N	N
Annexin	W5QEU6	ANXA4	988833	1.17422	Up	0.175647	0.37503	1.16932	Down	0.076005	0.531362	1.00419	Up	0.971235	0.988563	1.03202e+06	1.21182e+06	1.03635e+06	1.17422	0.231699	0.855198	-0.22567	1.00419	0.00602978	Ovis aries	9940	Welch one-way test	N	N	Y	N	Y	Y	Y
NADH:ubiquinone oxidoreductase subunit B4	W5QF73	NDUFB4	1.07433e+06	1.06866	Down	0.246812	0.462281	1.05992	Up	0.105481	0.568621	1.00824	Down	0.895319	0.953454	1.14185e+06	1.06848e+06	1.13251e+06	0.93575	-0.0958045	1.05992	0.0839618	0.991825	-0.0118428	Ovis aries	9940	Welch one-way test	N	N	N	N	N	N	N
Homogentisate 1,2-dioxygenase	W5QF94	HGD	438476	1.11607	Down	0.298752	0.507557	1.10495	Down	0.258054	0.700719	1.23321	Down	0.063479	0.345733	466040	417572	377909	0.896001	-0.158427	0.905015	-0.143986	0.810895	-0.302413	Ovis aries	9940	Welch one-way test	N	N	N	N	Y	Y	Y
NADH:ubiquinone oxidoreductase subunit S5	W5QFF9	NDUFS5	264176	1.01523	Up	0.824271	0.885951	1.07617	Up	0.348666	0.752984	1.09256	Up	0.378712	0.675355	281492	285778	307546	1.01523	0.0218004	1.07617	0.105906	1.09256	0.127706	Ovis aries	9940	Welch one-way test	N	N	N	N	N	N	N
Actin-related protein 2	W5QFG8	ACTR2	970775	1.21872	Up	0.005198	0.0603885	1.07061	Down	0.15093	0.61146	1.13834	Up	0.017652	0.22135	998692	1.21712e+06	1.13685e+06	1.21872	0.285365	0.934048	-0.0984313	1.13834	0.186934	Ovis aries	9940	Welch one-way test	N	N	N	N	Y	Y	Y
Uncharacterized protein	W5QFG9	NA	305679	1.17459	Up	0.0152	0.0938125	1.06919	Down	0.261174	0.700719	1.09859	Up	0.195079	0.535236	317364	372773	348651	1.17459	0.23216	0.935291	-0.0965129	1.09859	0.135647	Ovis aries	9940	Welch one-way test	N	N	N	N	N	N	N
Histone H4	W5QFN3	NA	3.87889e+07	1.14134	Up	0.055514	0.184628	1.03576	Down	0.523209	0.846103	1.10194	Up	0.210085	0.5423	3.97159e+07	45329339	4.37643e+07	1.14134	0.190729	0.965475	-0.0506897	1.10194	0.14004	Ovis aries	9940	Welch one-way test	N	N	N	N	N	N	N
UTP--glucose-1-phosphate uridylyltransferase	W5QFN9	UGP2	79736.5	1.13106	Up	0.059811	0.188649	1.03082	Down	0.562565	0.85424	1.09724	Up	0.128047	0.432295	82933.8	93803.1	90998.6	1.13106	0.177675	0.970102	-0.0437913	1.09724	0.133884	Ovis aries	9940	Welch one-way test	N	N	N	N	N	N	N
Histone cluster 1 H1 family member d	W5QFP2	HIST1H1D	1.03032e+06	1.02677	Down	0.709942	0.830895	1.00138	Up	0.983547	0.990754	1.02535	Down	0.766481	0.903242	1.07558e+06	1.04754e+06	1.04898e+06	0.973928	-0.0381124	1.00138	0.00199367	0.975275	-0.0361187	Ovis aries	9940	Welch one-way test	N	N	N	N	N	N	N
Malate dehydrogenase	W5QFQ1	MDH1	1.36643e+07	1.14285	Down	0.013717	0.0907754	1.06601	Up	0.110632	0.570421	1.07209	Down	0.07172	0.354117	1.33418e+07	1.16741e+07	1.24447e+07	0.875006	-0.192636	1.06601	0.0922161	0.932762	-0.10042	Ovis aries	9940	Welch one-way test	N	N	N	N	Y	Y	Y
T-complex protein 1 subunit delta	W5QFZ3	NA	620364	1.28381	Up	0.000264	0.0155179	1.14007	Down	0.003496	0.184123	1.12608	Up	0.000129	0.020382	611591	785169	688700	1.28381	0.360436	0.877136	-0.189128	1.12608	0.171308	Ovis aries	9940	Welch one-way test	N	N	N	N	N	N	N
Aspartyl aminopeptidase	W5QG01	DNPEP	302983	1.14808	Up	0.099593	0.257962	1.08118	Down	0.263105	0.700719	1.06188	Up	0.50394	0.764324	300320	344792	318902	1.14808	0.199226	0.924912	-0.112611	1.06188	0.0866149	Ovis aries	9940	Welch one-way test	N	N	N	N	N	N	N
Adenylyl cyclase-associated protein	W5QG16	CAP1	439774	1.03915	Up	0.47114	0.654288	1.08124	Down	0.127843	0.590469	1.0405	Down	0.519699	0.770286	432286	449211	415461	1.03915	0.0554075	0.924867	-0.112682	0.961078	-0.0572748	Ovis aries	9940	Welch one-way test	N	N	Y	Y	Y	Y	Y
Desmin	W5QG29	DES	384874	1.36141	Up	0.008207	0.0764594	1.09368	Down	0.481283	0.846103	1.2448	Up	0.230254	0.554575	420659	572689	523634	1.36141	0.4451	0.914344	-0.129192	1.2448	0.315908	Ovis aries	9940	Welch one-way test	N	N	Y	Y	N	Y	Y
Sodium/potassium-transporting ATPase subunit alpha	W5QG59	ATP1A1	6.38376e+06	1.18154	Down	0.011089	0.0834315	1.12884	Up	0.045857	0.440528	1.04669	Down	0.347477	0.653588	6.5348e+06	5.53073e+06	6243316	0.84635	-0.240674	1.12884	0.174844	0.955395	-0.0658301	Ovis aries	9940	Welch one-way test	N	N	Y	N	Y	Y	Y
Isovaleryl-CoA dehydrogenase	W5QG64	IVD	1.99966e+06	1.11869	Down	0.215489	0.42989	1.06072	Up	0.489144	0.846103	1.05465	Down	0.682814	0.864225	1.90833e+06	1705860	1.80945e+06	0.893903	-0.16181	1.06072	0.0850489	0.948184	-0.0767608	Ovis aries	9940	Welch one-way test	N	N	N	N	N	N	N
40S ribosomal protein S3a	W5QG75	RPS3A	161987	1.14127	Up	0.143621	0.324173	1.05063	Down	0.523411	0.846103	1.08626	Up	0.377517	0.674824	163133	186178	177206	1.14127	0.190634	0.951808	-0.0712582	1.08626	0.119376	Ovis aries	9940	Welch one-way test	N	N	N	N	N	N	N
L-lactate dehydrogenase	W5QGD1	NA	1.09291e+07	1.0465	Down	0.557703	0.71789	1.03517	Up	0.597448	0.867498	1.01094	Down	0.859421	0.937766	1.17562e+07	1.12338e+07	1.16289e+07	0.955563	-0.0655777	1.03517	0.0498743	0.989174	-0.0157033	Ovis aries	9940	Welch one-way test	N	N	N	N	N	N	N
Uncharacterized protein	W5QGG7	CCT2	514054	1.13755	Up	0.068335	0.200631	1.12527	Down	0.032596	0.389784	1.01092	Up	0.796896	0.912731	494752	562806	500154	1.13755	0.185931	0.888679	-0.170265	1.01092	0.0156654	Ovis aries	9940	Welch one-way test	N	N	N	N	N	N	N
H1 histone family member 0	W5QGM7	H1F0	862795	1.20453	Down	0.08016	0.22298	1.06965	Down	0.514515	0.846103	1.28842	Down	0.001654	0.087058	863380	716779	670109	0.830202	-0.268466	0.934889	-0.0971323	0.776147	-0.365599	Ovis aries	9940	Welch one-way test	N	N	N	N	N	N	N
3-hydroxybutyrate dehydrogenase 1	W5QGP1	BDH1	728092	1.39779	Down	0.002627	0.0453907	1.05006	Up	0.581521	0.861917	1.33115	Down	0.015118	0.202427	727972	520801	546873	0.715413	-0.483151	1.05006	0.0704725	0.751227	-0.412678	Ovis aries	9940	Welch one-way test	N	N	N	N	N	N	N
Lysozyme	W5QGQ3	LOC101102714	108042	1.03429	Down	0.771693	0.858644	1.39866	Up	0.057195	0.490123	1.35229	Up	0.156902	0.479779	116206	112354	157145	0.966849	-0.048638	1.39866	0.484045	1.35229	0.435407	Ovis aries	9940	Welch one-way test	N	N	N	N	N	N	N
Succinate--CoA ligase [ADP/GDP-forming] subunit alpha, mitochondrial	W5QGQ8	SUCLG1	3.27873e+06	1.019	Up	0.769947	0.858644	1.02441	Up	0.670639	0.890049	1.04387	Up	0.478456	0.744056	3.4858e+06	3.55202e+06	3.63873e+06	1.019	0.0271527	1.02441	0.0347938	1.04387	0.0619465	Ovis aries	9940	Welch one-way test	Y	N	N	N	N	N	N
Hydroxyacid oxidase 2	W5QGQ9	HAO2	1.06652e+06	1.62438	Up	0.150884	0.33577	1.3075	Down	0.185587	0.665552	1.24235	Up	0.595741	0.814248	1.11565e+06	1812242	1.38603e+06	1.62438	0.699886	0.764817	-0.386813	1.24235	0.313073	Ovis aries	9940	Welch one-way test	Y	N	N	N	N	N	N
D-3-phosphoglycerate dehydrogenase	W5QGS4	PHGDH	1.48284e+06	1.65419	Down	0.017809	0.102694	1.59505	Up	0.00084	0.1185	1.03708	Down	0.776996	0.905461	1.49651e+06	904679	1.44301e+06	0.604526	-0.726124	1.59505	0.673602	0.96425	-0.0525215	Ovis aries	9940	Welch one-way test	N	N	N	N	N	N	N
EH domain containing 4	W5QGX7	EHD4	355528	1.03971	Down	0.559808	0.718284	1.08019	Up	0.160451	0.621354	1.03894	Up	0.569588	0.804809	380147	365628	394949	0.961805	-0.0561832	1.08019	0.111291	1.03894	0.0551082	Ovis aries	9940	Welch one-way test	N	N	Y	Y	N	Y	Y
LIM domain containing preferred translocation partner in lipoma	W5QH03	LPP	418181	1.01346	Down	0.822738	0.885508	1.01922	Up	0.723768	0.90044	1.00569	Up	0.896605	0.953454	418653	413093	421034	0.986719	-0.0192883	1.01922	0.0274691	1.00569	0.00818074	Ovis aries	9940	Welch one-way test	N	N	N	N	N	N	N
Alpha-2-HS-glycoprotein	W5QH56	AHSG	909014	1.96311	Up	0.064771	0.195302	1.6625	Down	0.066892	0.50642	1.18082	Up	0.146136	0.456314	922750	1.81146e+06	1.0896e+06	1.96311	0.973144	0.601502	-0.733358	1.18082	0.239787	Ovis aries	9940	Welch one-way test	N	Y	Y	Y	Y	Y	Y
PDZ domain containing 1	W5QHA3	PDZK1	3.79451e+06	1.26734	Down	0.004035	0.0522566	1.14235	Up	0.041744	0.422792	1.10942	Down	0.199189	0.535236	3.63522e+06	2.86838e+06	3.2767e+06	0.789054	-0.341804	1.14235	0.192004	0.901376	-0.1498	Ovis aries	9940	Welch one-way test	Y	N	N	N	N	N	N
Enoyl-CoA hydratase and 3-hydroxyacyl CoA dehydrogenase	W5QHA4	EHHADH	1.55499e+07	1.05711	Down	0.567613	0.723459	1.1569	Up	0.11942	0.585974	1.0944	Up	0.234852	0.562221	1.53888e+07	14557395	1.68415e+07	0.945974	-0.0801271	1.1569	0.21027	1.0944	0.130143	Ovis aries	9940	Welch one-way test	Y	N	N	N	N	N	N
Uncharacterized protein	W5QHD5	DERA	92729.4	1.07848	Up	0.359186	0.559678	1.01295	Up	0.85282	0.958361	1.09245	Up	0.426503	0.706971	89259.7	96265	97511.7	1.07848	0.109002	1.01295	0.018564	1.09245	0.127566	Ovis aries	9940	Welch one-way test	N	N	N	N	N	N	N
Distal membrane arm assembly complex 2 like	W5QHH7	DMAC2L	233021	1.16158	Up	0.244351	0.459613	1.17524	Down	0.200744	0.67146	1.01176	Down	0.912194	0.960844	238461	276991	235689	1.16158	0.216085	0.85089	-0.232956	0.988374	-0.0168708	Ovis aries	9940	Welch one-way test	N	N	N	N	N	N	N
MICOS complex subunit MIC60	W5QHI0	IMMT	851577	1.00746	Down	0.854817	0.901609	1.00321	Up	0.954344	0.980007	1.00423	Down	0.949562	0.980593	850350	844057	846768	0.9926	-0.0107158	1.00321	0.00462581	0.995788	-0.00609002	Ovis aries	9940	Welch one-way test	N	N	N	N	N	N	N
NADH:ubiquinone oxidoreductase subunit B5	W5QHN8	NDUFB5	99438.1	1.09426	Down	0.270601	0.484626	1.05214	Up	0.514367	0.846103	1.04003	Down	0.613304	0.831064	104871	95837.6	100835	0.913858	-0.129958	1.05214	0.0733285	0.961508	-0.0566291	Ovis aries	9940	Welch one-way test	N	N	N	N	N	N	N
Uncharacterized protein	W5QHQ7	NCL	483223	1.17974	Up	0.126169	0.304812	1.08418	Down	0.335572	0.740399	1.08814	Up	0.207342	0.5423	503170	593609	547519	1.17974	0.238467	0.922356	-0.116605	1.08814	0.121862	Ovis aries	9940	Welch one-way test	N	N	Y	Y	N	Y	Y
Nidogen 2	W5QHQ8	NID2	512220	1.15428	Up	0.086304	0.234619	1.08544	Up	0.327645	0.740399	1.2529	Up	0.043681	0.296976	519632	599801	651048	1.15428	0.206992	1.08544	0.118282	1.2529	0.325274	Ovis aries	9940	Welch one-way test	N	N	N	N	N	N	N
Peptidyl-prolyl cis-trans isomerase	W5QHU9	PPIB	1.07582e+06	1.02262	Up	0.64488	0.781373	1.01372	Up	0.785917	0.942146	1.03665	Up	0.54052	0.783327	1031194	1.05452e+06	1068983	1.02262	0.032267	1.01372	0.0196561	1.03665	0.0519231	Ovis aries	9940	Welch one-way test	N	Y	N	N	Y	Y	Y
Sorting nexin 1	W5QHV6	SNX1	915326	1.17294	Down	5.6e-05	0.013825	1.13298	Up	0.015286	0.326462	1.03527	Down	0.531398	0.778858	931133	793848	899415	0.852561	-0.230124	1.13298	0.180124	0.965936	-0.0500008	Ovis aries	9940	Welch one-way test	N	N	N	N	N	N	N
Lactamase beta	W5QI00	LACTB	261285	1.1039	Up	0.041508	0.158412	1.00432	Up	0.925838	0.970159	1.10867	Up	0.121335	0.421136	266836	294561	295834	1.1039	0.142612	1.00432	0.00622095	1.10867	0.148833	Ovis aries	9940	Welch one-way test	N	N	N	N	N	N	N
Adenylate kinase 2, mitochondrial	W5QI77	AK2	2.20465e+06	1.02993	Down	0.743766	0.840866	1.05673	Up	0.505357	0.846103	1.02603	Up	0.770614	0.903242	2.0673e+06	2.00723e+06	2.1211e+06	0.970943	-0.0425419	1.05673	0.0796082	1.02603	0.0370663	Ovis aries	9940	Welch one-way test	N	N	N	N	N	N	N
Tropomodulin 3	W5QIH2	TMOD3	211816	1.0498	Down	0.195035	0.401865	1.02603	Down	0.522863	0.846103	1.07713	Down	0.074518	0.36339	212826	202731	197587	0.952565	-0.0701105	0.974627	-0.037078	0.928396	-0.107188	Ovis aries	9940	Welch one-way test	N	N	N	N	N	N	N
Selenium binding protein 1	W5QIK8	SELENBP1	6.96623e+06	1.08572	Down	0.719601	0.834115	1.16247	Down	0.490825	0.846103	1.26213	Down	0.212115	0.5423	6.54428e+06	6.02757e+06	5.18513e+06	0.921044	-0.118658	0.860235	-0.217197	0.792315	-0.335855	Ovis aries	9940	Welch one-way test	N	N	Y	Y	Y	Y	Y
Solute carrier family 27 member 2	W5QIK9	SLC27A2	1.01049e+06	1.37105	Down	0.000477	0.0221665	1.26869	Up	0.00669	0.242049	1.08068	Down	0.225249	0.552762	1.04009e+06	758611	962438	0.729371	-0.455276	1.26869	0.343334	0.925342	-0.111942	Ovis aries	9940	Welch one-way test	N	N	N	N	N	N	N
Pyr_redox_2 domain-containing protein	W5QIQ6	SQOR	120478	1.27945	Up	0.06709	0.200022	1.13732	Up	0.004863	0.225986	1.45514	Up	0.010545	0.169739	139815	178886	203451	1.27945	0.35552	1.13732	0.185638	1.45514	0.541157	Ovis aries	9940	Welch one-way test	N	N	N	N	N	N	N
Glycine amidinotransferase	W5QIR6	GATM	1.24267e+06	1.19541	Down	0.344962	0.546132	1.01342	Up	0.956437	0.980007	1.17959	Down	0.579911	0.804809	1.50492e+06	1.25891e+06	1.2758e+06	0.836533	-0.257506	1.01342	0.0192257	0.847755	-0.23828	Ovis aries	9940	Welch one-way test	Y	N	N	N	Y	Y	Y
Sorbitol dehydrogenase	W5QIT0	SORD	5.63789e+06	1.09965	Down	0.127136	0.306046	1.02913	Up	0.67676	0.894047	1.06852	Down	0.387757	0.682245	5.74623e+06	5.22553e+06	5.37777e+06	0.909384	-0.137039	1.02913	0.0414304	0.935877	-0.0956086	Ovis aries	9940	Welch one-way test	N	N	N	N	Y	Y	Y
Fermitin family member 2	W5QIT7	FERMT2	73486.9	1.06004	Up	0.445311	0.639629	1.16265	Down	0.103672	0.568621	1.0968	Down	0.466317	0.732796	77926.7	82605.4	71049.1	1.06004	0.0841184	0.860102	-0.21742	0.911743	-0.133301	Ovis aries	9940	Welch one-way test	N	N	Y	Y	N	Y	Y
Thioesterase superfamily member 4	W5QIU3	THEM4	831109	1.00327	Up	0.978199	0.983177	1.11899	Up	0.209186	0.681177	1.12264	Up	0.236271	0.562971	884597	887486	993088	1.00327	0.00470417	1.11899	0.162198	1.12264	0.166902	Ovis aries	9940	Welch one-way test	N	N	N	N	N	N	N
Protein S100	W5QIV1	S100A11	231965	1.6003	Up	0.036406	0.143088	1.19173	Down	0.278421	0.711821	1.34284	Up	0.063214	0.345733	257504	412083	345787	1.6003	0.678341	0.839119	-0.253052	1.34284	0.425289	Ovis aries	9940	Welch one-way test	N	N	N	N	N	N	N
Trans-L-3-hydroxyproline dehydratase	W5QIZ3	L3HYPDH	391508	1.12181	Down	0.315236	0.520873	1.02632	Down	0.860984	0.963424	1.15133	Down	0.399458	0.693696	405629	361583	352312	0.891415	-0.165831	0.974359	-0.037474	0.868558	-0.203305	Ovis aries	9940	Welch one-way test	N	N	N	N	N	N	N
Methylenetetrahydrofolate dehydrogenase, cyclohydrolase and formyltetrahydrofolate synthetase 1	W5QJ31	MTHFD1	1.3654e+06	1.06355	Down	0.380011	0.578702	1.05066	Up	0.511317	0.846103	1.01226	Down	0.857793	0.937766	1.34691e+06	1.26643e+06	1330592	0.940248	-0.0888874	1.05066	0.0713007	0.987884	-0.0175867	Ovis aries	9940	Welch one-way test	N	N	N	N	N	N	N
Cytochrome c domain-containing protein	W5QJA7	NA	184196	2.52051	Down	0.021227	0.111796	1.22752	Up	0.090296	0.559289	2.05334	Down	0.062096	0.345733	309824	122921	150888	0.396745	-1.33371	1.22752	0.295742	0.487011	-1.03797	Ovis aries	9940	Welch one-way test	N	N	N	N	N	N	N
Lysophospholipase I	W8R447	LYPLA1	3.8505e+06	1.04174	Down	0.422488	0.623861	1.0585	Up	0.179872	0.654834	1.01609	Up	0.77031	0.903242	3.71481e+06	3.56598e+06	3.7746e+06	0.959937	-0.058989	1.0585	0.0820235	1.01609	0.0230345	Ovis aries	9940	Welch one-way test	N	N	N	N	Y	Y	Y

## Sheet: Data dictionary
Protein Name	Name of the protein
Uniprot ID	Uniprot ID for the protein
Gene	Gene which encodes the protein. Where an encoding gene is unknown for a protein, NA is listed
Median protein intensity at baseline	The median relative intensity of the protein in the Baseline group
B-HF Absolute Fold Change	The fold-change in relative intensity of the protein between Baseline and Heart Failure
BL-HF FC Direction	The direction of the fold-change in protein intensity between Baseline and Heart Failure
BL-HF P-value	The p-value for the fold-change in protein intensity between Baseline and Heart Failure, obtained using a Welch one-way test
BL-HF BH Adjusted P-value	The adjusted p-value for the fold-change in protein intensity between Baseline and Heart Failure, obtained using a Welch one-way test and adjusted using the Benjamini-Hochberg method
HF-R Absolute Fold Change	The fold-change in relative intensity of the protein between Heart Failure and Recovery
HF-R FC Direction	The direction of the fold-change in protein intensity between Heart Failure and Recovery
HF-R P-value	The p-value for the fold-change in protein intensity between Heart Failure and Recovery, obtained using a Welch one-way test
HF-R BH Adjusted P-value	The adjusted p-value for the fold-change in protein intensity between Heart Failure and Recovery, obtained using a Welch one-way test and adjusted using the Benjamini-Hochberg method
B-R Absolute Fold Change	The fold-change in relative intensity of the protein between Baseline and Recovery
BL-R FC Direction	The direction of the fold-change in protein intensity between Baseline and Recovery
BL-R P-value	The p-value for the fold-change in protein intensity between Baseline and Recovery, obtained using a Welch one-way test
BL-R BH Adjusted P-value	The adjusted p-value for the fold-change in protein intensity between Baseline and Recovery, obtained using a Welch one-way test and adjusted using the Benjamini-Hochberg method
Baseline Group Mean	The mean relative intensity of the protein in the Baseline group
HF Group Mean	The mean relative intensity of the protein in the Heart Failure group
Recovery Group Mean	The mean relative intensity of the protein in the Recovery group
BL-HF FC	The fold-change in relative intensity of the protein between Baseline and Heart Failure, with negative fold-changes expressed as values <1
BL-HF FC Log2	The Log 2 transformed 'fold-change in relative intensity of the protein between Baseline and Heart Failure, with negative fold-changes expressed as values <1'
HF-R FC	The fold-change in relative intensity of the protein between Heart Failure and Recovery, with negative fold-changes expressed as values <1
HF-R FC Log2	The Log 2 transformed 'fold-change in relative intensity of the protein between Heart Failure and Recovery, with negative fold-changes expressed as values <1'
BL-R FC	The fold-change in relative intensity of the protein between Baseline and Recovery, with negative fold-changes expressed as values <1
BL-R FC Log2	The Log 2 transformed 'fold-change in relative intensity of the protein between Baseline and Recovery, with negative fold-changes expressed as values <1'
Species	The species in which the protein orignates
Species Number	The species number for which the protein originates
Statistical Test	Name of the statistical test used to generate p values
Kidney enriched protein (Human Protein Atlas)	Yes/No column of whether a protein is enriched in the kidney as notated by the Human Protein Atlas. Y = Yes, N = No
Secreted protein (Human Protein Atlas Secretome)	Yes/No column of whether a protein is enriched in secreted as notated by the Human Protein Atlas Secretome. Y = Yes, N = No
Blood	Yes/No column of whether a protein is detetctable in the blood as notated by Ingenuity Pathway Analysis Biomarker Filter workflow. Y = Yes, N = No
Plasma/Serum	Yes/No column of whether a protein is detetctable in the plasma or serum as notated by Ingenuity Pathway Analysis Biomarker Filter workflow. Y = Yes, N = No
Urine	Yes/No column of whether a protein is detetctable in the urine as notated by Ingenuity Pathway Analysis Biomarker Filter workflow. Y = Yes, N = No
IPA Biomarker	Summary Yes/No column of whether a protein is detetctable in the blood, urine, plasma or serum as notated by Ingenuity Pathway Analysis Biomarker Filter workflow. Y = Yes, N = No
Potential Biomarker	Summary Yes/No column of whether a protein is secreted (as notated by the Human Protein Atlas Secretome) or detetctable in the blood, urine, plasma or serum (as notated by Ingenuity Pathway Analysis Biomarker Filter workflow). Y = Yes, N = No
